# Supplementary material for: Binuclear methylphosphinidine complexes of cyclopentadienylruthenium carbonyls: effects of the higher ligand field strength of ruthenium derivatives relative to iron derivatives
Source: Royal Society of Chemistry journal article supplement (doi:10.1039/d4dt02279c), 2024-01-01
Supplement: d4dt02279c1.pdf [file d4dt02279c1.pdf]

Supporting Information

# Binuclear Methylphosphinidine Complexes of Cyclopentadienylruthenium Carbonyls: Effects of the Higher Ligand Field Strength of Ruthenium Derivatives Relative to Iron Derivatives

Oleg Rudenco,<sup>1</sup> Alexandru Lupan,<sup>1\*</sup> Radu Silaghi-Dumitrescu, and R. Bruce King<sup>\*2</sup>

<sup>1</sup>*Faculty of Chemistry and Chemical Engineering, Babeş-Bolyai University, Cluj-Napoca,  
Romania*

<sup>2</sup>*Department of Chemistry, University of Georgia, Athens, Georgia, 30602*

Table S1. Initial Cp<sub>2</sub>Ru<sub>2</sub>PMe(CO)<sub>n</sub> structures.

Table S2. Distance table for the lowest-lying Cp<sub>2</sub>Fe<sub>2</sub>PMe structures.

Table S3. Distance table for the lowest-lying Cp<sub>2</sub>Fe<sub>2</sub>PMe(CO) structures.

Table S4. Distance table for the lowest-lying Cp<sub>2</sub>Fe<sub>2</sub>PMe(CO)<sub>2</sub> structures.

Table S5. Distance table for the lowest-lying Cp<sub>2</sub>Fe<sub>2</sub>PMe(CO)<sub>3</sub> structures.

Table S6. Distance table for the lowest-lying Cp<sub>2</sub>Fe<sub>2</sub>PMe(CO)<sub>4</sub> structures.

Table S7. Orbital energies and HOMO/LUMO gaps.

Complete Gaussian09 Reference (reference 20)

Gaussian 09, Revision E.01, M. J. Frisch, G. W. Trucks, H. B. Schlegel, G. E. Scuseria, M. A. Robb, J. R. Cheeseman, G. Scalmani, V. Barone, B. Mennucci, G. A. Petersson, H. Nakatsuji, M. Caricato, X. Li, H. P. Hratchian, A. F. Izmaylov, J. Bloino, G. Zheng, J. L. Sonnenberg, M. Hada, M. Ehara, K. Toyota, R. Fukuda, J. Hasegawa, M. Ishida, T. Nakajima, Y. Honda, O. Kitao, H. Nakai, T. Vreven, J. A. Montgomery, Jr., J. E. Peralta, F. Ogliaro, M. Bearpark, J. J. Heyd, E. Brothers, K. N. Kudin, V. N. Staroverov, T. Keith, R. Kobayashi, J. Normand, K. Raghavachari, A. Rendell, J. C. Burant, S. S. Iyengar, J. Tomasi, M. Cossi, N. Rega, J. M. Millam, M. Klene, J. E. Knox, J. B. Cross, V. Bakken, C. Adamo, J. Jaramillo, R. Gomperts, R. E. Stratmann, O. Yazyev, A. J. Austin, R. Cammi, C. Pomelli, J. W. Ochterski, R. L. Martin, K. Morokuma, V. G. Zakrzewski, G. A. Voth, P. Salvador, J. J. Dannenberg, S. Dapprich, A. D. Daniels, O. Farkas, J. B. Foresman, J. V. Ortiz, J. Cioslowski, and D. J. Fox, Gaussian, Inc., Wallingford CT, 2013.

Table S1. The initial  $(\text{Me}_6\text{C}_6)_2\text{Mn}_2(\text{CO})_n$  structures:

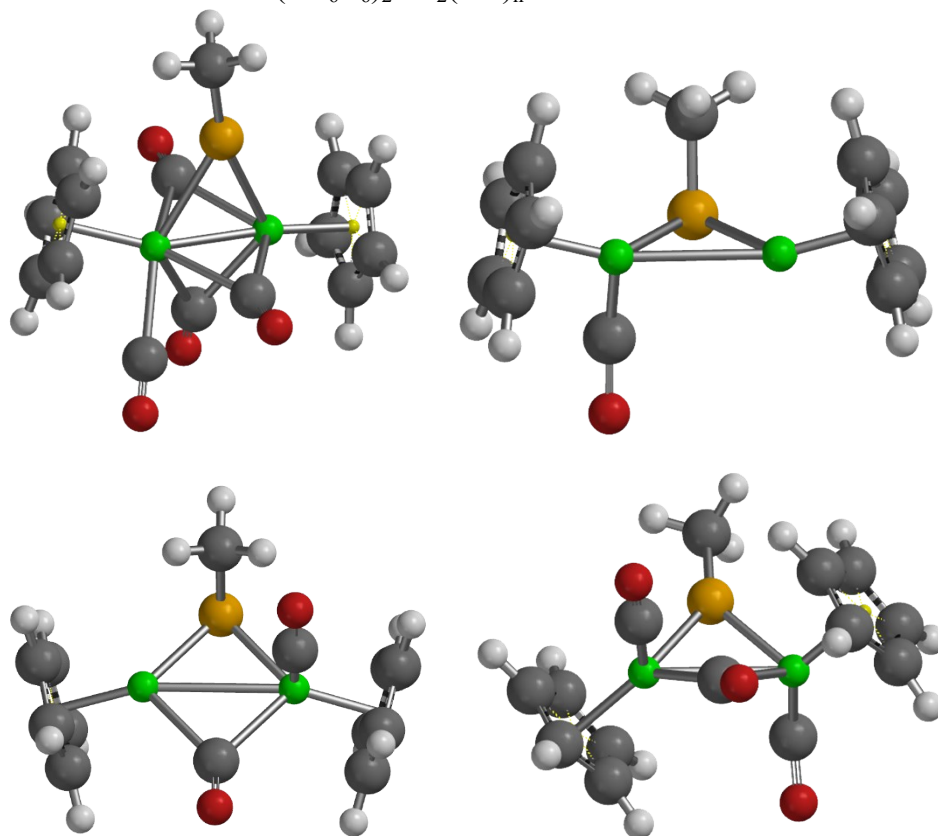

Table S2. Distance matrix for the lowest energy  $\text{MePcP}_2\text{Ru}_2$  structures as optimized at the PBE0/def2TZVP level. Included are the ranking order, spin multiplicity (S, T or Q), total energy (in a.u.), relative energy (in kcal/mol), symmetry point group Wiberg bond indices for the Fe-Fe bonds, Mulliken charges and the spin density (Cp moieties are omitted for clarity).

|                                            |      |          |          |          |          |          |  |
|--------------------------------------------|------|----------|----------|----------|----------|----------|--|
| <p>1S -957.512043 0.00 C1<br/>WBI 0.86</p> |      | 1        | 2        | 3        | 4        | 5        |  |
|                                            | 1 Ru | 0.000000 |          |          |          |          |  |
|                                            | 2 Ru | 2.463203 | 0.000000 |          |          |          |  |
|                                            | 3 H  | 2.915267 | 4.722565 | 0.000000 |          |          |  |
|                                            | 4 C  | 2.172637 | 4.164049 | 1.078778 | 0.000000 |          |  |
|                                            | 5 C  | 2.173074 | 4.563865 | 2.238651 | 1.424658 | 0.000000 |  |
|                                            | 6 H  | 2.951259 | 3.548027 | 2.695578 | 2.238210 | 3.345451 |  |
|                                            | 7 H  | 2.885104 | 5.347308 | 2.694027 | 2.234267 | 1.079314 |  |
|                                            | 8 C  | 2.176872 | 4.204159 | 3.352780 | 2.309869 | 1.424126 |  |
|                                            | 9 H  | 2.918824 | 4.786295 | 4.362976 | 3.352943 | 2.238388 |  |
|                                            | 10 C | 2.202451 | 3.524145 | 3.348165 | 2.305991 | 2.301690 |  |
|                                            | 11 H | 2.951286 | 3.597963 | 4.357765 | 3.349053 | 3.344659 |  |
|                                            | 12 C | 2.201075 | 3.495703 | 2.239616 | 1.427699 | 2.302336 |  |
|                                            | 13 H | 4.800379 | 2.859878 | 6.574336 | 6.379488 | 6.909567 |  |

|                  |      |          |          |          |          |          |
|------------------|------|----------|----------|----------|----------|----------|
| Charge densities | 14 C | 4.386583 | 2.112407 | 6.331514 | 6.000421 | 6.524620 |
| 1                | 15 C | 4.397960 | 2.149353 | 5.921243 | 5.615916 | 6.369020 |
| 1 Ru             | 16 H | 4.798024 | 2.860503 | 7.408621 | 6.834501 | 6.910031 |
| 2 Ru             | 17 H | 4.810826 | 2.905078 | 5.799812 | 5.671460 | 6.620099 |
| 4 C              | 18 C | 4.417687 | 2.178856 | 6.190355 | 5.670792 | 6.288935 |
| 5 C              | 19 H | 4.792049 | 2.910539 | 6.249977 | 5.712797 | 6.414158 |
| 8 C              | 20 C | 4.396443 | 2.149940 | 6.710203 | 6.056358 | 6.370368 |
| 10 C             | 21 H | 4.806830 | 2.904977 | 7.240025 | 6.468772 | 6.621019 |
| 12 C             | 22 C | 4.385800 | 2.113334 | 6.801421 | 6.260139 | 6.525504 |
| 14 C             | 23 P | 2.101739 | 2.334732 | 4.480614 | 4.058253 | 4.008928 |
| 15 C             | 24 C | 3.919917 | 3.648497 | 6.052210 | 5.776846 | 5.671390 |
| 18 C             | 25 H | 4.326015 | 4.561474 | 6.243662 | 6.025597 | 5.755942 |
| 20 C             | 26 H | 4.461873 | 3.832191 | 6.884073 | 6.488105 | 6.298249 |
| 22 C             | 27 H | 4.447088 | 3.860479 | 6.261330 | 6.134144 | 6.253516 |
| 23 P             | 6    | 7        | 8        | 9        | 10       |          |
| 24 C             | 6 H  | 0.000000 |          |          |          |          |
|                  | 7 H  | 4.355216 | 0.000000 |          |          |          |
|                  | 8 C  | 3.349085 | 2.234081 | 0.000000 |          |          |
|                  | 9 H  | 4.357507 | 2.694244 | 1.078796 | 0.000000 |          |
|                  | 10 C | 2.232121 | 3.344727 | 1.427042 | 2.238680 | 0.000000 |
|                  | 11 H | 2.687916 | 4.354432 | 2.237299 | 2.693925 | 1.079228 |
|                  | 12 C | 1.079253 | 3.345305 | 2.306072 | 3.348082 | 1.420165 |
|                  | 13 H | 5.856078 | 7.481944 | 6.857444 | 7.424539 | 6.316213 |
|                  | 14 C | 5.231710 | 7.212511 | 6.293858 | 6.845369 | 5.614185 |
|                  | 15 C | 4.380361 | 7.194167 | 6.126894 | 6.808754 | 5.181634 |
|                  | 16 H | 6.376311 | 7.504236 | 6.366775 | 6.570931 | 5.950282 |
|                  | 17 H | 4.334285 | 7.438612 | 6.556040 | 7.350784 | 5.565973 |
|                  | 18 C | 4.202603 | 7.211586 | 5.748472 | 6.321797 | 4.667485 |
|                  | 19 H | 3.923856 | 7.412550 | 5.813913 | 6.421772 | 4.564977 |
|                  | 20 C | 4.962286 | 7.214893 | 5.657908 | 6.014593 | 4.798621 |
|                  | 21 H | 5.387804 | 7.474873 | 5.704162 | 5.899521 | 4.873799 |
|                  | 22 C | 5.544316 | 7.225337 | 6.015990 | 6.368293 | 5.399494 |
|                  | 23 P | 4.671790 | 4.351645 | 4.063064 | 4.485493 | 4.175818 |
|                  | 24 C | 6.416776 | 5.812232 | 5.783905 | 6.061372 | 5.987896 |
|                  | 25 H | 6.999427 | 5.691877 | 6.006233 | 6.204919 | 6.441165 |
|                  | 26 H | 6.950228 | 6.495545 | 6.185127 | 6.331668 | 6.343979 |
|                  | 27 H | 6.608899 | 6.433168 | 6.479454 | 6.883602 | 6.534943 |
|                  | 11   | 12       | 13       | 14       | 15       |          |
|                  | 11 H | 0.000000 |          |          |          |          |
|                  | 12 C | 2.231976 | 0.000000 |          |          |          |
|                  | 13 H | 6.449410 | 6.001456 | 0.000000 |          |          |
|                  | 14 C | 5.613987 | 5.413994 | 1.078984 | 0.000000 |          |
|                  | 15 C | 5.111869 | 4.813199 | 2.236757 | 1.428616 | 0.000000 |
|                  | 16 H | 5.780355 | 6.262147 | 2.711406 | 2.247202 | 3.358930 |
|                  | 17 H | 5.597914 | 4.933144 | 2.694174 | 2.241258 | 1.079030 |
|                  | 18 C | 4.320184 | 4.609159 | 3.341317 | 2.299368 | 1.421760 |

|                                                                                                                                                      |                                                   |
|------------------------------------------------------------------------------------------------------------------------------------------------------|---------------------------------------------------|
|                                                                                                                                                      | 19 H 4.090690 4.485955 4.350521 3.342437 2.229843 |
|                                                                                                                                                      | 20 C 4.376655 5.089486 3.357154 2.313255 2.313781 |
|                                                                                                                                                      | 21 H 4.261885 5.429709 4.368365 3.356837 3.356074 |
|                                                                                                                                                      | 22 C 5.215397 5.568427 2.246513 1.432514 2.314886 |
|                                                                                                                                                      | 23 P 4.671886 4.174236 3.468691 3.399817 4.073920 |
|                                                                                                                                                      | 24 C 6.419134 5.985026 3.361688 3.734989 4.856951 |
|                                                                                                                                                      | 25 H 6.975212 6.453606 4.398331 4.813175 5.888852 |
|                                                                                                                                                      | 26 H 6.615727 6.528665 3.454006 3.725537 4.987260 |
|                                                                                                                                                      | 27 H 6.976863 6.328049 2.802734 3.456575 4.601979 |
|                                                                                                                                                      | 16 17 18 19 20                                    |
|                                                                                                                                                      | 16 H 0.000000                                     |
|                                                                                                                                                      | 17 H 4.370187 0.000000                            |
|                                                                                                                                                      | 18 C 3.342322 2.236696 0.000000                   |
|                                                                                                                                                      | 19 H 4.351285 2.688510 1.080680 0.000000          |
|                                                                                                                                                      | 20 C 2.236652 3.356078 1.422207 2.230283 0.000000 |
|                                                                                                                                                      | 21 H 2.693292 4.364664 2.237151 2.688988 1.079090 |
|                                                                                                                                                      | 22 C 1.079017 3.358436 2.300316 3.343216 1.428234 |
|                                                                                                                                                      | 23 P 3.529875 4.633819 4.469080 5.243605 4.118793 |
|                                                                                                                                                      | 24 C 3.496398 5.425736 5.477404 6.426651 4.937407 |
|                                                                                                                                                      | 25 H 4.498185 6.402948 6.499487 7.412700 5.952992 |
|                                                                                                                                                      | 26 H 2.866661 5.711916 5.444830 6.440568 4.658605 |
|                                                                                                                                                      | 27 H 3.710823 5.024122 5.471982 6.450981 5.120913 |
|                                                                                                                                                      | 21 22 23 24 25                                    |
|                                                                                                                                                      | 21 H 0.000000                                     |
|                                                                                                                                                      | 22 C 2.240386 0.000000                            |
|                                                                                                                                                      | 23 P 4.707102 3.433280 0.000000                   |
|                                                                                                                                                      | 24 C 5.560492 3.799815 1.830439 0.000000          |
|                                                                                                                                                      | 25 H 6.513230 4.861776 2.423058 1.091347 0.000000 |
|                                                                                                                                                      | 26 H 5.161590 3.452194 2.435402 1.092101 1.777739 |
|                                                                                                                                                      | 27 H 5.895376 3.882326 2.432674 1.092222 1.776984 |
|                                                                                                                                                      | 26 27                                             |
|                                                                                                                                                      | 26 H 0.000000                                     |
|                                                                                                                                                      | 27 H 1.778321 0.000000                            |
|                                                                                                                                                      | 1 2 3 4 5                                         |
|                                                                                                                                                      | 1 Ru 0.000000                                     |
|                                                                                                                                                      | 2 Ru 2.840223 0.000000                            |
|                                                                                                                                                      | 3 P 2.248732 2.193507 0.000000                    |
|                                                                                                                                                      | 4 C 3.545716 3.743269 1.848210 0.000000           |
|                                                                                                                                                      | 5 H 3.488348 4.323100 2.468565 1.092564 0.000000  |
|                                                                                                                                                      | 6 H 4.261980 3.835818 2.444029 1.091316 1.779146  |
|                                                                                                                                                      | 7 H 4.214418 4.470953 2.439936 1.092386 1.769069  |
|                                                                                                                                                      | 8 H 2.923190 3.531529 4.582746 6.002841 5.966508  |
|                                                                                                                                                      | 9 C 2.163886 3.453761 4.082425 5.559348 5.512414  |
|                                                                                                                                                      | 10 C 2.216680 4.466288 4.457048 5.662470 5.383882 |
|                                                                                                                                                      | 11 H 2.880189 2.697877 3.750843 5.576206 5.943695 |
|                                                                                                                                                      | 12 H 2.970456 5.238729 5.172460 6.144553 5.697778 |
| 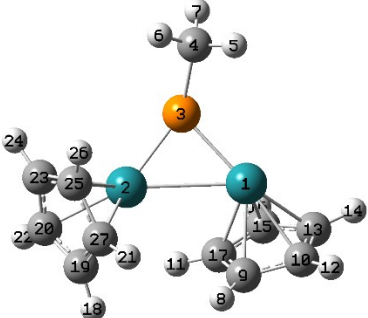 <p>2S -957.494547 10.97<br/>WBI 0.42</p> <p>Charge densities</p> |                                                   |

|                |      |          |          |          |          |          |
|----------------|------|----------|----------|----------|----------|----------|
| 1              | 13 C | 2.168676 | 4.686329 | 4.220212 | 5.435322 | 5.224050 |
| 1 Ru 0.375014  | 14 H | 2.911152 | 5.593843 | 4.791007 | 5.755932 | 5.423255 |
| 2 Ru 0.420114  | 15 C | 2.088034 | 3.894809 | 3.649349 | 5.180840 | 5.263008 |
| 3 P -0.344417  | 16 H | 2.829868 | 4.325969 | 3.852395 | 5.345583 | 5.542958 |
| 4 C -0.003341  | 17 C | 2.087314 | 2.979931 | 3.549878 | 5.265194 | 5.448412 |
| 9 C -0.030133  | 18 H | 4.674846 | 2.963384 | 5.059902 | 6.654833 | 7.086706 |
| 10 C -0.013227 | 19 C | 4.411487 | 2.197637 | 4.381615 | 5.856921 | 6.357882 |
| 13 C -0.069732 | 20 C | 4.868521 | 2.163441 | 4.201351 | 5.617571 | 6.331563 |
| 15 C -0.015914 | 21 H | 4.183156 | 2.897942 | 4.526958 | 5.563398 | 5.730502 |
| 17 C -0.002525 | 22 H | 5.481762 | 2.929182 | 4.779648 | 6.267094 | 7.055676 |
| 19 C -0.045853 | 23 C | 4.926335 | 2.117976 | 3.765500 | 4.795488 | 5.559780 |
| 20 C -0.055744 | 24 H | 5.574122 | 2.862413 | 4.031337 | 4.803186 | 5.692367 |
| 23 C -0.061841 | 25 C | 4.470335 | 2.085036 | 3.639406 | 4.480090 | 5.013971 |
| 25 C -0.073805 | 26 H | 4.818269 | 2.835009 | 3.834981 | 4.217935 | 4.665861 |
| 27 C -0.078597 | 27 C | 4.126361 | 2.138568 | 4.049083 | 5.210949 | 5.578615 |
|                | 6    | 7        | 8        | 9        | 10       |          |
|                | 6 H  | 0.000000 |          |          |          |          |
|                | 7 H  | 1.774920 | 0.000000 |          |          |          |
|                | 8 H  | 6.371683 | 6.855590 | 0.000000 |          |          |
|                | 9 C  | 6.092888 | 6.307197 | 1.078225 | 0.000000 |          |
|                | 10 C | 6.352030 | 6.340133 | 2.226070 | 1.413112 | 0.000000 |
|                | 11 H | 6.063160 | 6.112297 | 2.717013 | 2.257469 | 3.351499 |
|                | 12 H | 6.794653 | 6.877306 | 2.678126 | 2.222971 | 1.080114 |
|                | 13 C | 6.293746 | 5.892086 | 3.345841 | 2.304038 | 1.423144 |
|                | 14 H | 6.702820 | 6.089926 | 4.353990 | 3.346173 | 2.237165 |
|                | 15 C | 5.996889 | 5.557609 | 3.365547 | 2.322818 | 2.308992 |
|                | 16 H | 6.216800 | 5.518222 | 4.378992 | 3.368017 | 3.351547 |
|                | 17 C | 5.868763 | 5.837045 | 2.250232 | 1.441424 | 2.309032 |
|                | 18 H | 6.692556 | 7.422417 | 3.106316 | 3.641193 | 5.051913 |
|                | 19 C | 5.783773 | 6.637944 | 3.415961 | 3.871251 | 5.223708 |
|                | 20 C | 5.464641 | 6.239769 | 4.596137 | 4.820765 | 6.100484 |
|                | 21 H | 5.402901 | 6.565187 | 2.927527 | 3.671464 | 4.750441 |
|                | 22 H | 6.175932 | 6.754449 | 5.253527 | 5.384018 | 6.668486 |
|                | 23 C | 4.418812 | 5.444396 | 5.155157 | 5.355817 | 6.487463 |
|                | 24 H | 4.311819 | 5.294252 | 6.152890 | 6.263123 | 7.321881 |
|                | 25 C | 4.052817 | 5.346782 | 4.501047 | 4.845980 | 5.894052 |
|                | 26 H | 3.595620 | 5.131649 | 5.102868 | 5.438420 | 6.322582 |
|                | 27 C | 5.014053 | 6.132115 | 3.318657 | 3.871236 | 5.056748 |
|                | 11   | 12       | 13       | 14       | 15       |          |
|                | 11 H | 0.000000 |          |          |          |          |
|                | 12 H | 4.363039 | 0.000000 |          |          |          |
|                | 13 C | 3.355179 | 2.232363 | 0.000000 |          |          |
|                | 14 H | 4.365194 | 2.689748 | 1.079832 | 0.000000 |          |
|                | 15 C | 2.251509 | 3.350520 | 1.425446 | 2.232895 | 0.000000 |
|                | 16 H | 2.713448 | 4.358969 | 2.238016 | 2.688651 | 1.079297 |
|                | 17 C | 1.081645 | 3.352767 | 2.313187 | 3.356205 | 1.440286 |

|                                                                                     |      |          |          |          |          |          |
|-------------------------------------------------------------------------------------|------|----------|----------|----------|----------|----------|
|                                                                                     | 18 H | 2.841764 | 5.732307 | 5.690320 | 6.766635 | 4.934207 |
|                                                                                     | 19 C | 3.069873 | 5.903370 | 5.803319 | 6.850240 | 5.032463 |
|                                                                                     | 20 C | 3.500724 | 6.887028 | 6.412340 | 7.403482 | 5.431248 |
|                                                                                     | 21 H | 4.173875 | 5.056251 | 5.711576 | 6.678855 | 5.464158 |
|                                                                                     | 22 H | 3.682672 | 7.537424 | 6.832510 | 7.809067 | 5.697652 |
|                                                                                     | 23 C | 4.374716 | 7.187501 | 6.796475 | 7.711439 | 5.941390 |
|                                                                                     | 24 H | 5.150619 | 8.045879 | 7.496697 | 8.348427 | 6.585210 |
|                                                                                     | 25 C | 4.506128 | 6.422131 | 6.432183 | 7.337980 | 5.853197 |
|                                                                                     | 26 H | 5.375692 | 6.730765 | 6.885632 | 7.710783 | 6.456744 |
|                                                                                     | 27 C | 3.775450 | 5.553326 | 5.797980 | 6.788183 | 5.297488 |
|                                                                                     |      | 16       | 17       | 18       | 19       | 20       |
|                                                                                     | 16 H | 0.000000 |          |          |          |          |
|                                                                                     | 17 C | 2.253472 | 0.000000 |          |          |          |
|                                                                                     | 18 H | 5.533265 | 3.514800 | 0.000000 |          |          |
|                                                                                     | 19 C | 5.591499 | 3.689275 | 1.080655 | 0.000000 |          |
|                                                                                     | 20 C | 5.750202 | 4.274717 | 2.238127 | 1.427516 | 0.000000 |
|                                                                                     | 21 H | 6.289463 | 4.232442 | 2.689695 | 2.233010 | 3.351048 |
|                                                                                     | 22 H | 5.855410 | 4.618048 | 2.693798 | 2.239390 | 1.079675 |
|                                                                                     | 23 C | 6.263941 | 4.932345 | 3.353934 | 2.310771 | 1.426324 |
|                                                                                     | 24 H | 6.773870 | 5.720088 | 4.362776 | 3.353526 | 2.238071 |
|                                                                                     | 25 C | 6.384192 | 4.804279 | 3.354570 | 2.309317 | 2.309068 |
|                                                                                     | 26 H | 7.006236 | 5.528658 | 4.362862 | 3.350883 | 3.352860 |
|                                                                                     | 27 C | 5.982958 | 4.052153 | 2.230424 | 1.418135 | 2.306953 |
|                                                                                     |      | 21       | 22       | 23       | 24       | 25       |
|                                                                                     | 21 H | 0.000000 |          |          |          |          |
|                                                                                     | 22 H | 4.359805 | 0.000000 |          |          |          |
|                                                                                     | 23 C | 3.360313 | 2.237026 | 0.000000 |          |          |
|                                                                                     | 24 H | 4.371941 | 2.693257 | 1.079189 | 0.000000 |          |
|                                                                                     | 25 C | 2.247703 | 3.352559 | 1.430816 | 2.243586 | 0.000000 |
|                                                                                     | 26 H | 2.704305 | 4.363530 | 2.244131 | 2.705112 | 1.079170 |
|                                                                                     | 27 C | 1.079409 | 3.349172 | 2.317808 | 3.362230 | 1.438252 |
|                                                                                     |      | 26       | 27       |          |          |          |
|                                                                                     | 26 H | 0.000000 |          |          |          |          |
|                                                                                     | 27 C | 2.248625 | 0.000000 |          |          |          |
|                                                                                     |      | 1        | 2        | 3        | 4        | 5        |
|                                                                                     | 1 Ru | 0.000000 |          |          |          |          |
|                                                                                     | 2 Ru | 2.727153 | 0.000000 |          |          |          |
|                                                                                     | 3 P  | 2.157054 | 2.157057 | 0.000000 |          |          |
|                                                                                     | 4 C  | 3.751766 | 3.751740 | 1.823939 | 0.000000 |          |
|                                                                                     | 5 H  | 4.212730 | 4.212422 | 2.417752 | 1.092386 | 0.000000 |
|                                                                                     | 6 H  | 4.510099 | 3.934702 | 2.425198 | 1.091109 | 1.776482 |
|                                                                                     | 7 H  | 3.934615 | 4.510219 | 2.425210 | 1.091108 | 1.776488 |
|                                                                                     | 8 H  | 2.967861 | 4.839514 | 5.093306 | 6.713272 | 7.111952 |
|                                                                                     | 9 C  | 2.237040 | 4.574823 | 4.390129 | 5.878558 | 6.270758 |
|                                                                                     | 10 C | 2.181508 | 4.612012 | 4.074830 | 5.370890 | 5.536103 |
|                                                                                     | 11 H | 2.933904 | 5.001943 | 4.628242 | 5.915710 | 6.626991 |
| 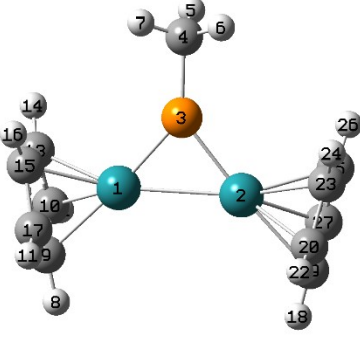 |      |          |          |          |          |          |
| 3T -957.490781 13.34 C2                                                             |      |          |          |          |          |          |

|                            |      |          |          |          |          |          |
|----------------------------|------|----------|----------|----------|----------|----------|
| WBI 0.57                   | 12 H | 2.931712 | 4.970208 | 4.621287 | 5.894908 | 5.887340 |
|                            | 13 C | 2.159287 | 4.771419 | 3.583036 | 4.498495 | 4.691077 |
| Charges and spin densities | 14 H | 2.896508 | 5.240069 | 3.772149 | 4.302178 | 4.283888 |
| 1 2                        | 15 C | 2.160677 | 4.782620 | 3.586403 | 4.507792 | 5.003088 |
| 1 Ru                       | 16 H | 2.898399 | 5.259308 | 3.778106 | 4.320550 | 4.909551 |
| 2 Ru                       | 17 C | 2.183512 | 4.630668 | 4.079433 | 5.383297 | 5.962101 |
| 3 P                        | 18 H | 4.839545 | 2.967865 | 5.093318 | 6.713242 | 7.111504 |
| 4 C                        | 19 C | 4.574843 | 2.237043 | 4.390133 | 5.878514 | 6.270255 |
| 9 C                        | 20 C | 4.630619 | 2.183508 | 4.079518 | 5.383409 | 5.961754 |
| 10 C                       | 21 H | 4.970315 | 2.931714 | 4.621132 | 5.894562 | 5.886487 |
| 13 C                       | 22 H | 5.001860 | 2.933904 | 4.628395 | 5.915956 | 6.626814 |
| 15 C                       | 23 C | 4.782571 | 2.160664 | 3.586437 | 4.507823 | 5.002600 |
| 17 C                       | 24 H | 5.259227 | 2.898389 | 3.778185 | 4.320689 | 4.909174 |
| 19 C                       | 25 C | 4.771455 | 2.159295 | 3.582963 | 4.498292 | 4.690308 |
| 20 C                       | 26 H | 5.240126 | 2.896517 | 3.772020 | 4.301838 | 4.282924 |
| 23 C                       | 27 C | 4.612079 | 2.181513 | 4.074737 | 5.370663 | 5.535366 |
| 25 C                       | 6    | 7        | 8        | 9        | 10       |          |
| 27 C                       | 6 H  | 0.000000 |          |          |          |          |
|                            | 7 H  | 1.782077 | 0.000000 |          |          |          |
|                            | 8 H  | 7.464102 | 6.794444 | 0.000000 |          |          |
|                            | 9 C  | 6.695822 | 5.867561 | 1.080383 | 0.000000 |          |
|                            | 10 C | 6.312772 | 5.390731 | 2.229581 | 1.419765 | 0.000000 |
|                            | 11 H | 6.547343 | 5.669819 | 2.688293 | 2.234057 | 3.346600 |
|                            | 12 H | 6.848532 | 6.031050 | 2.688661 | 2.234359 | 1.079016 |
|                            | 13 C | 5.505367 | 4.298605 | 3.348420 | 2.304568 | 1.432939 |
|                            | 14 H | 5.375832 | 4.054274 | 4.354814 | 3.344967 | 2.239917 |
|                            | 15 C | 5.384837 | 4.135395 | 3.348367 | 2.304549 | 2.308498 |
|                            | 16 H | 5.138279 | 3.717338 | 4.354730 | 3.344957 | 3.353791 |
|                            | 17 C | 6.141829 | 5.179514 | 2.229445 | 1.419571 | 2.303650 |
|                            | 18 H | 6.794575 | 7.464289 | 5.358275 | 5.697017 | 6.116515 |
|                            | 19 C | 5.867703 | 6.696002 | 5.697008 | 5.839327 | 6.113072 |
|                            | 20 C | 5.179717 | 6.142291 | 6.142602 | 6.141530 | 6.505877 |
|                            | 21 H | 6.031094 | 6.848195 | 6.235560 | 6.283786 | 6.076836 |
|                            | 22 H | 5.670054 | 6.548032 | 6.282349 | 6.334673 | 6.901639 |
|                            | 23 C | 4.135599 | 5.385183 | 6.854094 | 6.655044 | 6.763552 |
|                            | 24 H | 3.717595 | 5.138807 | 7.536675 | 7.240478 | 7.348847 |
|                            | 25 C | 4.298738 | 5.505321 | 6.839855 | 6.638963 | 6.499797 |
|                            | 26 H | 4.054368 | 5.375574 | 7.512169 | 7.212490 | 6.881431 |
|                            | 27 C | 5.390824 | 6.312654 | 6.116807 | 6.113269 | 6.054657 |
|                            | 11   | 12       | 13       | 14       | 15       |          |
|                            | 11 H | 0.000000 |          |          |          |          |
|                            | 12 H | 4.356344 | 0.000000 |          |          |          |
|                            | 13 C | 3.350069 | 2.242907 | 0.000000 |          |          |
|                            | 14 H | 4.362814 | 2.693710 | 1.078780 | 0.000000 |          |
|                            | 15 C | 2.242628 | 3.350382 | 1.421836 | 2.237975 | 0.000000 |
|                            | 16 H | 2.693400 | 4.363222 | 2.238111 | 2.704261 | 1.078832 |

|                                                                                                                                 |      |          |          |          |          |          |
|---------------------------------------------------------------------------------------------------------------------------------|------|----------|----------|----------|----------|----------|
|                                                                                                                                 | 17 C | 1.079041 | 3.346619 | 2.308143 | 3.353354 | 1.432673 |
|                                                                                                                                 | 18 H | 6.282921 | 6.235009 | 6.839702 | 7.511893 | 6.854293 |
|                                                                                                                                 | 19 C | 6.335042 | 6.283424 | 6.638856 | 7.212298 | 6.655183 |
|                                                                                                                                 | 20 C | 6.161167 | 6.878529 | 6.776272 | 7.348368 | 6.547486 |
|                                                                                                                                 | 21 H | 7.384188 | 5.906730 | 6.651426 | 6.968143 | 7.117244 |
|                                                                                                                                 | 22 H | 6.017714 | 7.383716 | 7.153381 | 7.817375 | 6.723141 |
|                                                                                                                                 | 23 C | 6.723014 | 7.117164 | 6.807026 | 7.189184 | 6.675357 |
|                                                                                                                                 | 24 H | 7.053313 | 7.794292 | 7.203490 | 7.529499 | 6.950184 |
|                                                                                                                                 | 25 C | 7.153439 | 6.651532 | 6.638452 | 6.897897 | 6.807034 |
|                                                                                                                                 | 26 H | 7.817369 | 6.968456 | 6.897935 | 6.992214 | 7.189142 |
|                                                                                                                                 | 27 C | 6.901973 | 6.076764 | 6.499720 | 6.881226 | 6.763630 |
|                                                                                                                                 |      | 16       | 17       | 18       | 19       | 20       |
|                                                                                                                                 | 16 H | 0.000000 |          |          |          |          |
|                                                                                                                                 | 17 C | 2.239716 | 0.000000 |          |          |          |
|                                                                                                                                 | 18 H | 7.537000 | 6.142925 | 0.000000 |          |          |
|                                                                                                                                 | 19 C | 7.240706 | 6.141740 | 1.080383 | 0.000000 |          |
|                                                                                                                                 | 20 C | 6.942517 | 6.114488 | 2.229448 | 1.419572 | 0.000000 |
|                                                                                                                                 | 21 H | 7.794312 | 6.878868 | 2.688656 | 2.234359 | 3.346620 |
|                                                                                                                                 | 22 H | 7.053651 | 6.161101 | 2.688299 | 2.234059 | 1.079041 |
|                                                                                                                                 | 23 C | 6.950229 | 6.547390 | 3.348369 | 2.304550 | 1.432675 |
|                                                                                                                                 | 24 H | 7.062018 | 6.942289 | 4.354733 | 3.344958 | 2.239718 |
|                                                                                                                                 | 25 C | 7.203455 | 6.776331 | 3.348419 | 2.304568 | 2.308145 |
|                                                                                                                                 | 26 H | 7.529342 | 7.348408 | 4.354814 | 3.344969 | 3.353357 |
|                                                                                                                                 | 27 C | 7.348910 | 6.506107 | 2.229578 | 1.419765 | 2.303651 |
|                                                                                                                                 |      | 21       | 22       | 23       | 24       | 25       |
|                                                                                                                                 | 21 H | 0.000000 |          |          |          |          |
|                                                                                                                                 | 22 H | 4.356345 | 0.000000 |          |          |          |
|                                                                                                                                 | 23 C | 3.350382 | 2.242629 | 0.000000 |          |          |
|                                                                                                                                 | 24 H | 4.363223 | 2.693400 | 1.078833 | 0.000000 |          |
|                                                                                                                                 | 25 C | 2.242907 | 3.350071 | 1.421836 | 2.238113 | 0.000000 |
|                                                                                                                                 | 26 H | 2.693712 | 4.362817 | 2.237976 | 2.704263 | 1.078782 |
|                                                                                                                                 | 27 C | 1.079016 | 3.346601 | 2.308497 | 3.353791 | 1.432937 |
|                                                                                                                                 |      | 26       | 27       |          |          |          |
|                                                                                                                                 | 26 H | 0.000000 |          |          |          |          |
|                                                                                                                                 | 27 C | 2.239918 | 0.000000 |          |          |          |
|                                                                                                                                 |      | 1        | 2        | 3        | 4        | 5        |
|                                                                                                                                 | 1 Ru | 0.000000 |          |          |          |          |
|                                                                                                                                 | 2 Ru | 2.498216 | 0.000000 |          |          |          |
|                                                                                                                                 | 3 P  | 2.226778 | 2.144103 | 0.000000 |          |          |
|                                                                                                                                 | 4 C  | 3.656456 | 3.916080 | 1.829803 | 0.000000 |          |
|                                                                                                                                 | 5 H  | 3.953072 | 4.518055 | 2.424538 | 1.092356 | 0.000000 |
|                                                                                                                                 | 6 H  | 4.528969 | 4.244501 | 2.433292 | 1.091008 | 1.780944 |
|                                                                                                                                 | 7 H  | 3.825383 | 4.443608 | 2.427453 | 1.092164 | 1.773785 |
|                                                                                                                                 | 8 H  | 2.901288 | 4.396430 | 4.633771 | 5.790811 | 6.303204 |
|                                                                                                                                 | 9 C  | 2.188007 | 4.196060 | 4.139558 | 5.248975 | 5.607429 |
|                                                                                                                                 | 10 C | 2.297771 | 4.379540 | 4.518102 | 5.774770 | 5.934893 |
| 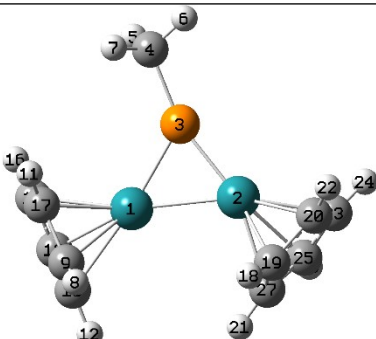 <p>4T -957.489244 14.30 C2<br/>WBI 0.82</p> |      |          |          |          |          |          |



| Charges and spin densities |           |           | 11 H     | 12 H     | 13 C     | 14 H     | 15 C     | 16 H     | 17 C | 18 H | 19 C | 20 C | 21 H | 22 H | 23 C | 24 H | 25 C | 26 H | 27 C |  |
|----------------------------|-----------|-----------|----------|----------|----------|----------|----------|----------|------|------|------|------|------|------|------|------|------|------|------|--|
|                            | 1         | 2         |          |          |          |          |          |          |      |      |      |      |      |      |      |      |      |      |      |  |
| 1 Ru                       | 0.362602  | 1.604958  | 2.912201 | 4.863593 | 3.823164 | 4.120124 | 4.489674 |          |      |      |      |      |      |      |      |      |      |      |      |  |
| 2 Ru                       | 0.291252  | 0.417883  | 3.028275 | 4.681535 | 5.230225 | 6.648827 | 6.825217 |          |      |      |      |      |      |      |      |      |      |      |      |  |
| 3 P                        | -0.242232 | -0.117109 | 13 C     | 2.323713 | 4.689608 | 4.293904 | 5.272934 | 5.185513 |      |      |      |      |      |      |      |      |      |      |      |  |
| 4 C                        | 0.027262  | -0.005531 | 14 H     | 3.050063 | 5.197463 | 4.843358 | 5.795778 | 5.540665 |      |      |      |      |      |      |      |      |      |      |      |  |
| 9 C                        | -0.072552 | -0.023691 | 15 C     | 2.315815 | 4.787747 | 3.819864 | 4.385121 | 4.304287 |      |      |      |      |      |      |      |      |      |      |      |  |
| 10 C                       | -0.036255 | 0.088188  | 16 H     | 3.052883 | 5.381067 | 4.045647 | 4.192556 | 3.885970 |      |      |      |      |      |      |      |      |      |      |      |  |
| 13 C                       | -0.005830 | 0.007140  | 17 C     | 2.198394 | 4.465340 | 3.675279 | 4.330721 | 4.586566 |      |      |      |      |      |      |      |      |      |      |      |  |
| 15 C                       | -0.008821 | 0.021381  | 18 H     | 4.198084 | 2.900352 | 4.581932 | 6.147169 | 6.968224 |      |      |      |      |      |      |      |      |      |      |      |  |
| 17 C                       | -0.065527 | -0.015353 | 19 C     | 3.937689 | 2.164042 | 4.132871 | 5.804128 | 6.550260 |      |      |      |      |      |      |      |      |      |      |      |  |
| 19 C                       | -0.050564 | -0.006321 | 20 C     | 4.544000 | 2.189101 | 4.013510 | 5.514823 | 6.289072 |      |      |      |      |      |      |      |      |      |      |      |  |
| 20 C                       | -0.057015 | 0.016260  | 21 H     | 3.665750 | 2.945182 | 4.802878 | 6.623456 | 7.096690 |      |      |      |      |      |      |      |      |      |      |      |  |
| 23 C                       | -0.049558 | 0.033532  | 22 H     | 5.210308 | 2.922818 | 4.359869 | 5.604713 | 6.480919 |      |      |      |      |      |      |      |      |      |      |      |  |
| 25 C                       | -0.040030 | -0.013947 | 23 C     | 4.621638 | 2.204481 | 4.041868 | 5.589397 | 6.167831 |      |      |      |      |      |      |      |      |      |      |      |  |
| 27 C                       | -0.052732 | -0.007390 | 24 H     | 5.327426 | 2.934105 | 4.393983 | 5.726760 | 6.238224 |      |      |      |      |      |      |      |      |      |      |      |  |
|                            |           |           | 25 C     | 4.071157 | 2.177019 | 4.163219 | 5.903944 | 6.345587 |      |      |      |      |      |      |      |      |      |      |      |  |
|                            |           |           | 26 H     | 4.426714 | 2.915173 | 4.629268 | 6.320684 | 6.594807 |      |      |      |      |      |      |      |      |      |      |      |  |
|                            |           |           | 27 C     | 3.643500 | 2.194143 | 4.261172 | 6.072370 | 6.620744 |      |      |      |      |      |      |      |      |      |      |      |  |
|                            |           |           |          | 6        | 7        | 8        | 9        | 10       |      |      |      |      |      |      |      |      |      |      |      |  |
|                            |           |           | 6 H      | 0.000000 |          |          |          |          |      |      |      |      |      |      |      |      |      |      |      |  |
|                            |           |           | 7 H      | 1.781361 | 0.000000 |          |          |          |      |      |      |      |      |      |      |      |      |      |      |  |
|                            |           |           | 8 H      | 6.615416 | 5.473781 | 0.000000 |          |          |      |      |      |      |      |      |      |      |      |      |      |  |
|                            |           |           | 9 C      | 6.170703 | 4.997203 | 1.079318 | 0.000000 |          |      |      |      |      |      |      |      |      |      |      |      |  |
|                            |           |           | 10 C     | 6.731179 | 5.732091 | 2.232947 | 1.417889 | 0.000000 |      |      |      |      |      |      |      |      |      |      |      |  |
|                            |           |           | 11 H     | 5.061231 | 3.478442 | 2.703489 | 2.248212 | 3.348954 |      |      |      |      |      |      |      |      |      |      |      |  |
|                            |           |           | 12 H     | 7.554716 | 6.684810 | 2.697370 | 2.234165 | 1.079220 |      |      |      |      |      |      |      |      |      |      |      |  |
|                            |           |           | 13 C     | 6.302011 | 5.288004 | 3.331080 | 2.285859 | 1.417302 |      |      |      |      |      |      |      |      |      |      |      |  |
|                            |           |           | 14 H     | 6.806058 | 5.946048 | 4.340727 | 3.328464 | 2.224728 |      |      |      |      |      |      |      |      |      |      |      |  |
|                            |           |           | 15 C     | 5.462294 | 4.197126 | 3.353774 | 2.313118 | 2.311562 |      |      |      |      |      |      |      |      |      |      |      |  |
|                            |           |           | 16 H     | 5.281012 | 3.992460 | 4.366618 | 3.358574 | 3.352033 |      |      |      |      |      |      |      |      |      |      |      |  |
|                            |           |           | 17 C     | 5.333028 | 3.934142 | 2.250229 | 1.440356 | 2.308188 |      |      |      |      |      |      |      |      |      |      |      |  |
|                            |           |           | 18 H     | 6.416816 | 6.285313 | 4.037368 | 4.542931 | 5.064105 |      |      |      |      |      |      |      |      |      |      |      |  |
|                            |           |           | 19 C     | 6.033528 | 6.125322 | 4.483286 | 4.760435 | 5.062358 |      |      |      |      |      |      |      |      |      |      |      |  |
|                            |           |           | 20 C     | 5.496920 | 5.989834 | 5.621438 | 5.782539 | 6.100687 |      |      |      |      |      |      |      |      |      |      |      |  |
|                            |           |           | 21 H     | 7.121634 | 6.984191 | 4.172235 | 4.244499 | 3.936966 |      |      |      |      |      |      |      |      |      |      |      |  |
|                            |           |           | 22 H     | 5.416024 | 6.015420 | 6.148858 | 6.383914 | 6.877274 |      |      |      |      |      |      |      |      |      |      |      |  |
|                            |           |           | 23 C     | 5.575600 | 6.273610 | 6.247720 | 6.198807 | 6.226036 |      |      |      |      |      |      |      |      |      |      |      |  |
|                            |           |           | 24 H     | 5.550014 | 6.526546 | 7.200597 | 7.079582 | 7.079977 |      |      |      |      |      |      |      |      |      |      |      |  |
|                            |           |           | 25 C     | 6.134815 | 6.555694 | 5.665666 | 5.538725 | 5.298734 |      |      |      |      |      |      |      |      |      |      |      |  |
|                            |           |           | 26 H     | 6.593212 | 7.056249 | 6.243942 | 5.980380 | 5.497022 |      |      |      |      |      |      |      |      |      |      |      |  |
|                            |           |           | 27 C     | 6.435714 | 6.510214 | 4.544635 | 4.609457 | 4.499638 |      |      |      |      |      |      |      |      |      |      |      |  |
|                            |           |           |          | 11       | 12       | 13       | 14       | 15       |      |      |      |      |      |      |      |      |      |      |      |  |
|                            |           |           | 11 H     | 0.000000 |          |          |          |          |      |      |      |      |      |      |      |      |      |      |      |  |
|                            |           |           | 12 H     | 4.362869 | 0.000000 |          |          |          |      |      |      |      |      |      |      |      |      |      |      |  |
|                            |           |           | 13 C     | 3.327105 | 2.230747 | 0.000000 |          |          |      |      |      |      |      |      |      |      |      |      |      |  |
|                            |           |           | 14 H     | 4.336968 | 2.678666 | 1.080927 | 0.000000 |          |      |      |      |      |      |      |      |      |      |      |      |  |
|                            |           |           | 15 C     | 2.231298 | 3.352081 | 1.415952 | 2.223236 | 0.000000 |      |      |      |      |      |      |      |      |      |      |      |  |

|                                                                                     |      |          |          |          |          |          |
|-------------------------------------------------------------------------------------|------|----------|----------|----------|----------|----------|
|                                                                                     | 16 H | 2.695598 | 4.357324 | 2.229854 | 2.677926 | 1.078617 |
|                                                                                     | 17 C | 1.079402 | 3.354656 | 2.281964 | 3.324882 | 1.417357 |
|                                                                                     | 18 H | 5.640854 | 5.047779 | 6.038617 | 6.763576 | 6.240975 |
|                                                                                     | 19 C | 5.870706 | 5.033138 | 5.877746 | 6.477996 | 6.160505 |
|                                                                                     | 20 C | 6.529920 | 6.185308 | 6.691313 | 7.228350 | 6.834287 |
|                                                                                     | 21 H | 6.013372 | 3.510069 | 4.847797 | 5.219382 | 5.618851 |
|                                                                                     | 22 H | 6.854019 | 7.048011 | 7.449980 | 8.055144 | 7.428889 |
|                                                                                     | 23 C | 7.041625 | 6.252261 | 6.628008 | 6.965777 | 6.916707 |
|                                                                                     | 24 H | 7.746084 | 7.154042 | 7.331465 | 7.592533 | 7.560466 |
|                                                                                     | 25 C | 6.752012 | 5.163160 | 5.752405 | 5.986005 | 6.297809 |
|                                                                                     | 26 H | 7.268270 | 5.284719 | 5.798310 | 5.834117 | 6.488918 |
|                                                                                     | 27 C | 6.059413 | 4.285481 | 5.260957 | 5.672110 | 5.832959 |
|                                                                                     |      | 16       | 17       | 18       | 19       | 20       |
|                                                                                     | 16 H | 0.000000 |          |          |          |          |
|                                                                                     | 17 C | 2.233847 | 0.000000 |          |          |          |
|                                                                                     | 18 H | 7.108864 | 5.379199 | 0.000000 |          |          |
|                                                                                     | 19 C | 6.967313 | 5.508752 | 1.079318 | 0.000000 |          |
|                                                                                     | 20 C | 7.491430 | 6.273635 | 2.238050 | 1.430463 | 0.000000 |
|                                                                                     | 21 H | 6.527367 | 5.293973 | 2.698222 | 2.237702 | 3.355820 |
|                                                                                     | 22 H | 8.032495 | 6.759008 | 2.689552 | 2.239323 | 1.078941 |
|                                                                                     | 23 C | 7.495570 | 6.639656 | 3.342396 | 2.301458 | 1.416345 |
|                                                                                     | 24 H | 8.026336 | 7.382962 | 4.353803 | 3.346222 | 2.231022 |
|                                                                                     | 25 C | 6.963190 | 6.155882 | 3.341122 | 2.296296 | 2.299369 |
|                                                                                     | 26 H | 7.094529 | 6.570160 | 4.352816 | 3.340286 | 3.340680 |
|                                                                                     | 27 C | 6.657424 | 5.461741 | 2.236065 | 1.423091 | 2.312605 |
|                                                                                     |      | 21       | 22       | 23       | 24       | 25       |
|                                                                                     | 21 H | 0.000000 |          |          |          |          |
|                                                                                     | 22 H | 4.363132 | 0.000000 |          |          |          |
|                                                                                     | 23 C | 3.353920 | 2.231870 | 0.000000 |          |          |
|                                                                                     | 24 H | 4.361150 | 2.693599 | 1.079175 | 0.000000 |          |
|                                                                                     | 25 C | 2.238778 | 3.343952 | 1.425846 | 2.234742 | 0.000000 |
|                                                                                     | 26 H | 2.696762 | 4.351914 | 2.234521 | 2.685446 | 1.079351 |
|                                                                                     | 27 C | 1.078314 | 3.353402 | 2.311881 | 3.352989 | 1.425718 |
|                                                                                     |      | 26       | 27       |          |          |          |
|                                                                                     | 26 H | 0.000000 |          |          |          |          |
|                                                                                     | 27 C | 2.237232 | 0.000000 |          |          |          |
|                                                                                     |      | 1        | 2        | 3        | 4        | 5        |
|                                                                                     | 1 Ru | 0.000000 |          |          |          |          |
|                                                                                     | 2 Ru | 2.314101 | 0.000000 |          |          |          |
|                                                                                     | 3 H  | 2.921529 | 4.140885 | 0.000000 |          |          |
|                                                                                     | 4 C  | 2.206252 | 3.948569 | 1.078847 | 0.000000 |          |
|                                                                                     | 5 C  | 2.209434 | 4.002371 | 2.233456 | 1.421185 | 0.000000 |
|                                                                                     | 6 H  | 2.970037 | 4.783844 | 2.699919 | 2.239414 | 3.343969 |
|                                                                                     | 7 H  | 2.922075 | 4.232916 | 2.695827 | 2.236482 | 1.078777 |
|                                                                                     | 8 C  | 2.275076 | 4.426217 | 3.345755 | 2.302137 | 1.428285 |
|                                                                                     | 9 H  | 3.003639 | 4.949220 | 4.353459 | 3.343331 | 2.235842 |
| 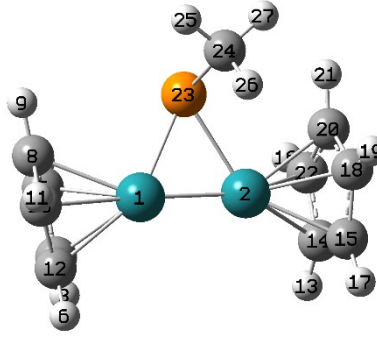 |      |          |          |          |          |          |

|                          |      |          |          |          |          |          |
|--------------------------|------|----------|----------|----------|----------|----------|
| 5T. -957.469678 26.58 C1 | 10 C | 2.305457 | 4.613492 | 3.346590 | 2.304007 | 2.301734 |
| WBI 1.14                 | 11 H | 3.033826 | 5.248131 | 4.356353 | 3.347052 | 3.345329 |
| Charge and spin density  | 12 C | 2.250642 | 4.326955 | 2.239697 | 1.426328 | 2.299873 |
| 1 2                      | 13 H | 4.740401 | 2.910094 | 4.969130 | 5.401666 | 5.864128 |
| 1 Ru 0.192685 1.214154   | 14 C | 4.328253 | 2.186364 | 5.186121 | 5.409892 | 5.691979 |
| 2 Ru 0.348337 0.529530   | 15 C | 4.291038 | 2.188690 | 5.708952 | 5.753395 | 6.083404 |
| 4 C -0.065214 0.005078   | 16 H | 4.794957 | 2.938891 | 5.582273 | 5.740854 | 5.531355 |
| 5 C -0.001032 0.003663   | 17 H | 4.671869 | 2.910495 | 5.952750 | 6.032519 | 6.562419 |
| 8 C -0.015895 0.021384   | 18 C | 4.270132 | 2.183935 | 6.265857 | 6.096100 | 6.127234 |
| 10 C 0.011026 0.110714   | 19 H | 4.668091 | 2.926315 | 6.956557 | 6.667349 | 6.667922 |
| 12 C -0.068956 0.000232  | 20 C | 4.321403 | 2.198644 | 6.156590 | 6.008453 | 5.791492 |
| 14 C -0.060697 -0.007917 | 21 H | 4.742759 | 2.937418 | 6.760238 | 6.503674 | 6.061021 |
| 15 C -0.039321 0.011140  | 22 C | 4.350401 | 2.198553 | 5.495512 | 5.580804 | 5.501646 |
| 18 C -0.028805 -0.020178 | 23 P | 2.283231 | 2.339301 | 4.715930 | 4.089497 | 3.364849 |
| 20 C -0.007878 0.034607  | 24 C | 3.444904 | 3.398020 | 6.266212 | 5.526263 | 4.881825 |
| 22 C -0.002824 0.039869  | 25 H | 3.860135 | 4.319306 | 6.631804 | 5.773523 | 4.977098 |
| 23 P -0.266767 0.044273  | 26 H | 3.450116 | 3.359915 | 6.356076 | 5.632115 | 5.237649 |
| 24 C 0.005340 0.013451   | 27 H | 4.354308 | 3.820950 | 7.076326 | 6.414410 | 5.723465 |
|                          | 6    | 7        | 8        | 9        | 10       |          |
|                          | 6 H  | 0.000000 |          |          |          |          |
|                          | 7 H  | 4.356867 | 0.000000 |          |          |          |
|                          | 8 C  | 3.334068 | 2.237816 | 0.000000 |          |          |
|                          | 9 H  | 4.343764 | 2.688304 | 1.078846 | 0.000000 |          |
|                          | 10 C | 2.228687 | 3.342334 | 1.413018 | 2.227018 | 0.000000 |
|                          | 11 H | 2.682235 | 4.351947 | 2.225821 | 2.683855 | 1.079620 |
|                          | 12 C | 1.079667 | 3.344785 | 2.292149 | 3.335660 | 1.418617 |
|                          | 13 H | 6.258767 | 5.877122 | 6.750748 | 7.444606 | 6.867073 |
|                          | 14 C | 6.251962 | 5.726410 | 6.412967 | 7.002163 | 6.577478 |
|                          | 15 C | 6.150613 | 6.319869 | 6.524929 | 7.085933 | 6.480889 |
|                          | 16 H | 7.216247 | 5.162357 | 6.367097 | 6.721709 | 6.991087 |
|                          | 17 H | 6.061378 | 6.930323 | 6.946854 | 7.589263 | 6.686586 |
|                          | 18 C | 6.595549 | 6.317658 | 6.359614 | 6.719126 | 6.460196 |
|                          | 19 H | 6.922112 | 6.951637 | 6.683710 | 6.962511 | 6.684220 |
|                          | 20 C | 6.970911 | 5.743539 | 6.166498 | 6.419342 | 6.573050 |
|                          | 21 H | 7.574058 | 5.923556 | 6.317080 | 6.389249 | 6.874299 |
|                          | 22 C | 6.766959 | 5.337913 | 6.191514 | 6.593973 | 6.636593 |
|                          | 23 P | 5.230449 | 3.457919 | 3.306442 | 3.331414 | 4.000381 |
|                          | 24 C | 6.115868 | 5.146132 | 4.361203 | 4.154679 | 4.760844 |
|                          | 25 H | 6.322186 | 5.261475 | 4.200223 | 3.757690 | 4.660808 |
|                          | 26 H | 5.838545 | 5.674347 | 4.666479 | 4.623708 | 4.743338 |
|                          | 27 H | 7.127548 | 5.839330 | 5.323990 | 5.058835 | 5.820945 |
|                          | 11   | 12       | 13       | 14       | 15       |          |
|                          | 11 H | 0.000000 |          |          |          |          |
|                          | 12 C | 2.230260 | 0.000000 |          |          |          |
|                          | 13 H | 7.631759 | 6.078783 | 0.000000 |          |          |
|                          | 14 C | 7.271748 | 5.986698 | 1.079670 | 0.000000 |          |

|                                                                                     |                                                   |
|-------------------------------------------------------------------------------------|---------------------------------------------------|
|                                                                                     | 15 C 6.991427 6.001418 2.234547 1.421903 0.000000 |
|                                                                                     | 16 H 7.798523 6.642777 2.693923 2.239764 3.350815 |
|                                                                                     | 17 H 7.114122 6.101919 2.692346 2.234841 1.079599 |
|                                                                                     | 18 C 6.879679 6.289530 3.347699 2.304463 1.424059 |
|                                                                                     | 19 H 6.942447 6.660953 4.357785 3.347637 2.237760 |
|                                                                                     | 20 C 7.127109 6.472594 3.339517 2.296510 2.299231 |
|                                                                                     | 21 H 7.383960 6.971978 4.348466 3.339130 3.341981 |
|                                                                                     | 22 C 7.355920 6.285966 2.234995 1.425993 2.308160 |
|                                                                                     | 23 P 4.537417 4.416185 5.060682 4.305114 4.318754 |
|                                                                                     | 24 C 4.898119 5.445701 6.196261 5.270639 4.812997 |
|                                                                                     | 25 H 4.658406 5.594369 7.175019 6.290271 5.869291 |
|                                                                                     | 26 H 4.747971 5.338166 6.115261 5.191015 4.469285 |
|                                                                                     | 27 H 5.989846 6.453686 6.376412 5.375290 4.936891 |
|                                                                                     | 16 17 18 19 20                                    |
|                                                                                     | 16 H 0.000000                                     |
|                                                                                     | 17 H 4.360862 0.000000                            |
|                                                                                     | 18 C 3.355222 2.233929 0.000000                   |
|                                                                                     | 19 H 4.364120 2.692754 1.078854 0.000000          |
|                                                                                     | 20 C 2.235979 3.342779 1.426566 2.240197 0.000000 |
|                                                                                     | 21 H 2.688562 4.352256 2.235990 2.695396 1.078903 |
|                                                                                     | 22 C 1.078548 3.351367 2.312740 3.354957 1.422113 |
|                                                                                     | 23 P 3.945846 5.079669 3.637103 3.970238 3.152412 |
|                                                                                     | 24 C 5.194045 5.443029 3.751966 3.557408 3.644782 |
|                                                                                     | 25 H 6.096100 6.461462 4.843547 4.609614 4.696708 |
|                                                                                     | 26 H 5.562866 4.916029 3.470985 3.064929 3.786169 |
|                                                                                     | 27 H 5.073455 5.663594 3.680205 3.427165 3.396077 |
|                                                                                     | 21 22 23 24 25                                    |
|                                                                                     | 21 H 0.000000                                     |
|                                                                                     | 22 C 2.230368 0.000000                            |
|                                                                                     | 23 P 3.071481 3.627957 0.000000                   |
|                                                                                     | 24 C 3.322194 4.658154 1.862826 0.000000          |
|                                                                                     | 25 H 4.295108 5.651028 2.434300 1.094914 0.000000 |
|                                                                                     | 26 H 3.687806 4.847689 2.515265 1.089824 1.779624 |
|                                                                                     | 27 H 2.801498 4.580134 2.449168 1.095432 1.758058 |
|                                                                                     | 26 27                                             |
|                                                                                     | 26 H 0.000000                                     |
|                                                                                     | 27 H 1.784634 0.000000                            |
| 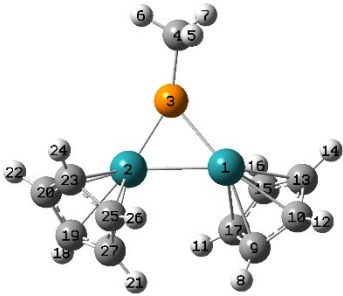 | 1 2 3 4 5                                         |
|                                                                                     | 1 Ru 0.000000                                     |
|                                                                                     | 2 Ru 2.571540 0.000000                            |
|                                                                                     | 3 P 2.277816 2.149217 0.000000                    |
|                                                                                     | 4 C 3.715756 3.771834 1.834564 0.000000           |
|                                                                                     | 5 H 3.859553 4.106582 2.430874 1.092273 0.000000  |
|                                                                                     | 6 H 4.579454 4.066037 2.434253 1.091374 1.780361  |
|                                                                                     | 7 H 4.048555 4.556042 2.435974 1.091763 1.774679  |
|                                                                                     | 8 H 3.000840 4.159979 5.074722 6.665752 6.717570  |

|                            |      |          |          |          |          |          |
|----------------------------|------|----------|----------|----------|----------|----------|
| 6Q -957.46389 30.21 C1     | 9 C  | 2.306608 | 3.960011 | 4.459097 | 6.012472 | 6.144197 |
| WBI 0.69                   | 10 C | 2.283150 | 4.615579 | 4.504168 | 5.738346 | 5.749366 |
|                            | 11 H | 3.120820 | 3.665025 | 4.399607 | 6.164409 | 6.647897 |
| Charges and spin densities | 12 H | 2.975447 | 5.297938 | 5.158861 | 6.200290 | 6.029149 |
| 1 2                        | 13 C | 2.354286 | 4.764699 | 4.142724 | 5.251904 | 5.452748 |
| 1 Ru                       | 14 H | 3.061376 | 5.526225 | 4.528159 | 5.297173 | 5.456388 |
| 0.321215                   | 15 C | 2.457752 | 4.278044 | 3.899745 | 5.289443 | 5.731118 |
| 2.668203                   | 16 H | 3.163910 | 4.653447 | 4.027127 | 5.295443 | 5.904287 |
| 2 Ru                       | 17 C | 2.407723 | 3.713361 | 4.082557 | 5.741780 | 6.123125 |
| 0.344053                   | 18 H | 4.975972 | 3.053740 | 4.991523 | 6.648034 | 7.112775 |
| 0.990427                   | 19 C | 4.451668 | 2.312936 | 4.405395 | 5.990557 | 6.337138 |
| 3 P                        | 20 C | 4.794181 | 2.262182 | 4.114662 | 5.394187 | 5.719905 |
| -0.240653                  | 21 H | 3.901078 | 3.013161 | 4.931655 | 6.599488 | 6.713554 |
| 0.036427                   | 22 H | 5.557065 | 2.994717 | 4.518141 | 5.621879 | 6.062728 |
| 4 C                        | 23 C | 4.431292 | 2.166272 | 3.841750 | 4.909995 | 4.973738 |
| 0.018188                   | 24 H | 4.993052 | 2.895556 | 4.093245 | 4.765188 | 4.704739 |
| 0.014382                   | 25 C | 3.779556 | 2.152038 | 3.984312 | 5.277909 | 5.225311 |
| 9 C                        | 26 H | 3.857999 | 2.877124 | 4.343899 | 5.456568 | 5.193805 |
| -0.092940                  | 27 C | 3.838354 | 2.278888 | 4.363492 | 5.957083 | 6.098974 |
| 0.053729                   |      |          |          |          |          |          |
| 10 C                       |      |          |          |          |          |          |
| -0.078294                  |      |          |          |          |          |          |
| 0.040478                   |      |          |          |          |          |          |
| 13 C                       |      |          |          |          |          |          |
| -0.062925                  |      |          |          |          |          |          |
| 0.029342                   |      |          |          |          |          |          |
| 15 C                       |      |          |          |          |          |          |
| 0.002237                   |      |          |          |          |          |          |
| 0.123638                   |      |          |          |          |          |          |
| 17 C                       |      |          |          |          |          |          |
| -0.009326                  |      |          |          |          |          |          |
| 0.032390                   |      |          |          |          |          |          |
| 19 C                       |      |          |          |          |          |          |
| -0.011952                  |      |          |          |          |          |          |
| 0.022488                   |      |          |          |          |          |          |
| 20 C                       |      |          |          |          |          |          |
| -0.019784                  |      |          |          |          |          |          |
| 0.023439                   |      |          |          |          |          |          |
| 23 C                       |      |          |          |          |          |          |
| -0.096234                  |      |          |          |          |          |          |
| -0.035470                  |      |          |          |          |          |          |
| 25 C                       |      |          |          |          |          |          |
| -0.045809                  |      |          |          |          |          |          |
| -0.007675                  |      |          |          |          |          |          |
| 27 C                       |      |          |          |          |          |          |
| -0.027776                  |      |          |          |          |          |          |
| 0.008202                   |      |          |          |          |          |          |
|                            | 6    | 7        | 8        | 9        | 10       |          |
|                            | 6 H  | 0.000000 |          |          |          |          |
|                            | 7 H  | 1.778489 | 0.000000 |          |          |          |
|                            | 8 H  | 7.445543 | 7.048030 | 0.000000 |          |          |
|                            | 9 C  | 6.848059 | 6.267218 | 1.079822 | 0.000000 |          |
|                            | 10 C | 6.708598 | 5.829272 | 2.235110 | 1.421207 | 0.000000 |
|                            | 11 H | 6.770641 | 6.396981 | 2.687347 | 2.232288 | 3.341279 |
|                            | 12 H | 7.210642 | 6.303231 | 2.697416 | 2.236851 | 1.079873 |
|                            | 13 C | 6.229090 | 5.111690 | 3.339851 | 2.294711 | 1.423737 |
|                            | 14 H | 6.320275 | 4.962701 | 4.351199 | 3.338713 | 2.234926 |
|                            | 15 C | 6.118010 | 5.198679 | 3.334529 | 2.292800 | 2.298422 |
|                            | 16 H | 6.037120 | 5.061888 | 4.343505 | 3.335560 | 3.341124 |
|                            | 17 C | 6.486816 | 5.903408 | 2.233142 | 1.421603 | 2.298791 |
|                            | 18 H | 6.731997 | 7.352745 | 4.888633 | 5.086472 | 6.305294 |
|                            | 19 C | 6.088079 | 6.790205 | 4.628269 | 4.848744 | 5.958561 |
|                            | 20 C | 5.281440 | 6.303721 | 5.638680 | 5.746786 | 6.654146 |
|                            | 21 H | 7.023117 | 7.319371 | 2.837670 | 3.449384 | 4.652756 |
|                            | 22 H | 5.313247 | 6.504636 | 6.597749 | 6.628035 | 7.514034 |
|                            | 23 C | 4.887921 | 5.917545 | 5.455545 | 5.601346 | 6.315158 |
|                            | 24 H | 4.603030 | 5.835781 | 6.313736 | 6.412282 | 6.967811 |
|                            | 25 C | 5.538744 | 6.204129 | 4.232518 | 4.541181 | 5.307599 |
|                            | 26 H | 5.828019 | 6.372790 | 4.194489 | 4.573106 | 5.152527 |
|                            | 27 C | 6.254616 | 6.765314 | 3.609732 | 4.011299 | 5.088440 |
|                            |      | 11       | 12       | 13       | 14       | 15       |
|                            | 11 H | 0.000000 |          |          |          |          |
|                            | 12 H | 4.352993 | 0.000000 |          |          |          |
|                            | 13 C | 3.330166 | 2.237225 | 0.000000 |          |          |

|  |    |   |          |          |          |          |          |  |  |
|--|----|---|----------|----------|----------|----------|----------|--|--|
|  | 14 | H | 4.338987 | 2.692949 | 1.079915 | 0.000000 |          |  |  |
|  | 15 | C | 2.222009 | 3.340721 | 1.414602 | 2.227126 | 0.000000 |  |  |
|  | 16 | H | 2.675426 | 4.350209 | 2.225813 | 2.681147 | 1.079601 |  |  |
|  | 17 | C | 1.078984 | 3.343332 | 2.287612 | 3.330444 | 1.409577 |  |  |
|  | 18 | H | 3.845025 | 7.093574 | 6.588604 | 7.557909 | 5.666452 |  |  |
|  | 19 | C | 4.039276 | 6.653744 | 6.335460 | 7.272642 | 5.599990 |  |  |
|  | 20 | C | 5.075652 | 7.298792 | 6.926718 | 7.749542 | 6.283766 |  |  |
|  | 21 | H | 3.488195 | 5.159006 | 5.458273 | 6.476109 | 5.025516 |  |  |
|  | 22 | H | 5.720007 | 8.212466 | 7.642713 | 8.419546 | 6.901865 |  |  |
|  | 23 | C | 5.487833 | 6.785666 | 6.730607 | 7.486360 | 6.372715 |  |  |
|  | 24 | H | 6.429340 | 7.357689 | 7.342990 | 7.999010 | 7.095587 |  |  |
|  | 25 | C | 4.811302 | 5.688007 | 5.965396 | 6.795797 | 5.741492 |  |  |
|  | 26 | H | 5.315285 | 5.329800 | 5.972918 | 6.742883 | 5.999431 |  |  |
|  | 27 | C | 3.856885 | 5.631626 | 5.733518 | 6.692382 | 5.259352 |  |  |
|  |    |   | 16       | 17       | 18       | 19       | 20       |  |  |
|  | 16 | H | 0.000000 |          |          |          |          |  |  |
|  | 17 | C | 2.221188 | 0.000000 |          |          |          |  |  |
|  | 18 | H | 5.940836 | 4.600790 | 0.000000 |          |          |  |  |
|  | 19 | C | 5.979350 | 4.577472 | 1.080140 | 0.000000 |          |  |  |
|  | 20 | C | 6.576589 | 5.480575 | 2.226809 | 1.418995 | 0.000000 |  |  |
|  | 21 | H | 5.749062 | 3.762794 | 2.676508 | 2.223071 | 3.341271 |  |  |
|  | 22 | H | 7.047748 | 6.199925 | 2.673969 | 2.227534 | 1.079555 |  |  |
|  | 23 | C | 6.810853 | 5.637681 | 3.340338 | 2.299041 | 1.420362 |  |  |
|  | 24 | H | 7.503006 | 6.493164 | 4.351430 | 3.343171 | 2.237982 |  |  |
|  | 25 | C | 6.372890 | 4.854352 | 3.335384 | 2.291585 | 2.303084 |  |  |
|  | 26 | H | 6.742864 | 5.169707 | 4.344786 | 3.333944 | 3.345238 |  |  |
|  | 27 | C | 5.871231 | 4.146397 | 2.221330 | 1.409739 | 2.299407 |  |  |
|  |    |   | 21       | 22       | 23       | 24       | 25       |  |  |
|  | 21 | H | 0.000000 |          |          |          |          |  |  |
|  | 22 | H | 4.345541 | 0.000000 |          |          |          |  |  |
|  | 23 | C | 3.358114 | 2.235440 | 0.000000 |          |          |  |  |
|  | 24 | H | 4.366040 | 2.703076 | 1.078718 | 0.000000 |          |  |  |
|  | 25 | C | 2.237569 | 3.349668 | 1.437653 | 2.247443 | 0.000000 |  |  |
|  | 26 | H | 2.696986 | 4.360122 | 2.247191 | 2.703355 | 1.079012 |  |  |
|  | 27 | C | 1.078623 | 3.339011 | 2.314550 | 3.355370 | 1.425943 |  |  |
|  |    |   | 26       | 27       |          |          |          |  |  |
|  | 26 | H | 0.000000 |          |          |          |          |  |  |
|  | 27 | C | 2.238274 | 0.000000 |          |          |          |  |  |

Table S3. Distance matrix for the lowest energy MePCp<sub>2</sub>Ru<sub>2</sub>(CO) structures as optimized at the PBE0/def2TZVP level. Included are the ranking order, spin multiplicity (S, T or Q), total energy (in a.u.), relative energy (in kcal/mol), symmetry point group Wiberg bond indices for the Fe-Fe bonds, Mulliken charges and the spin density (Cp moieties are omitted for clarity).

|                                                                                   | 1        | 2        | 3        | 4        | 5        |
|-----------------------------------------------------------------------------------|----------|----------|----------|----------|----------|
| 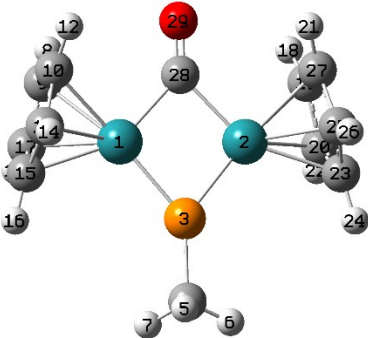 |          |          |          |          |          |
| 1S -1070.854173 0.00 C2v                                                          |          |          |          |          |          |
| WBI 0.49                                                                          |          |          |          |          |          |
| Charge and spin densities                                                         |          |          |          |          |          |
| 1                                                                                 |          |          |          |          |          |
| 1 Ru 0.408759                                                                     |          |          |          |          |          |
| 2 Ru 0.408834                                                                     |          |          |          |          |          |
| 3 P -0.334380                                                                     |          |          |          |          |          |
| 4 C 0.045373                                                                      |          |          |          |          |          |
| 9 C 0.004487                                                                      |          |          |          |          |          |
| 10 C 0.004920                                                                     |          |          |          |          |          |
| 13 C -0.018783                                                                    |          |          |          |          |          |
| 15 C -0.063912                                                                    |          |          |          |          |          |
| 17 C -0.016459                                                                    |          |          |          |          |          |
| 19 C 0.004122                                                                     |          |          |          |          |          |
| 20 C -0.015121                                                                    |          |          |          |          |          |
| 23 C -0.066355                                                                    |          |          |          |          |          |
| 25 C -0.017154                                                                    |          |          |          |          |          |
| 27 C 0.004547                                                                     |          |          |          |          |          |
| 28 C -0.105497                                                                    |          |          |          |          |          |
| 29 O -0.243379                                                                    |          |          |          |          |          |
|                                                                                   | 1        | 2        | 3        | 4        | 5        |
| 1 Ru                                                                              | 0.000000 |          |          |          |          |
| 2 Ru                                                                              | 2.731067 | 0.000000 |          |          |          |
| 3 P                                                                               | 2.167998 | 2.166816 | 0.000000 |          |          |
| 4 C                                                                               | 3.762059 | 3.766351 | 1.824690 | 0.000000 |          |
| 5 H                                                                               | 4.141862 | 4.297780 | 2.411691 | 1.092645 | 0.000000 |
| 6 H                                                                               | 4.552864 | 3.928389 | 2.433599 | 1.090554 | 1.777813 |
| 7 H                                                                               | 3.985416 | 4.482501 | 2.425271 | 1.091373 | 1.772968 |
| 8 H                                                                               | 2.922526 | 4.786964 | 4.931943 | 6.486104 | 6.982277 |
| 9 C                                                                               | 2.199103 | 4.534658 | 4.299014 | 5.757653 | 6.152896 |
| 10 C                                                                              | 2.198802 | 4.532157 | 4.299545 | 5.755349 | 5.913729 |
| 11 H                                                                              | 2.908878 | 5.139699 | 4.207142 | 5.140860 | 5.724739 |
| 12 H                                                                              | 2.921540 | 4.781636 | 4.932213 | 6.481752 | 6.579432 |
| 13 C                                                                              | 2.170680 | 4.710135 | 3.850211 | 4.964551 | 4.953158 |
| 14 H                                                                              | 2.908421 | 5.133036 | 4.209056 | 5.133204 | 4.889258 |
| 15 C                                                                              | 2.182993 | 4.851504 | 3.578293 | 4.439757 | 4.609777 |
| 16 H                                                                              | 2.916567 | 5.364475 | 3.712524 | 4.108335 | 4.190610 |
| 17 C                                                                              | 2.171357 | 4.714388 | 3.849495 | 4.969065 | 5.405784 |
| 18 H                                                                              | 4.786108 | 2.922759 | 4.931147 | 6.491509 | 7.162059 |
| 19 C                                                                              | 4.534166 | 2.199354 | 4.298176 | 5.764373 | 6.375124 |
| 20 C                                                                              | 4.714574 | 2.171659 | 3.849043 | 4.978318 | 5.685940 |
| 21 H                                                                              | 4.780767 | 2.921631 | 4.931045 | 6.486592 | 6.768751 |
| 22 H                                                                              | 5.139918 | 2.909063 | 4.206794 | 5.150150 | 5.996695 |
| 23 C                                                                              | 4.851782 | 2.182926 | 3.577530 | 4.450504 | 4.957671 |
| 24 H                                                                              | 5.365068 | 2.916415 | 3.711946 | 4.121091 | 4.599851 |
| 25 C                                                                              | 4.710524 | 2.171015 | 3.849574 | 4.973378 | 5.256420 |
| 26 H                                                                              | 5.133263 | 2.908414 | 4.208081 | 5.141456 | 5.202845 |
| 27 C                                                                              | 4.531796 | 2.199072 | 4.298606 | 5.761844 | 6.144065 |
| 28 C                                                                              | 2.004138 | 2.004211 | 3.150124 | 4.974755 | 5.422359 |
| 29 O                                                                              | 2.976942 | 2.977047 | 4.328482 | 6.153107 | 6.582216 |
|                                                                                   | 6        | 7        | 8        | 9        | 10       |
| 6 H                                                                               | 0.000000 |          |          |          |          |
| 7 H                                                                               | 1.783614 | 0.000000 |          |          |          |
| 8 H                                                                               | 7.218253 | 6.460297 | 0.000000 |          |          |
| 9 C                                                                               | 6.586609 | 5.716099 | 1.078958 | 0.000000 |          |
| 10 C                                                                              | 6.646671 | 5.881288 | 2.228528 | 1.417916 | 0.000000 |
| 11 H                                                                              | 5.943289 | 4.700830 | 2.692139 | 2.235627 | 3.343256 |
| 12 H                                                                              | 7.321073 | 6.734478 | 2.681302 | 2.228382 | 1.078960 |
| 13 C                                                                              | 5.963677 | 5.023763 | 3.343856 | 2.301799 | 1.425625 |
| 14 H                                                                              | 6.145632 | 5.290517 | 4.351473 | 3.343465 | 2.235706 |
| 15 C                                                                              | 5.458300 | 4.214876 | 3.347672 | 2.304866 | 2.304807 |

|  |    |   |          |          |          |          |          |
|--|----|---|----------|----------|----------|----------|----------|
|  | 16 | H | 5.165485 | 3.705733 | 4.357825 | 3.348054 | 3.347930 |
|  | 17 | C | 5.854670 | 4.704014 | 2.237374 | 1.425645 | 2.301580 |
|  | 18 | H | 6.473747 | 7.060767 | 5.261347 | 5.608459 | 5.934159 |
|  | 19 | C | 5.677014 | 6.446584 | 5.608792 | 5.757563 | 5.925740 |
|  | 20 | C | 4.675534 | 5.659269 | 6.224378 | 6.241010 | 6.493500 |
|  | 21 | H | 6.590013 | 7.310198 | 5.898190 | 5.929929 | 5.596411 |
|  | 22 | H | 4.753125 | 5.678912 | 6.468429 | 6.546203 | 6.998677 |
|  | 23 | C | 4.059298 | 5.326783 | 6.883060 | 6.700123 | 6.696192 |
|  | 24 | H | 3.507642 | 5.019145 | 7.619294 | 7.345439 | 7.341614 |
|  | 25 | C | 4.813519 | 5.925598 | 6.697249 | 6.491751 | 6.231160 |
|  | 26 | H | 5.007287 | 6.171982 | 7.308114 | 6.992823 | 6.532140 |
|  | 27 | C | 5.747630 | 6.592401 | 5.934950 | 5.926065 | 5.749947 |
|  | 28 | C | 5.459526 | 5.447130 | 3.060985 | 2.965632 | 2.961485 |
|  | 29 | O | 6.621213 | 6.608388 | 2.979495 | 3.205250 | 3.199776 |
|  |    |   | 11       | 12       | 13       | 14       | 15       |
|  | 11 | H | 0.000000 |          |          |          |          |
|  | 12 | H | 4.351199 | 0.000000 |          |          |          |
|  | 13 | C | 3.346889 | 2.237317 | 0.000000 |          |          |
|  | 14 | H | 4.358406 | 2.692255 | 1.079105 | 0.000000 |          |
|  | 15 | C | 2.237924 | 3.347640 | 1.424412 | 2.238146 | 0.000000 |
|  | 16 | H | 2.696601 | 4.357715 | 2.236350 | 2.696556 | 1.078976 |
|  | 17 | C | 1.079133 | 3.343602 | 2.302915 | 3.346849 | 1.424171 |
|  | 18 | H | 6.468167 | 5.897538 | 6.696167 | 7.307062 | 6.882507 |
|  | 19 | C | 6.545993 | 5.929891 | 6.490990 | 6.992154 | 6.699757 |
|  | 20 | C | 6.581701 | 6.694160 | 6.806443 | 7.294054 | 6.789913 |
|  | 21 | H | 7.308472 | 5.244920 | 6.209464 | 6.449610 | 6.874153 |
|  | 22 | H | 6.574545 | 7.308796 | 7.298475 | 7.878094 | 7.085367 |
|  | 23 | C | 7.085167 | 6.874958 | 6.783107 | 7.073837 | 6.873918 |
|  | 24 | H | 7.488494 | 7.611494 | 7.245932 | 7.477080 | 7.224694 |
|  | 25 | C | 7.298612 | 6.210652 | 6.398462 | 6.563513 | 6.783242 |
|  | 26 | H | 7.877955 | 6.450939 | 6.563362 | 6.550676 | 7.073675 |
|  | 27 | C | 6.998588 | 5.596830 | 6.230477 | 6.531456 | 6.695830 |
|  | 28 | C | 4.283107 | 3.052494 | 3.658886 | 4.274359 | 4.057328 |
|  | 29 | O | 4.867047 | 2.967469 | 4.237082 | 4.855982 | 4.788817 |
|  |    |   | 16       | 17       | 18       | 19       | 20       |
|  | 16 | H | 0.000000 |          |          |          |          |
|  | 17 | C | 2.236326 | 0.000000 |          |          |          |
|  | 18 | H | 7.618723 | 6.223932 | 0.000000 |          |          |
|  | 19 | C | 7.344962 | 6.240708 | 1.078951 | 0.000000 |          |
|  | 20 | C | 7.252639 | 6.411739 | 2.237320 | 1.425552 | 0.000000 |
|  | 21 | H | 7.610404 | 6.693702 | 2.681330 | 2.228468 | 3.343597 |
|  | 22 | H | 7.488697 | 6.581700 | 2.692250 | 2.235634 | 1.079120 |
|  | 23 | C | 7.224485 | 6.789783 | 3.347591 | 2.304768 | 1.424179 |
|  | 24 | H | 7.423786 | 7.252587 | 4.357719 | 3.347933 | 2.236270 |
|  | 25 | C | 7.245744 | 6.806620 | 3.343854 | 2.301829 | 2.302995 |
|  | 26 | H | 7.476477 | 7.293993 | 4.351504 | 3.343527 | 3.346897 |



|                                                                                                                                                                                                                                                                                                                                                                                                                                                                                                                                                                                                                               |                                                                                                                                                                                                                                                                                                                                                                                                                                                                                                                                                                                                                                                                                                                                                                                                                                                                                                                                                                                                                                                                                                                                                                                                                                                                                                                                                                                                                                                                                                                                                                                                                                                                                                                                    |
|-------------------------------------------------------------------------------------------------------------------------------------------------------------------------------------------------------------------------------------------------------------------------------------------------------------------------------------------------------------------------------------------------------------------------------------------------------------------------------------------------------------------------------------------------------------------------------------------------------------------------------|------------------------------------------------------------------------------------------------------------------------------------------------------------------------------------------------------------------------------------------------------------------------------------------------------------------------------------------------------------------------------------------------------------------------------------------------------------------------------------------------------------------------------------------------------------------------------------------------------------------------------------------------------------------------------------------------------------------------------------------------------------------------------------------------------------------------------------------------------------------------------------------------------------------------------------------------------------------------------------------------------------------------------------------------------------------------------------------------------------------------------------------------------------------------------------------------------------------------------------------------------------------------------------------------------------------------------------------------------------------------------------------------------------------------------------------------------------------------------------------------------------------------------------------------------------------------------------------------------------------------------------------------------------------------------------------------------------------------------------|
|                                                                                                                                                                                                                                                                                                                                                                                                                                                                                                                                                                                                                               | 27 C 7.340994 6.493335 2.228588 1.418027 2.301601<br>28 C 4.900412 3.664629 3.059743 2.964678 3.664095<br>29 O 5.739686 4.244057 2.977689 3.203901 4.243109<br>21 22 23 24 25<br>21 H 0.000000<br>22 H 4.351252 0.000000<br>23 C 3.347541 2.237843 0.000000<br>24 H 4.357648 2.696373 1.078984 0.000000<br>25 C 2.237235 3.346917 1.424417 2.236392 0.000000<br>26 H 2.692269 4.358372 2.238108 2.696551 1.079098<br>27 C 1.078955 3.343318 2.304706 3.347850 1.425540<br>28 C 3.051631 4.282595 4.056897 4.900160 3.658789<br>29 O 2.966429 4.866123 4.788085 5.739130 4.236716<br>26 27 28 29<br>26 H 0.000000<br>27 C 2.235691 0.000000<br>28 C 4.274275 2.960860 0.000000<br>29 O 4.855779 3.198897 1.178358 0.000000                                                                                                                                                                                                                                                                                                                                                                                                                                                                                                                                                                                                                                                                                                                                                                                                                                                                                                                                                                                                          |
| 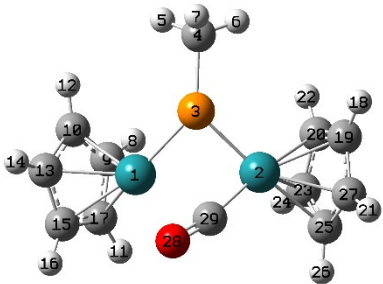 <p>2S -1070.815996 23.96 C1<br/>WBI 0.35</p> <p>Charges and spin densities</p> <p>1</p> <p>1 Ru 0.481279<br/>           2 Ru 0.521327<br/>           3 P -0.270334<br/>           4 C 0.007079<br/>           9 C -0.040288<br/>           10 C -0.065049<br/>           13 C -0.054437<br/>           15 C 0.010334<br/>           17 C -0.049292<br/>           19 C -0.027170<br/>           20 C -0.035053<br/>           23 C -0.058204<br/>           25 C -0.026045<br/>           27 C -0.049314<br/>           28 O -0.168144</p> | <p>1 2 3 4 5</p> <p>1 Ru 0.000000<br/>           2 Ru 2.974834 0.000000<br/>           3 P 2.209511 2.200629 0.000000<br/>           4 C 3.706434 3.630982 1.832406 0.000000<br/>           5 H 3.756723 4.326647 2.434802 1.091792 0.000000<br/>           6 H 4.400916 3.653753 2.445825 1.090882 1.787625<br/>           7 H 4.336198 4.282340 2.418416 1.093116 1.769078<br/>           8 H 2.837655 4.182606 3.778545 4.389866 3.984796<br/>           9 C 2.099352 4.180566 3.571701 4.438423 4.052986<br/>           10 C 2.105843 4.711672 3.429377 4.065260 3.521584<br/>           11 H 2.952060 4.505424 4.832749 6.180355 6.051416<br/>           12 H 2.855511 5.150949 3.535671 3.659886 2.892538<br/>           13 C 2.164158 5.133136 3.969508 4.939966 4.557352<br/>           14 H 2.927888 5.852391 4.468762 5.311900 4.914261<br/>           15 C 2.216870 4.941673 4.402841 5.704359 5.475016<br/>           16 H 2.951231 5.473791 5.123968 6.558412 6.413687<br/>           17 C 2.192671 4.366545 4.202727 5.461546 5.243240<br/>           18 H 5.646276 2.938138 3.920779 4.170882 5.120645<br/>           19 C 5.086562 2.213246 3.705434 4.320172 5.177890<br/>           20 C 4.668639 2.222892 3.614716 4.173437 4.790146<br/>           21 H 5.746424 2.939094 4.775879 5.871058 6.803904<br/>           22 H 4.926065 2.961482 3.771632 3.892076 4.360228<br/>           23 C 4.438469 2.213280 4.060732 5.061418 5.576040<br/>           24 H 4.513727 2.951724 4.551987 5.535870 5.866561<br/>           25 C 4.777838 2.229582 4.416266 5.667450 6.341574<br/>           26 H 5.099205 2.954317 5.118948 6.538361 7.173090<br/>           27 C 5.131756 2.199828 4.189821 5.253698 6.109517</p> |

|                |      |          |          |          |          |          |
|----------------|------|----------|----------|----------|----------|----------|
| 29 C -0.176689 | 28 O | 2.352768 | 3.010048 | 3.262415 | 5.066867 | 5.514154 |
|                | 29 C | 2.267673 | 1.843377 | 2.606476 | 4.425540 | 4.983374 |
|                |      | 6        | 7        | 8        | 9        | 10       |
|                | 6 H  | 0.000000 |          |          |          |          |
|                | 7 H  | 1.773759 | 0.000000 |          |          |          |
|                | 8 H  | 4.674391 | 5.387011 | 0.000000 |          |          |
|                | 9 C  | 4.944341 | 5.316857 | 1.079288 | 0.000000 |          |
|                | 10 C | 4.821292 | 4.746212 | 2.243078 | 1.432058 | 0.000000 |
|                | 11 H | 6.594774 | 7.029596 | 2.704762 | 2.247946 | 3.364730 |
|                | 12 H | 4.439834 | 4.279135 | 2.703702 | 2.245376 | 1.079189 |
|                | 13 C | 5.809567 | 5.437921 | 3.355117 | 2.311733 | 1.430238 |
|                | 14 H | 6.284283 | 5.616690 | 4.368028 | 3.356672 | 2.245466 |
|                | 15 C | 6.444828 | 6.309828 | 3.336027 | 2.293612 | 2.302157 |
|                | 16 H | 7.319802 | 7.084694 | 4.346413 | 3.337323 | 3.343775 |
|                | 17 C | 6.001782 | 6.260887 | 2.243967 | 1.434577 | 2.321559 |
|                | 18 H | 3.520790 | 4.539142 | 6.310379 | 6.614809 | 7.028646 |
|                | 19 C | 3.780895 | 4.872779 | 5.656223 | 5.968761 | 6.554280 |
|                | 20 C | 3.609587 | 4.986425 | 4.577171 | 5.072011 | 5.847928 |
|                | 21 H | 5.602214 | 6.215247 | 6.997017 | 7.057362 | 7.627724 |
|                | 22 H | 3.174875 | 4.782654 | 4.350906 | 5.006106 | 5.737224 |
|                | 23 C | 4.719366 | 5.919002 | 4.336472 | 4.755848 | 5.763723 |
|                | 24 H | 5.246929 | 6.487518 | 3.864756 | 4.389146 | 5.580850 |
|                | 25 C | 5.417958 | 6.356885 | 5.364313 | 5.561219 | 6.463319 |
|                | 26 H | 6.387732 | 7.212971 | 5.797200 | 5.892967 | 6.855483 |
|                | 27 C | 4.927891 | 5.758770 | 6.062226 | 6.222063 | 6.888426 |
|                | 28 O | 5.667265 | 5.409237 | 4.937722 | 4.259750 | 4.369253 |
|                | 29 C | 4.848162 | 4.887550 | 4.491637 | 4.045953 | 4.366399 |
|                |      | 11       | 12       | 13       | 14       | 15       |
|                | 11 H | 0.000000 |          |          |          |          |
|                | 12 H | 4.375250 | 0.000000 |          |          |          |
|                | 13 C | 3.357453 | 2.241893 | 0.000000 |          |          |
|                | 14 H | 4.362291 | 2.705795 | 1.078801 | 0.000000 |          |
|                | 15 C | 2.228423 | 3.345728 | 1.425936 | 2.238371 | 0.000000 |
|                | 16 H | 2.679206 | 4.354089 | 2.230147 | 2.684587 | 1.080680 |
|                | 17 C | 1.078782 | 3.364665 | 2.315244 | 3.354731 | 1.412372 |
|                | 18 H | 7.267231 | 7.118602 | 7.707658 | 8.331579 | 7.761588 |
|                | 19 C | 6.388732 | 6.782861 | 7.199094 | 7.912535 | 7.088322 |
|                | 20 C | 5.549026 | 6.089552 | 6.661461 | 7.496308 | 6.507387 |
|                | 21 H | 6.912676 | 8.060126 | 7.895095 | 8.520426 | 7.546937 |
|                | 22 H | 5.818779 | 5.821199 | 6.740477 | 7.579391 | 6.737571 |
|                | 23 C | 4.660037 | 6.239811 | 6.407954 | 7.323613 | 5.955011 |
|                | 24 H | 4.099723 | 6.119864 | 6.266836 | 7.260741 | 5.700676 |
|                | 25 C | 5.145403 | 7.027863 | 6.852246 | 7.682534 | 6.291180 |
|                | 26 H | 5.056352 | 7.543260 | 7.072125 | 7.901785 | 6.317540 |
|                | 27 C | 6.168228 | 7.308585 | 7.292387 | 8.003771 | 6.951638 |
|                | 28 O | 3.989112 | 5.123512 | 3.870742 | 4.286371 | 3.433932 |

|                                                                                                                                                                          |                                                                                                                                                                                                                                                                                                                                                                                                                                                                                                                                                                                                                                                                                                                                                                                                                                                                                                                                                                                                                                                                                                                                                                                                                                                                                                               |
|--------------------------------------------------------------------------------------------------------------------------------------------------------------------------|---------------------------------------------------------------------------------------------------------------------------------------------------------------------------------------------------------------------------------------------------------------------------------------------------------------------------------------------------------------------------------------------------------------------------------------------------------------------------------------------------------------------------------------------------------------------------------------------------------------------------------------------------------------------------------------------------------------------------------------------------------------------------------------------------------------------------------------------------------------------------------------------------------------------------------------------------------------------------------------------------------------------------------------------------------------------------------------------------------------------------------------------------------------------------------------------------------------------------------------------------------------------------------------------------------------|
|                                                                                                                                                                          | 29 C 3.949986 5.036352 4.252098 4.835550 3.879460<br>16 17 18 19 20<br>16 H 0.000000<br>17 C 2.220786 0.000000<br>18 H 8.367547 7.127337 0.000000<br>19 C 7.666051 6.359126 1.079334 0.000000<br>20 C 7.193687 5.571281 2.230594 1.416310 0.000000<br>21 H 7.834531 7.025102 2.686036 2.236045 3.344073<br>22 H 7.539822 5.749612 2.692557 2.231682 1.078950<br>23 C 6.522840 4.923444 3.345653 2.300734 1.430172<br>24 H 6.291929 4.506283 4.354763 3.342709 2.240589<br>25 C 6.663715 5.460232 3.343227 2.301249 2.302283<br>26 H 6.533697 5.528686 4.352930 3.344659 3.345554<br>27 C 7.348178 6.288288 2.232892 1.425510 2.303063<br>28 O 3.430543 3.707961 5.675524 5.089727 5.191921<br>29 C 4.128946 3.747450 4.568972 3.930529 4.027012<br>21 22 23 24 25<br>21 H 0.000000<br>22 H 4.354815 0.000000<br>23 C 3.344730 2.239597 0.000000<br>24 H 4.355154 2.694699 1.078961 0.000000<br>25 C 2.239781 3.343519 1.416480 2.229626 0.000000<br>26 H 2.697827 4.352949 2.227292 2.684047 1.079208<br>27 C 1.078600 3.347131 2.301771 3.345055 1.425154<br>28 O 4.763649 5.859552 4.731181 5.076421 4.343781<br>29 C 3.808093 4.736114 3.630267 4.092065 3.287179<br>26 27 28 29<br>26 H 0.000000<br>27 C 2.236081 0.000000<br>28 O 4.337918 4.550703 0.000000<br>29 C 3.468055 3.457817 1.178307 0.000000 |
| 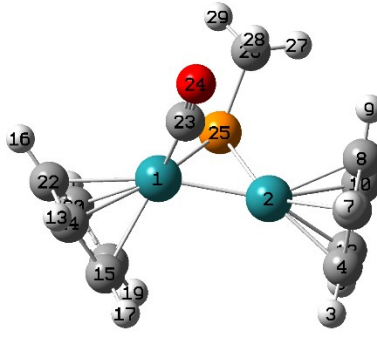 <p>3S -1070.807612 29.22 C1<br/>WBI 1.04</p> <p>Charges and spin densities<br/>1</p> | 1 Ru 0.000000<br>2 Ru 2.350069 0.000000<br>3 H 4.694375 2.875325 0.000000<br>4 C 4.308927 2.153336 1.079666 0.000000<br>5 C 4.319444 2.155721 2.234516 1.419964 0.000000<br>6 H 4.678952 2.882918 2.691003 2.239446 3.347874<br>7 H 4.717370 2.881961 2.697346 2.235632 1.079435<br>8 C 4.302545 2.148776 3.346765 2.302396 1.427117<br>9 H 4.703625 2.883083 4.355840 3.344707 2.237846<br>10 C 4.313294 2.169448 3.342661 2.300909 2.303364<br>11 H 4.706363 2.900812 4.350339 3.342954 3.346295<br>12 C 4.286999 2.147681 2.235133 1.427312 2.305687<br>13 H 2.969166 4.793983 6.140799 6.188923 6.180020<br>14 C 2.264026 4.278851 5.804376 5.795500 5.937716                                                                                                                                                                                                                                                                                                                                                                                                                                                                                                                                                                                                                                             |

|      |           |          |          |          |          |    |  |  |  |
|------|-----------|----------|----------|----------|----------|----|--|--|--|
| 1 Ru | 0.156445  |          |          |          |          |    |  |  |  |
| 2 Ru | 0.362208  |          |          |          |          |    |  |  |  |
| 4 C  | -0.040674 |          |          |          |          |    |  |  |  |
| 5 C  | 0.005397  |          |          |          |          |    |  |  |  |
| 8 C  | 0.002939  |          |          |          |          |    |  |  |  |
| 10 C | 0.015165  |          |          |          |          |    |  |  |  |
| 12 C | 0.002846  |          |          |          |          |    |  |  |  |
| 14 C | -0.076724 |          |          |          |          |    |  |  |  |
| 15 C | -0.010137 |          |          |          |          |    |  |  |  |
| 18 C | -0.016125 |          |          |          |          |    |  |  |  |
| 20 C | -0.008428 |          |          |          |          |    |  |  |  |
| 22 C | -0.014061 |          |          |          |          |    |  |  |  |
| 23 C | -0.029550 |          |          |          |          |    |  |  |  |
| 24 O | -0.181007 |          |          |          |          |    |  |  |  |
| 25 P | -0.167847 |          |          |          |          |    |  |  |  |
| 26 C | -0.000449 |          |          |          |          |    |  |  |  |
| 15 C | 2.297050  | 3.766665 | 4.847183 | 4.967518 | 5.423786 |    |  |  |  |
| 16 H | 2.996751  | 5.339592 | 7.526648 | 7.268782 | 7.223662 |    |  |  |  |
| 17 H | 3.025100  | 3.909465 | 4.303729 | 4.643284 | 5.224269 |    |  |  |  |
| 18 C | 2.309188  | 3.792789 | 5.201962 | 5.164251 | 5.742245 |    |  |  |  |
| 19 H | 3.027465  | 3.933715 | 5.009568 | 5.012004 | 5.812100 |    |  |  |  |
| 20 C | 2.301472  | 4.328538 | 6.286843 | 6.075235 | 6.413944 |    |  |  |  |
| 21 H | 3.009719  | 4.858873 | 6.967130 | 6.659803 | 7.005918 |    |  |  |  |
| 22 C | 2.287400  | 4.612565 | 6.615244 | 6.428904 | 6.535643 |    |  |  |  |
| 23 C | 1.840515  | 2.648311 | 5.047753 | 4.519400 | 3.940011 |    |  |  |  |
| 24 O | 2.991606  | 3.465849 | 5.673460 | 5.112783 | 4.248726 |    |  |  |  |
| 25 P | 2.280170  | 2.437103 | 5.156010 | 4.401096 | 4.375641 |    |  |  |  |
| 26 C | 3.510448  | 3.381733 | 6.154886 | 5.229096 | 4.718107 |    |  |  |  |
| 27 H | 4.375649  | 3.738187 | 6.272498 | 5.265742 | 4.764651 |    |  |  |  |
| 28 H | 3.543005  | 3.352839 | 6.063962 | 5.151281 | 4.384596 |    |  |  |  |
| 29 H | 3.985391  | 4.340150 | 7.165289 | 6.272310 | 5.792364 |    |  |  |  |
|      |           | 6        | 7        | 8        | 9        | 10 |  |  |  |
| 6 H  | 0.000000  |          |          |          |          |    |  |  |  |
| 7 H  | 4.359297  | 0.000000 |          |          |          |    |  |  |  |
| 8 C  | 3.346645  | 2.235675 | 0.000000 |          |          |    |  |  |  |
| 9 H  | 4.356537  | 2.689468 | 1.079265 | 0.000000 |          |    |  |  |  |
| 10 C | 2.234276  | 3.345211 | 1.422518 | 2.236826 | 0.000000 |    |  |  |  |
| 11 H | 2.686695  | 4.354366 | 2.233849 | 2.694242 | 1.078707 |    |  |  |  |
| 12 C | 1.078807  | 3.350050 | 2.304049 | 3.347230 | 1.421089 |    |  |  |  |
| 13 H | 7.035033  | 6.129551 | 6.648175 | 7.007402 | 6.955982 |    |  |  |  |
| 14 C | 6.331113  | 6.076733 | 6.285913 | 6.719404 | 6.389882 |    |  |  |  |
| 15 C | 5.291648  | 5.705931 | 5.882709 | 6.519359 | 5.775486 |    |  |  |  |
| 16 H | 7.501294  | 7.448774 | 7.166889 | 7.361735 | 7.210287 |    |  |  |  |
| 17 H | 5.169375  | 5.428121 | 5.922316 | 6.653799 | 5.863473 |    |  |  |  |
| 18 C | 4.895301  | 6.251998 | 5.924359 | 6.576725 | 5.514033 |    |  |  |  |
| 19 H | 4.342299  | 6.449153 | 5.976340 | 6.736265 | 5.339199 |    |  |  |  |
| 20 C | 5.800042  | 6.900729 | 6.361671 | 6.823333 | 6.017070 |    |  |  |  |
| 21 H | 6.085637  | 7.588485 | 6.762843 | 7.174931 | 6.272331 |    |  |  |  |
| 22 C | 6.612559  | 6.816076 | 6.585352 | 6.921701 | 6.542193 |    |  |  |  |
| 23 C | 5.502542  | 4.026231 | 3.861637 | 3.898444 | 4.438072 |    |  |  |  |
| 24 O | 6.337871  | 4.106510 | 4.141602 | 3.912872 | 4.994810 |    |  |  |  |
| 25 P | 4.031785  | 5.117301 | 3.664804 | 3.939750 | 3.218013 |    |  |  |  |
| 26 C | 5.207602  | 5.314923 | 3.647919 | 3.387601 | 3.618673 |    |  |  |  |
| 27 H | 5.050184  | 5.459498 | 3.489609 | 3.168453 | 3.299125 |    |  |  |  |
| 28 H | 5.582465  | 4.786065 | 3.409687 | 2.947596 | 3.804144 |    |  |  |  |
| 29 H | 6.120385  | 6.353736 | 4.741469 | 4.431336 | 4.661975 |    |  |  |  |
|      |           | 11       | 12       | 13       | 14       | 15 |  |  |  |
| 11 H | 0.000000  |          |          |          |          |    |  |  |  |
| 12 C | 2.229637  | 0.000000 |          |          |          |    |  |  |  |
| 13 H | 7.538354  | 6.662220 | 0.000000 |          |          |    |  |  |  |
| 14 C | 6.888021  | 6.067596 | 1.079396 | 0.000000 |          |    |  |  |  |
| 15 C | 6.321982  | 5.188748 | 2.233280 | 1.421681 | 0.000000 |    |  |  |  |

|  |      |          |          |          |          |          |
|--|------|----------|----------|----------|----------|----------|
|  | 16 H | 7.424345 | 7.241652 | 2.688751 | 2.235418 | 3.348311 |
|  | 17 H | 6.543444 | 5.077272 | 2.691282 | 2.234444 | 1.078428 |
|  | 18 C | 5.847490 | 4.988296 | 3.334695 | 2.291073 | 1.417640 |
|  | 19 H | 5.618992 | 4.656042 | 4.346529 | 3.335538 | 2.230907 |
|  | 20 C | 6.186342 | 5.798594 | 3.332836 | 2.290319 | 2.298176 |
|  | 21 H | 6.257055 | 6.171000 | 4.344042 | 3.334668 | 3.339294 |
|  | 22 C | 6.827126 | 6.413754 | 2.232283 | 1.422852 | 2.306039 |
|  | 23 C | 4.911313 | 4.783034 | 3.398430 | 3.249355 | 3.718678 |
|  | 24 O | 5.471653 | 5.503584 | 4.019390 | 4.118153 | 4.740868 |
|  | 25 P | 3.094717 | 3.716480 | 5.218634 | 4.446249 | 4.263199 |
|  | 26 C | 3.310553 | 4.644940 | 6.190557 | 5.635595 | 5.764795 |
|  | 27 H | 2.739856 | 4.511597 | 7.164157 | 6.581039 | 6.559374 |
|  | 28 H | 3.737357 | 4.848424 | 5.936314 | 5.559168 | 5.828093 |
|  | 29 H | 4.251570 | 5.648030 | 6.480871 | 5.911529 | 6.199480 |
|  |      | 16       | 17       | 18       | 19       | 20       |
|  | 16 H | 0.000000 |          |          |          |          |
|  | 17 H | 4.356871 | 0.000000 |          |          |          |
|  | 18 C | 3.341137 | 2.231835 | 0.000000 |          |          |
|  | 19 H | 4.348324 | 2.691372 | 1.079146 | 0.000000 |          |
|  | 20 C | 2.230133 | 3.341147 | 1.419824 | 2.229258 | 0.000000 |
|  | 21 H | 2.688700 | 4.348525 | 2.228705 | 2.679103 | 1.079121 |
|  | 22 C | 1.078771 | 3.348061 | 2.297642 | 3.338682 | 1.415182 |
|  | 23 C | 3.715269 | 4.222654 | 4.105296 | 4.839709 | 3.946094 |
|  | 24 O | 4.411466 | 5.168400 | 5.235230 | 5.991032 | 5.008080 |
|  | 25 P | 4.448878 | 4.928915 | 3.615992 | 3.801778 | 3.413029 |
|  | 26 C | 5.276150 | 6.421030 | 5.323963 | 5.632223 | 4.902682 |
|  | 27 H | 6.324294 | 7.136195 | 6.047842 | 6.197747 | 5.751682 |
|  | 28 H | 5.318198 | 6.416415 | 5.648717 | 6.084316 | 5.269256 |
|  | 29 H | 5.122617 | 6.979216 | 5.657022 | 6.024012 | 4.973301 |
|  |      | 21       | 22       | 23       | 24       | 25       |
|  | 21 H | 0.000000 |          |          |          |          |
|  | 22 C | 2.228156 | 0.000000 |          |          |          |
|  | 23 C | 4.575945 | 3.431602 | 0.000000 |          |          |
|  | 24 O | 5.605658 | 4.328453 | 1.155971 | 0.000000 |          |
|  | 25 P | 3.419318 | 3.983572 | 3.001110 | 3.891598 | 0.000000 |
|  | 26 C | 4.846909 | 5.124289 | 3.220029 | 3.595213 | 1.857710 |
|  | 27 H | 5.630348 | 6.113374 | 4.127412 | 4.444351 | 2.440735 |
|  | 28 H | 5.394025 | 5.221997 | 2.682101 | 2.754787 | 2.530771 |
|  | 29 H | 4.741199 | 5.162242 | 3.769624 | 4.090217 | 2.418147 |
|  |      | 26       | 27       | 28       | 29       |          |
|  | 26 C | 0.000000 |          |          |          |          |
|  | 27 H | 1.094820 | 0.000000 |          |          |          |
|  | 28 H | 1.089165 | 1.782782 | 0.000000 |          |          |
|  | 29 H | 1.094749 | 1.754624 | 1.774646 | 0.000000 |          |

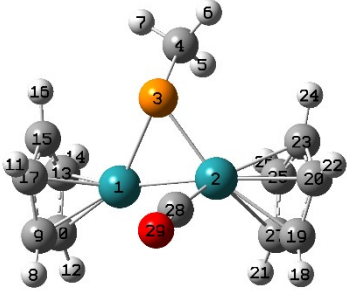

4S -1070.806729 29.77 C1  
WBI 1.03

Charges and spin densities

1

1 Ru 0.312491  
2 Ru 0.173673  
3 P -0.166967  
4 C -0.019714  
9 C -0.000459  
10 C -0.026777  
13 C -0.001601  
15 C -0.001751  
17 C 0.029750  
19 C -0.066560  
20 C -0.012438  
23 C -0.040922  
25 C -0.036953  
27 C 0.000218  
28 C 0.031045  
29 O -0.173036

|      | 1        | 2        | 3        | 4        | 5        |  |
|------|----------|----------|----------|----------|----------|--|
| 1 Ru | 0.000000 |          |          |          |          |  |
| 2 Ru | 2.370834 | 0.000000 |          |          |          |  |
| 3 P  | 2.446979 | 2.280952 | 0.000000 |          |          |  |
| 4 C  | 3.532881 | 3.349534 | 1.863130 | 0.000000 |          |  |
| 5 H  | 3.566900 | 3.286107 | 2.527045 | 1.089793 | 0.000000 |  |
| 6 H  | 4.482555 | 3.861703 | 2.433621 | 1.094989 | 1.781902 |  |
| 7 H  | 3.851183 | 4.230836 | 2.444817 | 1.094959 | 1.778135 |  |
| 8 H  | 2.881036 | 4.713355 | 4.950535 | 6.291990 | 6.418468 |  |
| 9 C  | 2.151803 | 4.322729 | 4.272134 | 5.429545 | 5.543708 |  |
| 10 C | 2.162932 | 4.356032 | 4.480138 | 5.209066 | 5.067455 |  |
| 11 H | 2.855858 | 4.642543 | 3.618012 | 4.973488 | 5.516465 |  |
| 12 H | 2.889016 | 4.759962 | 5.281966 | 5.922625 | 5.615714 |  |
| 13 C | 2.150261 | 4.330707 | 3.891646 | 4.218688 | 4.100194 |  |
| 14 H | 2.893317 | 4.747843 | 4.338088 | 4.207113 | 3.881670 |  |
| 15 C | 2.150526 | 4.307630 | 3.229679 | 3.814263 | 4.072427 |  |
| 16 H | 2.882987 | 4.692960 | 3.126976 | 3.380648 | 3.810129 |  |
| 17 C | 2.128702 | 4.275683 | 3.487363 | 4.644893 | 4.999470 |  |
| 18 H | 4.817872 | 2.978589 | 5.197005 | 6.160553 | 5.888224 |  |
| 19 C | 4.291170 | 2.270067 | 4.486686 | 5.232147 | 4.884765 |  |
| 20 C | 4.607806 | 2.267542 | 4.019653 | 4.556221 | 4.313901 |  |
| 21 H | 3.920073 | 3.051196 | 5.088677 | 5.565132 | 4.933791 |  |
| 22 H | 5.338331 | 2.972384 | 4.411708 | 5.039513 | 4.969508 |  |
| 23 C | 4.295843 | 2.270482 | 3.573456 | 3.563555 | 3.113091 |  |
| 24 H | 4.826353 | 2.981428 | 3.616377 | 3.183650 | 2.792990 |  |
| 25 C | 3.767649 | 2.307164 | 3.859574 | 3.814026 | 3.098369 |  |
| 26 H | 3.900894 | 3.032220 | 4.132313 | 3.689169 | 2.759294 |  |
| 27 C | 3.772861 | 2.316910 | 4.417595 | 4.865401 | 4.289112 |  |
| 28 C | 2.654176 | 1.848382 | 2.858660 | 4.543250 | 4.795092 |  |
| 29 O | 3.471676 | 2.995885 | 3.726939 | 5.520853 | 5.874023 |  |
|      | 6        | 7        | 8        | 9        | 10       |  |
| 6 H  | 0.000000 |          |          |          |          |  |
| 7 H  | 1.754982 | 0.000000 |          |          |          |  |
| 8 H  | 7.221577 | 6.406723 | 0.000000 |          |          |  |
| 9 C  | 6.410489 | 5.457331 | 1.079372 | 0.000000 |          |  |
| 10 C | 6.270148 | 5.218054 | 2.234375 | 1.418735 | 0.000000 |  |
| 11 H | 5.767183 | 4.834167 | 2.693315 | 2.239366 | 3.343160 |  |
| 12 H | 6.978391 | 6.013880 | 2.693074 | 2.231671 | 1.079966 |  |
| 13 C | 5.308864 | 4.035651 | 3.350904 | 2.306954 | 1.426770 |  |
| 14 H | 5.290804 | 3.961683 | 4.359547 | 3.348927 | 2.238827 |  |
| 15 C | 4.827673 | 3.492722 | 3.349136 | 2.306817 | 2.300272 |  |
| 16 H | 4.313581 | 2.804322 | 4.357000 | 3.348646 | 3.343722 |  |
| 17 C | 5.571331 | 4.516017 | 2.236595 | 1.427284 | 2.300508 |  |
| 18 H | 6.471537 | 7.128485 | 6.145265 | 6.197194 | 6.233150 |  |
| 19 C | 5.538549 | 6.223276 | 6.082450 | 5.945359 | 5.836293 |  |
| 20 C | 4.608246 | 5.627296 | 6.796023 | 6.520077 | 6.454983 |  |

|  |    |   |          |          |          |          |          |
|--|----|---|----------|----------|----------|----------|----------|
|  | 21 | H | 6.193356 | 6.353713 | 5.461764 | 5.253984 | 4.698941 |
|  | 22 | H | 4.898276 | 6.115703 | 7.422581 | 7.204008 | 7.291779 |
|  | 23 | C | 3.646149 | 4.629136 | 6.865863 | 6.380739 | 6.087246 |
|  | 24 | H | 2.990576 | 4.245293 | 7.550460 | 6.970435 | 6.671782 |
|  | 25 | C | 4.243781 | 4.736421 | 6.239120 | 5.728826 | 5.190321 |
|  | 26 | H | 4.223916 | 4.460625 | 6.437837 | 5.798883 | 5.035769 |
|  | 27 | C | 5.367076 | 5.761036 | 5.722311 | 5.439297 | 5.015526 |
|  | 28 | C | 5.029542 | 5.236530 | 3.904337 | 3.860890 | 4.467732 |
|  | 29 | O | 5.961938 | 6.134913 | 3.917746 | 4.134637 | 5.017026 |
|  |    |   | 11       | 12       | 13       | 14       | 15       |
|  | 11 | H | 0.000000 |          |          |          |          |
|  | 12 | H | 4.353892 | 0.000000 |          |          |          |
|  | 13 | C | 3.347386 | 2.234823 | 0.000000 |          |          |
|  | 14 | H | 4.357752 | 2.690184 | 1.079177 | 0.000000 |          |
|  | 15 | C | 2.238437 | 3.342176 | 1.420729 | 2.234632 | 0.000000 |
|  | 16 | H | 2.691975 | 4.351890 | 2.232737 | 2.692528 | 1.078663 |
|  | 17 | C | 1.078848 | 3.344472 | 2.305424 | 3.349089 | 1.426577 |
|  | 18 | H | 6.980656 | 6.199906 | 6.696060 | 7.082969 | 6.959246 |
|  | 19 | C | 6.675164 | 5.864766 | 6.097192 | 6.379385 | 6.381217 |
|  | 20 | C | 6.842333 | 6.664524 | 6.433122 | 6.659615 | 6.513181 |
|  | 21 | H | 6.638804 | 4.383521 | 5.109572 | 5.210607 | 5.864102 |
|  | 22 | H | 7.276580 | 7.571404 | 7.261321 | 7.549913 | 7.181970 |
|  | 23 | C | 6.718801 | 6.328386 | 5.800180 | 5.834730 | 5.961136 |
|  | 24 | H | 7.061963 | 7.009430 | 6.174433 | 6.126066 | 6.213371 |
|  | 25 | C | 6.502992 | 5.257109 | 4.999040 | 4.933249 | 5.474050 |
|  | 26 | H | 6.665913 | 5.063708 | 4.662196 | 4.375927 | 5.295229 |
|  | 27 | C | 6.483499 | 4.919044 | 5.219139 | 5.338702 | 5.766511 |
|  | 28 | C | 3.872040 | 4.973761 | 4.788824 | 5.531317 | 4.460106 |
|  | 29 | O | 3.937631 | 5.529799 | 5.499217 | 6.354089 | 5.045321 |
|  |    |   | 16       | 17       | 18       | 19       | 20       |
|  | 16 | H | 0.000000 |          |          |          |          |
|  | 17 | C | 2.235492 | 0.000000 |          |          |          |
|  | 18 | H | 7.535257 | 6.643402 | 0.000000 |          |          |
|  | 19 | C | 6.871658 | 6.267334 | 1.079487 | 0.000000 |          |
|  | 20 | C | 6.789735 | 6.539491 | 2.231015 | 1.421754 | 0.000000 |
|  | 21 | H | 6.534281 | 5.924563 | 2.689532 | 2.233513 | 3.347525 |
|  | 22 | H | 7.388581 | 7.118114 | 2.688007 | 2.234912 | 1.078713 |
|  | 23 | C | 6.118369 | 6.291755 | 3.333474 | 2.290682 | 1.417829 |
|  | 24 | H | 6.183582 | 6.688377 | 4.343888 | 3.334458 | 2.229229 |
|  | 25 | C | 5.796367 | 5.877559 | 3.332860 | 2.289527 | 2.299235 |
|  | 26 | H | 5.562870 | 5.930126 | 4.343217 | 3.333152 | 3.341431 |
|  | 27 | C | 6.303390 | 5.869432 | 2.232222 | 1.420889 | 2.305645 |
|  | 28 | C | 4.971007 | 3.836539 | 3.322160 | 3.196419 | 3.435740 |
|  | 29 | O | 5.584577 | 4.137763 | 3.885008 | 4.028804 | 4.328926 |
|  |    |   | 21       | 22       | 23       | 24       | 25       |
|  | 21 | H | 0.000000 |          |          |          |          |

|                                                                                                                                                                                                                                                                                                                                                                                                                                                                                                                                                                                                                                                           |                                                                                                                                                                                                                                                                                                                                                                                                                                                                                                                                                                                                                                                                                                                                                                                                                                                                                                                                                                                                                                                                                                                                                                                                                                                                                                                                                                                                                                                                                                                                                                                                                                                                                                                                                                                                                                                                                                                                                                    |
|-----------------------------------------------------------------------------------------------------------------------------------------------------------------------------------------------------------------------------------------------------------------------------------------------------------------------------------------------------------------------------------------------------------------------------------------------------------------------------------------------------------------------------------------------------------------------------------------------------------------------------------------------------------|--------------------------------------------------------------------------------------------------------------------------------------------------------------------------------------------------------------------------------------------------------------------------------------------------------------------------------------------------------------------------------------------------------------------------------------------------------------------------------------------------------------------------------------------------------------------------------------------------------------------------------------------------------------------------------------------------------------------------------------------------------------------------------------------------------------------------------------------------------------------------------------------------------------------------------------------------------------------------------------------------------------------------------------------------------------------------------------------------------------------------------------------------------------------------------------------------------------------------------------------------------------------------------------------------------------------------------------------------------------------------------------------------------------------------------------------------------------------------------------------------------------------------------------------------------------------------------------------------------------------------------------------------------------------------------------------------------------------------------------------------------------------------------------------------------------------------------------------------------------------------------------------------------------------------------------------------------------------|
|                                                                                                                                                                                                                                                                                                                                                                                                                                                                                                                                                                                                                                                           | 22 H 4.356253 0.000000<br>23 C 3.341351 2.232528 0.000000<br>24 H 4.349756 2.689180 1.079102 0.000000<br>25 C 2.229465 3.342858 1.421483 2.232780 0.000000<br>26 H 2.685074 4.351784 2.232732 2.687759 1.079231<br>27 C 1.078473 3.347934 2.298209 3.340087 1.415356<br>28 C 4.128117 3.745538 3.955097 4.621345 4.079493<br>29 O 5.013595 4.453447 5.022566 5.673913 5.193687<br>26    27    28    29<br>26 H 0.000000<br>27 C 2.226645 0.000000<br>28 C 4.819468 3.654806 0.000000<br>29 O 5.956144 4.636450 1.153651 0.000000                                                                                                                                                                                                                                                                                                                                                                                                                                                                                                                                                                                                                                                                                                                                                                                                                                                                                                                                                                                                                                                                                                                                                                                                                                                                                                                                                                                                                                   |
| 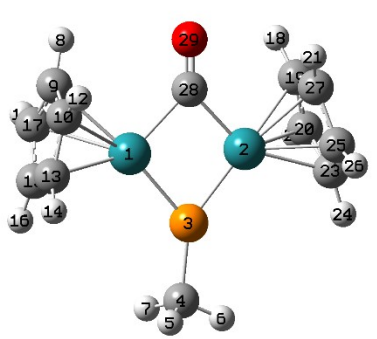 <p>5T. -1070.806524 29.90 C2v</p> <p>WBI 1.00</p> <p>Charge and spin density<br/>1</p> <p>1 Ru 0.312491<br/>           2 Ru 0.173673<br/>           3 P -0.166967<br/>           4 C -0.019714<br/>           9 C -0.000459<br/>           10 C -0.026777<br/>           13 C -0.001601<br/>           15 C -0.001751<br/>           17 C 0.029750<br/>           19 C -0.066560<br/>           20 C -0.012438<br/>           23 C -0.040922<br/>           25 C -0.036953<br/>           27 C 0.000218<br/>           28 C 0.031045<br/>           29 O -0.173036</p> | <p>        1    2    3    4    5</p> <p>1 Ru 0.000000<br/>           2 Ru 2.769997 0.000000<br/>           3 P 2.205566 2.143262 0.000000<br/>           4 C 3.723059 3.795525 1.824365 0.000000<br/>           5 H 4.006648 4.426809 2.422574 1.092157 0.000000<br/>           6 H 4.559304 3.980299 2.426037 1.090862 1.780593<br/>           7 H 3.974117 4.405522 2.422423 1.092149 1.773611<br/>           8 H 3.069191 5.015440 5.216730 6.722023 6.992231<br/>           9 C 2.363541 4.757699 4.541250 5.901517 6.092660<br/>           10 C 2.312349 4.831385 4.373519 5.618194 5.567343<br/>           11 H 3.122983 5.248073 4.686045 5.689749 6.111425<br/>           12 H 3.010114 5.167757 4.955777 6.260725 6.123229<br/>           13 C 2.261150 4.947630 3.865203 4.714982 4.538736<br/>           14 H 2.960344 5.406462 4.105173 4.657308 4.234675<br/>           15 C 2.295602 4.959231 3.739234 4.461457 4.526905<br/>           16 H 3.009672 5.426393 3.879058 4.160279 4.209561<br/>           17 C 2.412293 4.901867 4.238310 5.309933 5.580662<br/>           18 H 4.768875 2.937977 4.919172 6.535075 7.292371<br/>           19 C 4.538305 2.211336 4.290471 5.833314 6.567583<br/>           20 C 4.749793 2.187607 3.871033 5.096174 5.948091<br/>           21 H 4.801466 2.938135 4.920616 6.553392 6.981322<br/>           22 H 5.169123 2.922440 4.233738 5.262973 6.227744<br/>           23 C 4.905221 2.182384 3.600378 4.606112 5.323691<br/>           24 H 5.430236 2.909875 3.746354 4.315400 5.037962<br/>           25 C 4.779954 2.189819 3.874883 5.118529 5.620235<br/>           26 H 5.219037 2.923812 4.237915 5.301388 5.620224<br/>           27 C 4.558504 2.213089 4.292910 5.845480 6.387055<br/>           28 C 2.027076 1.994525 3.132822 4.952493 5.401382<br/>           29 O 2.976473 2.974608 4.308723 6.127629 6.552455<br/>                   6    7    8    9    10<br/>           6 H 0.000000</p> |



|  |      |          |          |          |          |          |
|--|------|----------|----------|----------|----------|----------|
|  | 7 H  | 1.780688 | 0.000000 |          |          |          |
|  | 8 H  | 7.572512 | 6.767642 | 0.000000 |          |          |
|  | 9 C  | 6.821454 | 5.916620 | 1.079669 | 0.000000 |          |
|  | 10 C | 6.572329 | 5.795994 | 2.227390 | 1.421163 | 0.000000 |
|  | 11 H | 6.585725 | 5.315964 | 2.681066 | 2.224531 | 3.343092 |
|  | 12 H | 7.159851 | 6.577826 | 2.676447 | 2.230880 | 1.079519 |
|  | 13 C | 5.751460 | 4.791873 | 3.334023 | 2.293009 | 1.418013 |
|  | 14 H | 5.687159 | 4.821004 | 4.347520 | 3.339269 | 2.236398 |
|  | 15 C | 5.511201 | 4.238173 | 3.328083 | 2.284278 | 2.299023 |
|  | 16 H | 5.219851 | 3.719299 | 4.339637 | 3.328482 | 3.340507 |
|  | 17 C | 6.270570 | 5.086246 | 2.225319 | 1.411576 | 2.300218 |
|  | 18 H | 6.626924 | 6.927686 | 5.431622 | 5.743421 | 6.326558 |
|  | 19 C | 5.824858 | 6.342991 | 5.782090 | 5.919166 | 6.300315 |
|  | 20 C | 4.892454 | 5.567479 | 6.524208 | 6.475203 | 6.826593 |
|  | 21 H | 6.643567 | 7.284894 | 5.821982 | 6.003443 | 6.001734 |
|  | 22 H | 5.019440 | 5.548019 | 6.861865 | 6.808664 | 7.311157 |
|  | 23 C | 4.236493 | 5.301056 | 7.120234 | 6.926386 | 6.993821 |
|  | 24 H | 3.714287 | 5.020701 | 7.899127 | 7.596825 | 7.598562 |
|  | 25 C | 4.913811 | 5.948721 | 6.808934 | 6.676581 | 6.571355 |
|  | 26 H | 5.056581 | 6.248951 | 7.364364 | 7.164750 | 6.852560 |
|  | 27 C | 5.835866 | 6.553216 | 5.982165 | 6.056522 | 6.131409 |
|  | 28 C | 5.476491 | 5.384366 | 3.179669 | 3.146673 | 3.389408 |
|  | 29 O | 6.642924 | 6.539076 | 2.953352 | 3.300270 | 3.684173 |
|  |      | 11       | 12       | 13       | 14       | 15       |
|  | 11 H | 0.000000 |          |          |          |          |
|  | 12 H | 4.348412 | 0.000000 |          |          |          |
|  | 13 C | 3.348477 | 2.235782 | 0.000000 |          |          |
|  | 14 H | 4.354966 | 2.704625 | 1.079449 | 0.000000 |          |
|  | 15 C | 2.229548 | 3.345888 | 1.430237 | 2.239008 | 0.000000 |
|  | 16 H | 2.689637 | 4.354959 | 2.237978 | 2.688776 | 1.079501 |
|  | 17 C | 1.079924 | 3.340444 | 2.304045 | 3.344105 | 1.416074 |
|  | 18 H | 6.113481 | 6.558997 | 6.925209 | 7.651918 | 6.773531 |
|  | 19 C | 6.351243 | 6.518033 | 6.750767 | 7.357681 | 6.681710 |
|  | 20 C | 6.555926 | 7.187914 | 6.998036 | 7.527796 | 6.774372 |
|  | 21 H | 7.149305 | 5.842679 | 6.670465 | 7.121985 | 7.061287 |
|  | 22 H | 6.535418 | 7.793824 | 7.401280 | 7.984775 | 6.972997 |
|  | 23 C | 7.217135 | 7.265285 | 7.029593 | 7.366257 | 6.997345 |
|  | 24 H | 7.735493 | 7.923446 | 7.450750 | 7.687432 | 7.370314 |
|  | 25 C | 7.403911 | 6.636981 | 6.783963 | 7.068632 | 7.024522 |
|  | 26 H | 8.065529 | 6.805690 | 7.011858 | 7.144940 | 7.423583 |
|  | 27 C | 6.903123 | 6.147805 | 6.615275 | 7.071706 | 6.839926 |
|  | 28 C | 4.183250 | 3.640451 | 4.002321 | 4.704046 | 4.157723 |
|  | 29 O | 4.574174 | 3.731452 | 4.623137 | 5.386769 | 4.851543 |
|  |      | 16       | 17       | 18       | 19       | 20       |
|  | 16 H | 0.000000 |          |          |          |          |
|  | 17 C | 2.230253 | 0.000000 |          |          |          |

|  |      |          |          |          |          |          |
|--|------|----------|----------|----------|----------|----------|
|  | 18 H | 7.392717 | 6.106276 | 0.000000 |          |          |
|  | 19 C | 7.238497 | 6.232198 | 1.078808 | 0.000000 |          |
|  | 20 C | 7.132890 | 6.506323 | 2.233652 | 1.420707 | 0.000000 |
|  | 21 H | 7.798507 | 6.727798 | 2.683755 | 2.232578 | 3.343780 |
|  | 22 H | 7.223877 | 6.651649 | 2.690624 | 2.232380 | 1.078961 |
|  | 23 C | 7.308225 | 6.993158 | 3.343834 | 2.300152 | 1.425489 |
|  | 24 H | 7.540009 | 7.521785 | 4.353763 | 3.342952 | 2.236707 |
|  | 25 C | 7.497352 | 7.015440 | 3.343939 | 2.303001 | 2.307761 |
|  | 26 H | 7.888101 | 7.564549 | 4.352590 | 3.345705 | 3.351096 |
|  | 27 C | 7.462907 | 6.564938 | 2.233197 | 1.424102 | 2.302995 |
|  | 28 C | 4.951275 | 3.725728 | 3.018538 | 2.919364 | 3.639709 |
|  | 29 O | 5.752532 | 4.171017 | 2.939238 | 3.159398 | 4.218157 |
|  |      | 21       | 22       | 23       | 24       | 25       |
|  | 21 H | 0.000000 |          |          |          |          |
|  | 22 H | 4.352397 | 0.000000 |          |          |          |
|  | 23 C | 3.343505 | 2.238862 | 0.000000 |          |          |
|  | 24 H | 4.353370 | 2.696235 | 1.079044 | 0.000000 |          |
|  | 25 C | 2.233085 | 3.351156 | 1.425665 | 2.236838 | 0.000000 |
|  | 26 H | 2.690204 | 4.361751 | 2.238927 | 2.696195 | 1.078972 |
|  | 27 C | 1.078829 | 3.345696 | 2.299734 | 3.342460 | 1.419936 |
|  | 28 C | 3.005381 | 4.267867 | 4.024953 | 4.874692 | 3.631810 |
|  | 29 O | 2.899857 | 4.854640 | 4.750694 | 5.707422 | 4.195628 |
|  |      | 26       | 27       | 28       | 29       |          |
|  | 26 H | 0.000000 |          |          |          |          |
|  | 27 C | 2.231760 | 0.000000 |          |          |          |
|  | 28 C | 4.253466 | 2.914202 | 0.000000 |          |          |
|  | 29 O | 4.816390 | 3.141851 | 1.176094 | 0.000000 |          |

Table S4. Distance matrix for the lowest energy MePCp<sub>2</sub>Ru<sub>2</sub>(CO)<sub>2</sub> structures as optimized at the PBE0/def2TZVP level. Included are the ranking order, spin multiplicity (S, T or Q), total energy (in a.u.), relative energy (in kcal/mol), symmetry point group Wiberg bond indices for the Fe-Fe bonds, Mulliken charges and the spin density (Cp moieties are omitted for clarity).

|                                                                                     |          |          |          |          |          |          |  |
|-------------------------------------------------------------------------------------|----------|----------|----------|----------|----------|----------|--|
| 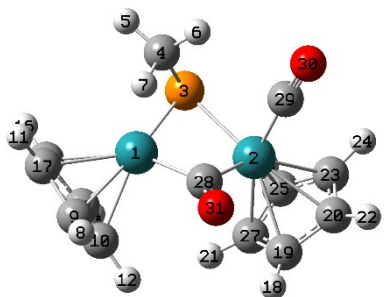 |          | 1        | 2        | 3        | 4        | 5        |  |
|                                                                                     | 1 Ru     | 0.000000 |          |          |          |          |  |
|                                                                                     | 2 Ru     | 2.752127 | 0.000000 |          |          |          |  |
|                                                                                     | 3 P      | 2.294285 | 2.339567 | 0.000000 |          |          |  |
|                                                                                     | 4 C      | 2.350371 | 3.258717 | 1.843662 | 0.000000 |          |  |
|                                                                                     | 5 H      | 2.995565 | 4.282599 | 2.476385 | 1.088979 | 0.000000 |  |
|                                                                                     | 6 H      | 3.139723 | 3.378567 | 2.507522 | 1.089851 | 1.794772 |  |
|                                                                                     | 7 H      | 1.825726 | 3.389591 | 2.567433 | 1.189212 | 1.808049 |  |
|                                                                                     | 8 H      | 2.969370 | 5.020744 | 5.260394 | 4.858732 | 5.316741 |  |
|                                                                                     | 9 C      | 2.243150 | 4.585644 | 4.504717 | 4.308062 | 4.704599 |  |
| 10 C                                                                                | 2.163149 | 3.993800 | 4.098036 | 4.501424 | 5.016038 |          |  |

1S -1184.12183 0.00 C1  
WBI 0.37

| Charge and spin densities |    |           |          |          |          |          |  |
|---------------------------|----|-----------|----------|----------|----------|----------|--|
| 1                         | Ru | 0.244728  |          |          |          |          |  |
| 2                         | Ru | 0.306428  |          |          |          |          |  |
| 3                         | P  | -0.200694 |          |          |          |          |  |
| 4                         | C  | 0.137361  |          |          |          |          |  |
| 9                         | C  | 0.034990  |          |          |          |          |  |
| 10                        | C  | -0.065086 |          |          |          |          |  |
| 13                        | C  | -0.014545 |          |          |          |          |  |
| 15                        | C  | -0.027759 |          |          |          |          |  |
| 17                        | C  | 0.002684  |          |          |          |          |  |
| 19                        | C  | 0.005632  |          |          |          |          |  |
| 20                        | C  | 0.003243  |          |          |          |          |  |
| 23                        | C  | -0.036288 |          |          |          |          |  |
| 25                        | C  | 0.027926  |          |          |          |          |  |
| 27                        | C  | 0.001861  |          |          |          |          |  |
| 28                        | C  | 0.007168  |          |          |          |          |  |
| 29                        | C  | -0.055160 |          |          |          |          |  |
| 30                        | O  | -0.148637 |          |          |          |          |  |
| 31                        | O  | -0.223851 |          |          |          |          |  |
| 11                        | H  | 2.971071  | 5.684111 | 4.752757 | 3.940336 | 3.821071 |  |
| 12                        | H  | 2.896637  | 4.014589 | 4.639252 | 5.225220 | 5.868437 |  |
| 13                        | C  | 2.179558  | 4.135714 | 3.520277 | 4.185010 | 4.498008 |  |
| 14                        | H  | 2.913413  | 4.270301 | 3.625215 | 4.693317 | 5.004189 |  |
| 15                        | C  | 2.218502  | 4.740675 | 3.579707 | 3.705213 | 3.715779 |  |
| 16                        | H  | 2.961333  | 5.322644 | 3.723027 | 3.841538 | 3.573604 |  |
| 17                        | C  | 2.233565  | 4.965464 | 4.185480 | 3.770834 | 3.855001 |  |
| 18                        | H  | 4.349672  | 2.991726 | 5.035529 | 5.892955 | 6.887891 |  |
| 19                        | C  | 4.146375  | 2.272610 | 4.342179 | 5.412689 | 6.409066 |  |
| 20                        | C  | 4.777009  | 2.241610 | 4.455958 | 5.457098 | 6.497192 |  |
| 21                        | H  | 3.735034  | 3.010927 | 3.907553 | 5.353988 | 6.111009 |  |
| 22                        | H  | 5.458268  | 2.962910 | 5.234868 | 5.990034 | 7.062115 |  |
| 23                        | C  | 4.847245  | 2.210149 | 3.862463 | 5.154463 | 6.100645 |  |
| 24                        | H  | 5.592718  | 2.936020 | 4.275681 | 5.486700 | 6.385827 |  |
| 25                        | C  | 4.312952  | 2.266091 | 3.350438 | 4.959270 | 5.793995 |  |
| 26                        | H  | 4.650979  | 2.983642 | 3.309719 | 5.085338 | 5.769329 |  |
| 27                        | C  | 3.805297  | 2.276625 | 3.665844 | 5.096484 | 5.966343 |  |
| 28                        | C  | 1.975535  | 2.083774 | 3.258987 | 3.228680 | 4.202273 |  |
| 29                        | C  | 3.627738  | 1.838339 | 2.966496 | 3.021190 | 4.058215 |  |
| 30                        | O  | 4.528427  | 2.985881 | 3.819598 | 3.477458 | 4.398814 |  |
| 31                        | O  | 2.982693  | 3.007052 | 4.419783 | 4.195009 | 5.140026 |  |
|                           |    | 6         | 7        | 8        | 9        | 10       |  |
| 6                         | H  | 0.000000  |          |          |          |          |  |
| 7                         | H  | 1.721660  | 0.000000 |          |          |          |  |
| 8                         | H  | 5.420393  | 3.792759 | 0.000000 |          |          |  |
| 9                         | C  | 5.037534  | 3.384340 | 1.078932 | 0.000000 |          |  |
| 10                        | C  | 5.288810  | 3.852437 | 2.240279 | 1.428018 | 0.000000 |  |
| 11                        | H  | 4.731937  | 3.089223 | 2.678459 | 2.219940 | 3.332000 |  |
| 12                        | H  | 5.905857  | 4.600511 | 2.693270 | 2.236208 | 1.079574 |  |
| 13                        | C  | 5.144751  | 3.844436 | 3.359343 | 2.316965 | 1.429173 |  |
| 14                        | H  | 5.651226  | 4.580084 | 4.369005 | 3.359658 | 2.243083 |  |
| 15                        | C  | 4.739757  | 3.320170 | 3.351351 | 2.307765 | 2.298633 |  |
| 16                        | H  | 4.922432  | 3.712116 | 4.357625 | 3.347980 | 3.343962 |  |
| 17                        | C  | 4.646709  | 2.973520 | 2.225870 | 1.409778 | 2.287533 |  |
| 18                        | H  | 6.086977  | 5.564191 | 5.035557 | 4.925079 | 4.057688 |  |
| 19                        | C  | 5.593452  | 5.297378 | 5.466429 | 5.184775 | 4.241638 |  |
| 20                        | C  | 5.392933  | 5.527215 | 6.409102 | 6.160550 | 5.370206 |  |
| 21                        | H  | 5.926281  | 5.335572 | 5.293934 | 4.649730 | 3.334162 |  |
| 22                        | H  | 5.754693  | 5.995171 | 6.845099 | 6.745148 | 6.100097 |  |
| 23                        | C  | 5.135620  | 5.521883 | 7.020903 | 6.578495 | 5.714127 |  |
| 24                        | H  | 5.319264  | 6.010024 | 7.911419 | 7.467745 | 6.675173 |  |
| 25                        | C  | 5.236754  | 5.332445 | 6.590503 | 5.980239 | 4.932229 |  |
| 26                        | H  | 5.455090  | 5.630389 | 7.145611 | 6.412989 | 5.339945 |  |
| 27                        | C  | 5.490485  | 5.160099 | 5.586221 | 5.039996 | 3.886515 |  |
| 28                        | C  | 3.418152  | 2.599630 | 3.175027 | 3.051242 | 2.979949 |  |
| 29                        | C  | 2.521455  | 3.272499 | 5.758704 | 5.510013 | 5.328960 |  |

|  |    |   |          |          |          |          |          |
|--|----|---|----------|----------|----------|----------|----------|
|  | 30 | O | 2.649836 | 3.764798 | 6.492918 | 6.341703 | 6.327454 |
|  | 31 | O | 4.227150 | 3.408105 | 3.111340 | 3.374283 | 3.511246 |
|  |    |   | 11       | 12       | 13       | 14       | 15       |
|  | 11 | H | 0.000000 |          |          |          |          |
|  | 12 | H | 4.340226 | 0.000000 |          |          |          |
|  | 13 | C | 3.344074 | 2.240111 | 0.000000 |          |          |
|  | 14 | H | 4.355250 | 2.700798 | 1.079020 | 0.000000 |          |
|  | 15 | C | 2.236943 | 3.342047 | 1.420484 | 2.234300 | 0.000000 |
|  | 16 | H | 2.691813 | 4.355070 | 2.234640 | 2.695118 | 1.079240 |
|  | 17 | C | 1.080179 | 3.329551 | 2.301866 | 3.346338 | 1.428630 |
|  | 18 | H | 6.852509 | 3.309264 | 4.847003 | 4.920568 | 5.942250 |
|  | 19 | C | 6.914031 | 3.672457 | 4.738489 | 4.678281 | 5.808303 |
|  | 20 | C | 7.657015 | 4.943819 | 5.755905 | 5.700128 | 6.663320 |
|  | 21 | H | 6.282203 | 2.899264 | 3.309785 | 2.845735 | 4.599385 |
|  | 22 | H | 8.235529 | 5.644410 | 6.626364 | 6.666568 | 7.467664 |
|  | 23 | C | 7.816738 | 5.464993 | 5.744232 | 5.518335 | 6.581602 |
|  | 24 | H | 8.533963 | 6.495705 | 6.619959 | 6.381369 | 7.346529 |
|  | 25 | C | 7.230172 | 4.725824 | 4.738595 | 4.330393 | 5.686398 |
|  | 26 | H | 7.449669 | 5.267362 | 4.854736 | 4.284462 | 5.721912 |
|  | 27 | C | 6.611078 | 3.479396 | 3.969332 | 3.648822 | 5.113731 |
|  | 28 | C | 4.332563 | 3.100566 | 3.691924 | 4.305678 | 4.082093 |
|  | 29 | C | 6.166070 | 5.489511 | 5.518617 | 5.824408 | 5.755839 |
|  | 30 | O | 6.775902 | 6.527849 | 6.536098 | 6.896550 | 6.626439 |
|  | 31 | O | 4.801726 | 3.433333 | 4.518352 | 5.197883 | 4.912175 |
|  |    |   | 16       | 17       | 18       | 19       | 20       |
|  | 16 | H | 0.000000 |          |          |          |          |
|  | 17 | C | 2.240228 | 0.000000 |          |          |          |
|  | 18 | H | 6.824307 | 5.961824 | 0.000000 |          |          |
|  | 19 | C | 6.574056 | 6.017752 | 1.079351 | 0.000000 |          |
|  | 20 | C | 7.332338 | 6.859720 | 2.219431 | 1.408503 | 0.000000 |
|  | 21 | H | 5.235627 | 5.250457 | 2.696391 | 2.238089 | 3.337459 |
|  | 22 | H | 8.173984 | 7.509111 | 2.676017 | 2.222967 | 1.079092 |
|  | 23 | C | 7.065091 | 7.024183 | 3.340579 | 2.296520 | 1.434256 |
|  | 24 | H | 7.735072 | 7.808757 | 4.348873 | 3.338161 | 2.244679 |
|  | 25 | C | 6.116276 | 6.347232 | 3.345721 | 2.303311 | 2.308535 |
|  | 26 | H | 5.972355 | 6.582402 | 4.356665 | 3.347498 | 3.352497 |
|  | 27 | C | 5.742140 | 5.646562 | 2.240441 | 1.427836 | 2.296574 |
|  | 28 | C | 4.922093 | 3.717125 | 3.103838 | 3.099804 | 3.563559 |
|  | 29 | C | 6.234579 | 5.725676 | 4.314616 | 3.725395 | 3.121992 |
|  | 30 | O | 7.047516 | 6.484099 | 5.279503 | 4.745290 | 3.971392 |
|  | 31 | O | 5.830857 | 4.285691 | 3.136062 | 3.460516 | 3.914455 |
|  |    |   | 21       | 22       | 23       | 24       | 25       |
|  | 21 | H | 0.000000 |          |          |          |          |
|  | 22 | H | 4.348362 | 0.000000 |          |          |          |
|  | 23 | C | 3.333387 | 2.245974 | 0.000000 |          |          |
|  | 24 | H | 4.343055 | 2.703203 | 1.079252 | 0.000000 |          |

|                                                                                                                                                                                                                                                                                                                                                                                                                                                                                                                                                                                                                                                                                       |                                                                                                                                                                                                                                                                                                                                                                                                                                                                                                                                                                                                                                                                                                                                                                                                                                                                                                                                                                                                                                                                                                                                                                                                                                                                                                                                                                                                                                                                                                                                                                                                                                                                                                                                                                                                                                                                      |
|---------------------------------------------------------------------------------------------------------------------------------------------------------------------------------------------------------------------------------------------------------------------------------------------------------------------------------------------------------------------------------------------------------------------------------------------------------------------------------------------------------------------------------------------------------------------------------------------------------------------------------------------------------------------------------------|----------------------------------------------------------------------------------------------------------------------------------------------------------------------------------------------------------------------------------------------------------------------------------------------------------------------------------------------------------------------------------------------------------------------------------------------------------------------------------------------------------------------------------------------------------------------------------------------------------------------------------------------------------------------------------------------------------------------------------------------------------------------------------------------------------------------------------------------------------------------------------------------------------------------------------------------------------------------------------------------------------------------------------------------------------------------------------------------------------------------------------------------------------------------------------------------------------------------------------------------------------------------------------------------------------------------------------------------------------------------------------------------------------------------------------------------------------------------------------------------------------------------------------------------------------------------------------------------------------------------------------------------------------------------------------------------------------------------------------------------------------------------------------------------------------------------------------------------------------------------|
|                                                                                                                                                                                                                                                                                                                                                                                                                                                                                                                                                                                                                                                                                       | 25 C 2.226489 3.350691 1.419022 2.230876 0.000000<br>26 H 2.684733 4.361447 2.231166 2.687195 1.079409<br>27 C 1.078825 3.340992 2.290610 3.333639 1.415419<br>28 C 3.810798 3.958317 4.131640 4.907120 4.112932<br>29 C 4.847321 3.304352 3.094498 3.279986 3.730579<br>30 O 5.991289 3.904196 3.949390 3.886812 4.755985<br>31 O 4.534852 4.046062 4.792589 5.563737 4.954620<br>26 27 28 29 30<br>26 H 0.000000<br>27 C 2.229702 0.000000<br>28 C 4.845495 3.482959 0.000000<br>29 C 4.321862 4.048834 2.699684 0.000000<br>30 O 5.295514 5.165313 3.572023 1.149345 0.000000<br>31 O 5.799638 4.194164 1.173885 3.333341 4.000314<br>31<br>31 O 0.000000                                                                                                                                                                                                                                                                                                                                                                                                                                                                                                                                                                                                                                                                                                                                                                                                                                                                                                                                                                                                                                                                                                                                                                                                         |
| 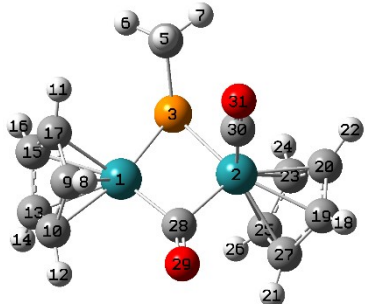 <p>2S -1184.115889 3.72 C1<br/>WBI 0.36</p> <p>Charges and spin densities</p> <p>1</p> <p>1 Ru 0.444270<br/>           2 Ru 0.261536<br/>           3 P -0.224793<br/>           4 C -0.012177<br/>           9 C -0.019293<br/>           10 C 0.026017<br/>           13 C -0.003941<br/>           15 C -0.026614<br/>           17 C -0.018848<br/>           19 C -0.014979<br/>           20 C -0.032544<br/>           23 C 0.027586<br/>           25 C 0.000346<br/>           27 C 0.023948<br/>           28 C -0.056663<br/>           29 O -0.225802<br/>           30 C 0.001945</p> | <p>1 2 3 4 5</p> <p>1 Ru 0.000000<br/>           2 Ru 2.730863 0.000000<br/>           3 P 2.259243 2.336627 0.000000<br/>           4 C 3.465275 3.597498 1.852252 0.000000<br/>           5 H 3.534628 3.682198 2.491565 1.090272 0.000000<br/>           6 H 3.793320 4.501570 2.429828 1.093253 1.780309<br/>           7 H 4.389441 3.940420 2.441560 1.092444 1.776554<br/>           8 H 2.869775 4.529640 4.659463 5.002049 4.418331<br/>           9 C 2.138835 4.354327 4.099840 4.614736 4.239432<br/>           10 C 2.244884 4.645566 4.475530 5.418418 5.271299<br/>           11 H 2.870606 4.822772 3.638205 3.268193 2.850333<br/>           12 H 2.970133 4.978305 5.221582 6.308395 6.138048<br/>           13 C 2.207853 4.862752 4.096516 5.105617 5.214495<br/>           14 H 2.940624 5.388369 4.621853 5.815300 6.066352<br/>           15 C 2.194792 4.842173 3.518361 4.088424 4.207897<br/>           16 H 2.930781 5.364423 3.633451 4.043576 4.365928<br/>           17 C 2.139883 4.519541 3.506438 3.695301 3.449666<br/>           18 H 5.452604 2.955844 5.218453 6.185030 6.074795<br/>           19 C 4.822868 2.244369 4.416166 5.568291 5.625719<br/>           20 C 4.879614 2.219609 3.803247 4.794648 5.029425<br/>           21 H 4.503119 2.980702 4.965433 6.519648 6.618303<br/>           22 H 5.576367 2.946791 4.239964 4.844523 5.030342<br/>           23 C 4.436248 2.283932 3.236038 4.578151 5.075146<br/>           24 H 4.771934 2.997645 3.165475 4.367726 5.054972<br/>           25 C 4.012933 2.293219 3.547764 5.203659 5.630470<br/>           26 H 4.030500 3.031452 3.773611 5.564843 6.094835<br/>           27 C 4.285193 2.270036 4.265944 5.771976 5.947107<br/>           28 C 1.980621 2.048128 3.327343 4.589088 4.439491<br/>           29 O 2.976460 2.996177 4.502546 5.700238 5.443759</p> |

|      |           |      |          |          |          |          |          |
|------|-----------|------|----------|----------|----------|----------|----------|
| 31 O | -0.149994 | 30 C | 3.340401 | 1.838709 | 3.025585 | 3.323747 | 2.878020 |
|      |           | 31 O | 4.115529 | 2.986552 | 3.862487 | 3.651060 | 2.907475 |
|      |           |      | 6        | 7        | 8        | 9        | 10       |
|      |           | 6 H  | 0.000000 |          |          |          |          |
|      |           | 7 H  | 1.764323 | 0.000000 |          |          |          |
|      |           | 8 H  | 5.294613 | 5.984618 | 0.000000 |          |          |
|      |           | 9 C  | 4.773697 | 5.657100 | 1.079396 | 0.000000 |          |
|      |           | 10 C | 5.530060 | 6.441727 | 2.235890 | 1.424027 | 0.000000 |
|      |           | 11 H | 3.091972 | 4.328463 | 2.697231 | 2.245677 | 3.359065 |
|      |           | 12 H | 6.512163 | 7.290529 | 2.692297 | 2.234718 | 1.078677 |
|      |           | 13 C | 5.010284 | 6.119836 | 3.327587 | 2.284051 | 1.410105 |
|      |           | 14 H | 5.676869 | 6.769021 | 4.338003 | 3.327790 | 2.220752 |
|      |           | 15 C | 3.803408 | 5.138971 | 3.345358 | 2.303895 | 2.313272 |
|      |           | 16 H | 3.511935 | 5.020581 | 4.360270 | 3.350798 | 3.351651 |
|      |           | 17 C | 3.597721 | 4.785633 | 2.245717 | 1.437796 | 2.318969 |
|      |           | 18 H | 7.213699 | 6.226528 | 6.444374 | 6.630515 | 6.873275 |
|      |           | 19 C | 6.553784 | 5.612859 | 6.267604 | 6.279735 | 6.426481 |
|      |           | 20 C | 5.780234 | 4.619837 | 6.677195 | 6.569247 | 6.822213 |
|      |           | 21 H | 7.326624 | 6.859515 | 5.940529 | 5.834035 | 5.514309 |
|      |           | 22 H | 5.867976 | 4.459816 | 7.212850 | 7.173378 | 7.587136 |
|      |           | 23 C | 5.400209 | 4.480436 | 6.731160 | 6.398019 | 6.442710 |
|      |           | 24 H | 5.074611 | 4.124155 | 7.254812 | 6.820468 | 6.883101 |
|      |           | 25 C | 5.944097 | 5.370391 | 6.308913 | 5.932786 | 5.710408 |
|      |           | 26 H | 6.147132 | 5.821289 | 6.524127 | 6.000399 | 5.552217 |
|      |           | 27 C | 6.625612 | 5.993479 | 6.010652 | 5.859237 | 5.705157 |
|      |           | 28 C | 5.257137 | 5.297650 | 3.056936 | 2.931605 | 2.979104 |
|      |           | 29 O | 6.368938 | 6.405923 | 3.201522 | 3.320832 | 3.219001 |
|      |           | 30 C | 4.325234 | 3.662604 | 4.022444 | 4.204131 | 5.002927 |
|      |           | 31 O | 4.606322 | 3.943631 | 4.116808 | 4.511796 | 5.537933 |
|      |           |      | 11       | 12       | 13       | 14       | 15       |
|      |           | 11 H | 0.000000 |          |          |          |          |
|      |           | 12 H | 4.367317 | 0.000000 |          |          |          |
|      |           | 13 C | 3.345980 | 2.225657 | 0.000000 |          |          |
|      |           | 14 H | 4.354321 | 2.679209 | 1.080051 | 0.000000 |          |
|      |           | 15 C | 2.235993 | 3.356229 | 1.432182 | 2.237859 | 0.000000 |
|      |           | 16 H | 2.705247 | 4.360064 | 2.241108 | 2.688338 | 1.078809 |
|      |           | 17 C | 1.079389 | 3.361157 | 2.298323 | 3.339126 | 1.416799 |
|      |           | 18 H | 7.433224 | 6.835936 | 7.420345 | 7.877155 | 7.636872 |
|      |           | 19 C | 6.997537 | 6.467539 | 6.794609 | 7.177928 | 6.995035 |
|      |           | 20 C | 6.842770 | 7.067705 | 6.954055 | 7.340941 | 6.910319 |
|      |           | 21 H | 7.143919 | 5.254019 | 5.942390 | 6.104130 | 6.583556 |
|      |           | 22 H | 7.193660 | 7.903070 | 7.721242 | 8.179168 | 7.520999 |
|      |           | 23 C | 6.646695 | 6.738186 | 6.317393 | 6.543118 | 6.313907 |
|      |           | 24 H | 6.774722 | 7.296532 | 6.555942 | 6.734163 | 6.396263 |
|      |           | 25 C | 6.622215 | 5.831933 | 5.650198 | 5.752659 | 5.955914 |
|      |           | 26 H | 6.760772 | 5.651055 | 5.307074 | 5.216894 | 5.740447 |

|  |    |   |          |          |          |          |          |
|--|----|---|----------|----------|----------|----------|----------|
|  | 27 | C | 6.846474 | 5.645297 | 5.989334 | 6.210044 | 6.415179 |
|  | 28 | C | 4.299295 | 3.072281 | 3.632966 | 4.224912 | 4.048535 |
|  | 29 | O | 5.061742 | 2.930420 | 4.173661 | 4.708373 | 4.821103 |
|  | 30 | C | 4.327598 | 5.430002 | 5.476095 | 6.263109 | 5.174838 |
|  | 31 | O | 4.404045 | 5.991677 | 6.119169 | 7.006485 | 5.688834 |
|  |    |   | 16       | 17       | 18       | 19       | 20       |
|  | 16 | H | 0.000000 |          |          |          |          |
|  | 17 | C | 2.234817 | 0.000000 |          |          |          |
|  | 18 | H | 8.266019 | 7.161405 | 0.000000 |          |          |
|  | 19 | C | 7.541569 | 6.678563 | 1.079052 | 0.000000 |          |
|  | 20 | C | 7.275679 | 6.659982 | 2.245056 | 1.432771 | 0.000000 |
|  | 21 | H | 7.243998 | 6.514209 | 2.676187 | 2.219356 | 3.338143 |
|  | 22 | H | 7.833609 | 7.163631 | 2.704115 | 2.244227 | 1.079173 |
|  | 23 | C | 6.551215 | 6.351296 | 3.349826 | 2.306978 | 1.421002 |
|  | 24 | H | 6.455154 | 6.552494 | 4.360070 | 3.350200 | 2.231838 |
|  | 25 | C | 6.318516 | 6.112571 | 3.345941 | 2.301858 | 2.294851 |
|  | 26 | H | 6.030857 | 6.138904 | 4.353395 | 3.342871 | 3.338113 |
|  | 27 | C | 6.973940 | 6.329697 | 2.223351 | 1.408614 | 2.294074 |
|  | 28 | C | 4.889328 | 3.670009 | 3.895805 | 3.491062 | 4.078890 |
|  | 29 | O | 5.757554 | 4.384589 | 4.004176 | 3.844054 | 4.750555 |
|  | 30 | C | 5.769782 | 4.363164 | 3.377142 | 3.193969 | 3.171676 |
|  | 31 | O | 6.294475 | 4.654556 | 4.056344 | 4.101110 | 4.081987 |
|  |    |   | 21       | 22       | 23       | 24       | 25       |
|  | 21 | H | 0.000000 |          |          |          |          |
|  | 22 | H | 4.347366 | 0.000000 |          |          |          |
|  | 23 | C | 3.339566 | 2.232617 | 0.000000 |          |          |
|  | 24 | H | 4.349542 | 2.687999 | 1.078864 | 0.000000 |          |
|  | 25 | C | 2.240061 | 3.336822 | 1.412904 | 2.224274 | 0.000000 |
|  | 26 | H | 2.697628 | 4.346521 | 2.226111 | 2.680813 | 1.078933 |
|  | 27 | C | 1.079472 | 3.336328 | 2.297458 | 3.340992 | 1.429673 |
|  | 28 | C | 2.957451 | 4.880135 | 4.042582 | 4.783805 | 3.378263 |
|  | 29 | O | 2.903784 | 5.565365 | 4.865623 | 5.718751 | 4.040366 |
|  | 30 | C | 4.331467 | 3.374241 | 3.782402 | 4.361973 | 4.083802 |
|  | 31 | O | 5.322877 | 4.057638 | 4.836751 | 5.358602 | 5.217567 |
|  |    |   | 26       | 27       | 28       | 29       | 30       |
|  | 26 | H | 0.000000 |          |          |          |          |
|  | 27 | C | 2.241542 | 0.000000 |          |          |          |
|  | 28 | C | 3.703696 | 2.977975 | 0.000000 |          |          |
|  | 29 | O | 4.351742 | 3.293369 | 1.175622 | 0.000000 |          |
|  | 30 | C | 4.870120 | 3.760038 | 2.718952 | 3.448524 | 0.000000 |
|  | 31 | O | 6.017912 | 4.811676 | 3.582088 | 4.141080 | 1.147860 |
|  |    |   | 31       |          |          |          |          |
|  | 31 | O | 0.000000 |          |          |          |          |

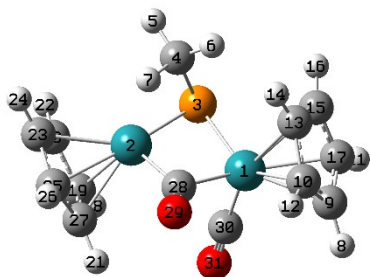

3S -1184.115276 4.11 C1  
WBI 0.33

Charges and spin densities

1

1 Ru 0.335759  
2 Ru 0.206895  
3 P -0.212968  
4 C 0.150783  
9 C -0.042057  
10 C 0.045573  
13 C -0.052904  
15 C -0.002162  
17 C -0.024252  
19 C 0.006554  
20 C -0.023467  
23 C 0.006847  
25 C 0.030416  
27 C -0.038347  
28 C 0.003302  
29 O -0.229667  
30 C 0.002665  
31 O -0.162967

|      | 1        | 2        | 3        | 4        | 5        |
|------|----------|----------|----------|----------|----------|
| 1 Ru | 0.000000 |          |          |          |          |
| 2 Ru | 2.772454 | 0.000000 |          |          |          |
| 3 P  | 2.355187 | 2.287730 | 0.000000 |          |          |
| 4 C  | 3.133396 | 2.352609 | 1.853888 | 0.000000 |          |
| 5 H  | 4.180690 | 3.011868 | 2.489359 | 1.090132 | 0.000000 |
| 6 H  | 3.159823 | 3.133440 | 2.507482 | 1.089553 | 1.797133 |
| 7 H  | 3.274079 | 1.835837 | 2.574663 | 1.184660 | 1.805409 |
| 8 H  | 2.947887 | 5.568351 | 5.123568 | 5.953991 | 7.008907 |
| 9 C  | 2.240432 | 4.952364 | 4.376433 | 5.031207 | 6.081289 |
| 10 C | 2.272616 | 4.547273 | 4.405181 | 4.537665 | 5.606030 |
| 11 H | 2.955766 | 5.519927 | 4.001884 | 5.081662 | 5.932691 |
| 12 H | 2.979497 | 4.846617 | 5.155751 | 5.131260 | 6.196660 |
| 13 C | 2.294322 | 4.236531 | 3.758015 | 3.536633 | 4.532475 |
| 14 H | 3.043640 | 4.334473 | 4.119608 | 3.377720 | 4.272509 |
| 15 C | 2.282461 | 4.496157 | 3.270018 | 3.515691 | 4.418988 |
| 16 H | 3.010362 | 4.783224 | 3.204065 | 3.311318 | 4.015766 |
| 17 C | 2.232048 | 4.910476 | 3.691672 | 4.487171 | 5.432511 |
| 18 H | 4.385536 | 2.907027 | 3.603038 | 4.715917 | 5.072917 |
| 19 C | 4.233511 | 2.174826 | 3.496748 | 4.202005 | 4.551246 |
| 20 C | 4.785925 | 2.212058 | 3.536425 | 3.723594 | 3.766681 |
| 21 H | 4.140893 | 2.888054 | 4.636245 | 5.216057 | 5.883736 |
| 22 H | 5.346997 | 2.951467 | 3.660924 | 3.863407 | 3.636646 |
| 23 C | 4.988060 | 2.227942 | 4.150922 | 3.771911 | 3.867552 |
| 24 H | 5.675977 | 2.965717 | 4.711844 | 3.935851 | 3.814925 |
| 25 C | 4.641653 | 2.241747 | 4.492366 | 4.302919 | 4.709160 |
| 26 H | 5.067001 | 2.971094 | 5.256936 | 4.846735 | 5.304641 |
| 27 C | 4.101285 | 2.160939 | 4.092428 | 4.504018 | 5.041732 |
| 28 C | 2.072019 | 1.980955 | 3.310914 | 3.305789 | 4.279325 |
| 29 O | 3.006550 | 2.976242 | 4.479603 | 4.295326 | 5.236703 |
| 30 C | 1.834068 | 3.183448 | 2.994946 | 4.361117 | 5.265708 |
| 31 O | 2.984106 | 3.906876 | 3.827604 | 5.326291 | 6.147126 |
|      | 6        | 7        | 8        | 9        | 10       |
| 6 H  | 0.000000 |          |          |          |          |
| 7 H  | 1.721884 | 0.000000 |          |          |          |
| 8 H  | 5.679484 | 6.075093 | 0.000000 |          |          |
| 9 C  | 4.667079 | 5.212121 | 1.079372 | 0.000000 |          |
| 10 C | 4.036884 | 4.497610 | 2.223291 | 1.409231 | 0.000000 |
| 11 H | 4.805459 | 5.718680 | 2.699196 | 2.244042 | 3.341911 |
| 12 H | 4.661931 | 4.853470 | 2.681291 | 2.223367 | 1.079118 |
| 13 C | 2.825858 | 3.691025 | 3.341436 | 2.296786 | 1.428885 |
| 14 H | 2.504494 | 3.384154 | 4.347835 | 3.337122 | 2.237024 |
| 15 C | 2.906381 | 4.075580 | 3.342310 | 2.299887 | 2.298670 |
| 16 H | 2.653935 | 4.118160 | 4.350835 | 3.342536 | 3.344240 |
| 17 C | 4.109167 | 4.985261 | 2.239557 | 1.430605 | 2.299911 |
| 18 H | 5.648081 | 4.603696 | 6.608617 | 6.359073 | 6.510864 |



|  |    |   |          |          |          |          |          |
|--|----|---|----------|----------|----------|----------|----------|
|  | 19 | C | 5.145317 | 3.867618 | 6.670669 | 6.322200 | 6.237413 |
|  | 20 | C | 4.758364 | 3.355853 | 7.520918 | 7.000856 | 6.734700 |
|  | 21 | H | 5.872863 | 4.589276 | 5.868429 | 5.758736 | 5.578973 |
|  | 22 | H | 4.948393 | 3.753498 | 8.152384 | 7.580940 | 7.383331 |
|  | 23 | C | 4.660957 | 2.995488 | 7.686228 | 7.121929 | 6.585428 |
|  | 24 | H | 4.755462 | 3.111818 | 8.431321 | 7.782409 | 7.116277 |
|  | 25 | C | 5.033782 | 3.387228 | 7.014736 | 6.584033 | 6.020829 |
|  | 26 | H | 5.413038 | 3.785207 | 7.213659 | 6.802380 | 6.071796 |
|  | 27 | C | 5.276349 | 3.857283 | 6.293623 | 6.009833 | 5.738264 |
|  | 28 | C | 3.498351 | 2.678457 | 4.208887 | 3.670503 | 3.006840 |
|  | 29 | O | 4.355244 | 3.506657 | 4.458319 | 4.057486 | 3.191358 |
|  | 30 | C | 4.716373 | 4.446366 | 3.238680 | 3.113334 | 3.645568 |
|  | 31 | O | 5.785359 | 5.389657 | 3.857487 | 3.990559 | 4.661276 |
|  |    |   | 11       | 12       | 13       | 14       | 15       |
|  | 11 | H | 0.000000 |          |          |          |          |
|  | 12 | H | 4.353252 | 0.000000 |          |          |          |
|  | 13 | C | 3.340074 | 2.238462 | 0.000000 |          |          |
|  | 14 | H | 4.351654 | 2.689811 | 1.079381 | 0.000000 |          |
|  | 15 | C | 2.233244 | 3.340197 | 1.414458 | 2.231371 | 0.000000 |
|  | 16 | H | 2.682162 | 4.352765 | 2.229929 | 2.694042 | 1.079669 |
|  | 17 | C | 1.078828 | 3.344038 | 2.297917 | 3.342496 | 1.420170 |
|  | 18 | H | 6.446428 | 6.863232 | 6.515947 | 6.919580 | 6.374753 |
|  | 19 | C | 6.661519 | 6.495447 | 6.175199 | 6.432147 | 6.231456 |
|  | 20 | C | 7.247011 | 7.022558 | 6.393701 | 6.445586 | 6.474592 |
|  | 21 | H | 6.763962 | 5.505648 | 5.983116 | 6.298622 | 6.386676 |
|  | 22 | H | 7.539469 | 7.779929 | 6.893774 | 6.932611 | 6.806832 |
|  | 23 | C | 7.730963 | 6.693808 | 6.251127 | 6.111647 | 6.628852 |
|  | 24 | H | 8.387068 | 7.205697 | 6.631498 | 6.324821 | 7.069304 |
|  | 25 | C | 7.533827 | 5.952993 | 5.979411 | 5.923532 | 6.532610 |
|  | 26 | H | 8.018051 | 5.821797 | 6.116433 | 5.955775 | 6.876135 |
|  | 27 | C | 6.827562 | 5.768788 | 5.881831 | 6.083428 | 6.238081 |
|  | 28 | C | 4.987544 | 3.025240 | 3.166568 | 3.361625 | 3.889510 |
|  | 29 | O | 5.746456 | 2.794797 | 3.630406 | 3.703494 | 4.621743 |
|  | 30 | C | 3.517364 | 4.146537 | 4.064831 | 4.857929 | 3.864417 |
|  | 31 | O | 4.236514 | 5.074516 | 5.193141 | 6.000883 | 4.939864 |
|  |    |   | 16       | 17       | 18       | 19       | 20       |
|  | 16 | H | 0.000000 |          |          |          |          |
|  | 17 | C | 2.227097 | 0.000000 |          |          |          |
|  | 18 | H | 6.639980 | 6.253472 | 0.000000 |          |          |
|  | 19 | C | 6.510033 | 6.301335 | 1.078972 | 0.000000 |          |
|  | 20 | C | 6.571752 | 6.831584 | 2.239679 | 1.421942 | 0.000000 |
|  | 21 | H | 6.992907 | 6.243284 | 2.688371 | 2.235021 | 3.339617 |
|  | 22 | H | 6.740354 | 7.222615 | 2.702884 | 2.235938 | 1.079271 |
|  | 23 | C | 6.803701 | 7.134851 | 3.349127 | 2.303250 | 1.428039 |
|  | 24 | H | 7.147824 | 7.745671 | 4.358409 | 3.345252 | 2.235824 |
|  | 25 | C | 6.925857 | 6.868652 | 3.359818 | 2.318600 | 2.308243 |

|                                                                                                                                                                                                                                                                                           |                                                                                                                                                                                                                                                                                                                                                                                                                                                                                                                                                                                                                                                                                                                                                                                                                                                                                                                                                                                                                                                                                                                                                                |
|-------------------------------------------------------------------------------------------------------------------------------------------------------------------------------------------------------------------------------------------------------------------------------------------|----------------------------------------------------------------------------------------------------------------------------------------------------------------------------------------------------------------------------------------------------------------------------------------------------------------------------------------------------------------------------------------------------------------------------------------------------------------------------------------------------------------------------------------------------------------------------------------------------------------------------------------------------------------------------------------------------------------------------------------------------------------------------------------------------------------------------------------------------------------------------------------------------------------------------------------------------------------------------------------------------------------------------------------------------------------------------------------------------------------------------------------------------------------|
|                                                                                                                                                                                                                                                                                           | 26 H 7.347202 7.252940 4.367730 3.360404 3.352030<br>27 C 6.703305 6.296679 2.238281 1.427556 2.297263<br>28 C 4.567979 4.145158 4.201933 3.610948 4.055608<br>29 O 5.400005 4.832547 5.042586 4.390790 4.857688<br>30 C 4.519095 3.252888 3.390882 3.610346 4.624984<br>31 O 5.562404 4.172777 3.204538 3.689861 4.913961<br>21    22    23    24    25<br>21 H 0.000000<br>22 H 4.352093 0.000000<br>23 C 3.330733 2.239317 0.000000<br>24 H 4.342555 2.689659 1.080222 0.000000<br>25 C 2.239822 3.348433 1.410722 2.221316 0.000000<br>26 H 2.698159 4.358373 2.227722 2.681838 1.078765<br>27 C 1.079560 3.342577 2.287428 3.332365 1.429121<br>28 C 2.955068 4.906571 3.718763 4.368577 3.015981<br>29 O 3.198480 5.795551 4.266713 4.835836 3.293662<br>30 C 3.368445 5.224330 5.142213 6.062810 4.646486<br>31 O 3.359655 5.496960 5.580522 6.585428 5.028844<br>26    27    28    29    30<br>26 H 0.000000<br>27 C 2.241226 0.000000<br>28 C 3.157740 2.881233 0.000000<br>29 O 3.050163 3.348155 1.174217 0.000000<br>30 C 5.230080 3.600964 2.855908 3.678759 0.000000<br>31 O 5.663438 3.764744 3.752756 4.454642 1.150275<br>31<br>31 O 0.000000 |
| 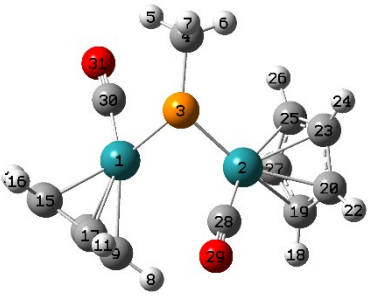 <p>4S -1184.111335 6.58 C1<br/>WBI 0.38</p> <p>Charges and spin densities</p> <p>1</p> <p>1 Ru 0.510098<br/>2 Ru 0.475170<br/>3 P -0.244217<br/>4 C 0.028561<br/>9 C -0.004869<br/>10 C -0.009096</p> | <p>1 2 3 4 5</p> <p>1 Ru 0.000000<br/>2 Ru 3.021677 0.000000<br/>3 P 2.187098 2.179435 0.000000<br/>4 C 3.611967 3.575996 1.828367 0.000000<br/>5 H 3.643575 4.319023 2.445231 1.090798 0.000000<br/>6 H 4.263883 3.575858 2.437192 1.091497 1.793622<br/>7 H 4.302820 4.182755 2.399935 1.093899 1.772736<br/>8 H 3.010257 3.560698 4.354020 6.132996 6.462256<br/>9 C 2.276268 3.767610 3.998774 5.707070 5.888854<br/>10 C 2.239225 4.372071 4.342024 5.802261 5.744118<br/>11 H 2.985791 4.293291 3.948216 5.605001 5.907346<br/>12 H 2.983312 4.722313 4.967600 6.333056 6.243447<br/>13 C 2.203731 5.034280 4.349076 5.583129 5.330444<br/>14 H 2.915247 5.822367 4.959501 5.924195 5.478960<br/>15 C 2.200952 4.906245 3.986476 5.312548 5.191901<br/>16 H 2.931240 5.628626 4.371718 5.464972 5.254723<br/>17 C 2.259321 4.151736 3.770060 5.413108 5.572938<br/>18 H 5.054642 2.971733 5.079367 6.427565 7.064959</p>                                                                                                                                                                                                                                 |

|      |           |      |          |          |          |          |          |
|------|-----------|------|----------|----------|----------|----------|----------|
| 13 C | -0.040437 |      |          |          |          |          |          |
| 15 C | -0.010274 |      |          |          |          |          |          |
| 17 C | -0.034356 |      |          |          |          |          |          |
| 19 C | -0.029149 |      |          |          |          |          |          |
| 20 C | -0.031735 |      |          |          |          |          |          |
| 23 C | -0.011438 |      |          |          |          |          |          |
| 25 C | -0.046671 |      |          |          |          |          |          |
| 27 C | -0.000713 |      |          |          |          |          |          |
| 28 C | -0.107699 |      |          |          |          |          |          |
| 29 O | -0.162574 |      |          |          |          |          |          |
| 30 C | -0.112749 |      |          |          |          |          |          |
| 31 O | -0.167850 |      |          |          |          |          |          |
|      |           | 19 C | 4.687924 | 2.234334 | 4.352334 | 5.530914 | 6.209848 |
|      |           | 20 C | 5.168436 | 2.201967 | 4.224406 | 5.209959 | 6.072121 |
|      |           | 21 H | 4.104004 | 2.952871 | 4.299721 | 5.205559 | 5.524084 |
|      |           | 22 H | 5.886482 | 2.936924 | 4.883877 | 5.909577 | 6.845400 |
|      |           | 23 C | 5.039018 | 2.212154 | 3.692301 | 4.221710 | 5.090896 |
|      |           | 24 H | 5.664824 | 2.946284 | 3.980376 | 4.155991 | 5.110729 |
|      |           | 25 C | 4.434665 | 2.228536 | 3.458004 | 3.916016 | 4.544581 |
|      |           | 26 H | 4.610653 | 2.972893 | 3.563529 | 3.547459 | 4.020307 |
|      |           | 27 C | 4.180183 | 2.230006 | 3.893190 | 4.812111 | 5.329441 |
|      |           | 28 C | 3.322249 | 1.851880 | 2.955176 | 4.654167 | 5.397455 |
|      |           | 29 O | 4.019822 | 3.000540 | 3.873415 | 5.573826 | 6.300621 |
|      |           | 30 C | 1.832377 | 3.910034 | 2.732237 | 3.229887 | 2.795049 |
|      |           | 31 O | 2.982523 | 4.806421 | 3.601045 | 3.572200 | 2.865971 |
|      |           |      | 6        | 7        | 8        | 9        | 10       |
|      |           | 6 H  | 0.000000 |          |          |          |          |
|      |           | 7 H  | 1.768642 | 0.000000 |          |          |          |
|      |           | 8 H  | 6.562205 | 6.720851 | 0.000000 |          |          |
|      |           | 9 C  | 6.267071 | 6.297658 | 1.078035 | 0.000000 |          |
|      |           | 10 C | 6.343595 | 6.540058 | 2.230326 | 1.422736 | 0.000000 |
|      |           | 11 H | 6.377136 | 5.814938 | 2.671805 | 2.221959 | 3.343005 |
|      |           | 12 H | 6.737007 | 7.175536 | 2.690108 | 2.236970 | 1.078209 |
|      |           | 13 C | 6.303893 | 6.226309 | 3.335525 | 2.293434 | 1.424836 |
|      |           | 14 H | 6.640310 | 6.604315 | 4.346290 | 3.337359 | 2.234826 |
|      |           | 15 C | 6.170887 | 5.733582 | 3.341550 | 2.300016 | 2.310058 |
|      |           | 16 H | 6.430079 | 5.730433 | 4.350651 | 3.342391 | 3.352283 |
|      |           | 17 C | 6.165817 | 5.802299 | 2.220613 | 1.411449 | 2.301826 |
|      |           | 18 H | 6.221440 | 7.116380 | 3.775527 | 4.576443 | 5.147307 |
|      |           | 19 C | 5.232712 | 6.226192 | 4.090792 | 4.711867 | 5.216503 |
|      |           | 20 C | 4.822652 | 5.712354 | 4.897960 | 5.465580 | 6.138262 |
|      |           | 21 H | 4.907859 | 6.167905 | 4.314670 | 4.569063 | 4.426359 |
|      |           | 22 H | 5.567975 | 6.260348 | 5.299780 | 5.965742 | 6.813681 |
|      |           | 23 C | 3.635802 | 4.750668 | 5.574787 | 5.910391 | 6.389399 |
|      |           | 24 H | 3.465905 | 4.486933 | 6.435359 | 6.713835 | 7.231827 |
|      |           | 25 C | 3.316986 | 4.719930 | 5.298089 | 5.497865 | 5.670245 |
|      |           | 26 H | 2.797983 | 4.429831 | 5.977750 | 6.014871 | 5.988949 |
|      |           | 27 C | 4.439684 | 5.673936 | 4.372388 | 4.718385 | 4.864858 |
|      |           | 28 C | 4.952339 | 4.970372 | 2.816787 | 3.192658 | 4.315770 |
|      |           | 29 O | 5.964301 | 5.754390 | 2.933379 | 3.392541 | 4.717273 |
|      |           | 30 C | 3.757240 | 4.139879 | 4.603994 | 3.882726 | 3.253755 |
|      |           | 31 O | 3.961418 | 4.508040 | 5.671808 | 4.953681 | 4.147606 |
|      |           |      | 11       | 12       | 13       | 14       | 15       |
|      |           | 11 H | 0.000000 |          |          |          |          |
|      |           | 12 H | 4.350240 | 0.000000 |          |          |          |
|      |           | 13 C | 3.340810 | 2.238947 | 0.000000 |          |          |
|      |           | 14 H | 4.352020 | 2.694884 | 1.079699 | 0.000000 |          |
|      |           | 15 C | 2.241294 | 3.352047 | 1.420802 | 2.230202 | 0.000000 |

|  |      |          |          |          |          |          |
|--|------|----------|----------|----------|----------|----------|
|  | 16 H | 2.704256 | 4.360974 | 2.234201 | 2.687566 | 1.078558 |
|  | 17 C | 1.078811 | 3.343158 | 2.297133 | 3.341078 | 1.429454 |
|  | 18 H | 5.819598 | 5.003343 | 6.365873 | 7.171685 | 6.593028 |
|  | 19 C | 5.809117 | 5.153270 | 6.288291 | 7.049111 | 6.474330 |
|  | 20 C | 6.072200 | 6.258227 | 7.039745 | 7.836436 | 6.986916 |
|  | 21 H | 6.177930 | 4.066090 | 5.420860 | 5.902185 | 6.037325 |
|  | 22 H | 6.322390 | 6.999242 | 7.723097 | 8.590004 | 7.531643 |
|  | 23 C | 6.449061 | 6.535356 | 7.091176 | 7.766006 | 7.062856 |
|  | 24 H | 6.984958 | 7.458463 | 7.805958 | 8.463105 | 7.657831 |
|  | 25 C | 6.414210 | 5.672801 | 6.365408 | 6.907023 | 6.587996 |
|  | 26 H | 6.927972 | 5.971621 | 6.514350 | 6.909490 | 6.811205 |
|  | 27 C | 6.011677 | 4.706685 | 5.812575 | 6.407737 | 6.192627 |
|  | 28 C | 3.060398 | 4.907352 | 4.965891 | 5.950725 | 4.459008 |
|  | 29 O | 2.764469 | 5.390024 | 5.329401 | 6.376507 | 4.632913 |
|  | 30 C | 4.752429 | 3.597961 | 2.934997 | 3.004932 | 3.420722 |
|  | 31 O | 5.872513 | 4.310160 | 3.739611 | 3.501362 | 4.369480 |
|  |      | 16       | 17       | 18       | 19       | 20       |
|  | 16 H | 0.000000 |          |          |          |          |
|  | 17 C | 2.243620 | 0.000000 |          |          |          |
|  | 18 H | 7.556169 | 5.595174 | 0.000000 |          |          |
|  | 19 C | 7.371680 | 5.584852 | 1.078853 | 0.000000 |          |
|  | 20 C | 7.760443 | 6.056478 | 2.242954 | 1.429527 | 0.000000 |
|  | 21 H | 6.955475 | 5.586318 | 2.681417 | 2.225421 | 3.340068 |
|  | 22 H | 8.274315 | 6.470831 | 2.702382 | 2.241408 | 1.079227 |
|  | 23 C | 7.736310 | 6.363244 | 3.351303 | 2.308472 | 1.421358 |
|  | 24 H | 8.224691 | 6.998425 | 4.360075 | 3.350738 | 2.231478 |
|  | 25 C | 7.311151 | 6.094016 | 3.345587 | 2.302812 | 2.298648 |
|  | 26 H | 7.454320 | 6.531671 | 4.351383 | 3.343076 | 3.343275 |
|  | 27 C | 7.063732 | 5.590958 | 2.227153 | 1.414329 | 2.296482 |
|  | 28 C | 5.145124 | 3.309072 | 3.423610 | 3.190393 | 3.096759 |
|  | 29 O | 5.251320 | 3.316668 | 4.071092 | 4.064317 | 3.948883 |
|  | 30 C | 3.881629 | 3.976363 | 5.952547 | 5.408617 | 5.909940 |
|  | 31 O | 4.708024 | 5.076032 | 6.751764 | 6.153638 | 6.659383 |
|  |      | 21       | 22       | 23       | 24       | 25       |
|  | 21 H | 0.000000 |          |          |          |          |
|  | 22 H | 4.350067 | 0.000000 |          |          |          |
|  | 23 C | 3.344304 | 2.231322 | 0.000000 |          |          |
|  | 24 H | 4.356073 | 2.683703 | 1.079162 | 0.000000 |          |
|  | 25 C | 2.234704 | 3.341131 | 1.422426 | 2.237586 | 0.000000 |
|  | 26 H | 2.686375 | 4.352870 | 2.237927 | 2.701721 | 1.079137 |
|  | 27 C | 1.078978 | 3.339433 | 2.302494 | 3.347169 | 1.425431 |
|  | 28 C | 4.368360 | 3.272274 | 3.662756 | 4.228877 | 4.028257 |
|  | 29 O | 5.373520 | 3.865626 | 4.677900 | 5.172942 | 5.150549 |
|  | 30 C | 4.165836 | 6.804328 | 5.402046 | 5.949122 | 4.449859 |
|  | 31 O | 4.636395 | 7.613957 | 5.991220 | 6.477440 | 4.903468 |
|  |      | 26       | 27       | 28       | 29       | 30       |

|                                                                                   |                                                   |
|-----------------------------------------------------------------------------------|---------------------------------------------------|
|                                                                                   | 26 H 0.000000                                     |
|                                                                                   | 27 C 2.234427 0.000000                            |
|                                                                                   | 28 C 4.822138 3.758576 0.000000                   |
|                                                                                   | 29 O 5.968174 4.804877 1.150757 0.000000          |
|                                                                                   | 30 C 4.196824 4.449266 4.836428 5.699435 0.000000 |
|                                                                                   | 31 O 4.414246 5.023313 5.914600 6.819809 1.152575 |
|                                                                                   | 31                                                |
|                                                                                   | 31 O 0.000000                                     |
| 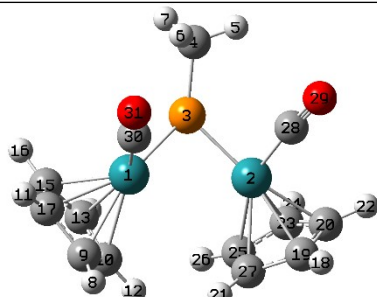 |                                                   |
| 5S. -1184.103865 11.27 Cs<br>WBI 0.38                                             |                                                   |
| Charge and spin density                                                           |                                                   |
| 1                                                                                 |                                                   |
| 1 Ru 0.480085                                                                     | 1 Ru 0.000000                                     |
| 2 Ru 0.523127                                                                     | 2 Ru 3.087916 0.000000                            |
| 3 P -0.243540                                                                     | 3 P 2.182074 2.166979 0.000000                    |
| 4 C 0.053910                                                                      | 4 C 3.587529 3.586252 1.823184 0.000000           |
| 9 C -0.029350                                                                     | 5 H 4.435586 3.664065 2.444700 1.089939 0.000000  |
| 10 C -0.000524                                                                    | 6 H 3.639578 4.110371 2.423458 1.092612 1.791533  |
| 13 C -0.060087                                                                    | 7 H 4.012079 4.367840 2.396794 1.093391 1.779415  |
| 15 C -0.031236                                                                    | 8 H 3.018605 5.059568 5.091650 6.510586 7.294045  |
| 17 C -0.046421                                                                    | 9 C 2.267153 4.646545 4.390823 5.848251 6.689039  |
| 19 C -0.011739                                                                    | 10 C 2.298519 4.050382 4.005706 5.684285 6.441475 |
| 20 C -0.036770                                                                    | 11 H 2.900131 5.933117 4.892889 5.782507 6.793652 |
| 23 C -0.013166                                                                    | 12 H 3.049871 3.947972 4.434746 6.216274 6.843785 |
| 25 C -0.056051                                                                    | 13 C 2.267127 4.286869 3.634663 5.170830 6.007954 |
| 27 C -0.010387                                                                    | 14 H 2.999587 4.391625 3.773120 5.289767 6.041610 |
| 28 C -0.106155                                                                    | 15 C 2.185887 4.969543 3.803524 4.981171 5.968416 |
| 29 O -0.152627                                                                    | 16 H 2.913342 5.621134 4.119154 4.982989 6.015550 |
| 30 C -0.095543                                                                    | 17 C 2.192989 5.170738 4.277747 5.438049 6.413749 |
| 31 O -0.163526                                                                    | 18 H 5.126882 2.978195 4.991743 6.213069 6.134414 |
|                                                                                   | 19 C 4.618932 2.246956 4.367486 5.745618 5.705673 |
|                                                                                   | 20 C 5.140140 2.218912 4.312752 5.542446 5.313391 |
|                                                                                   | 21 H 3.640584 2.987354 4.440856 6.127584 6.471823 |
|                                                                                   | 22 H 5.993667 2.939677 4.903230 5.855839 5.429457 |
|                                                                                   | 23 C 4.764001 2.217783 3.951091 5.368450 5.281949 |
|                                                                                   | 24 H 5.374591 2.939758 4.290157 5.543455 5.374224 |
|                                                                                   | 25 C 3.913117 2.246558 3.775514 5.475862 5.662840 |
|                                                                                   | 26 H 3.869825 2.983170 3.983151 5.741459 6.065248 |
|                                                                                   | 27 C 3.805752 2.259081 4.045388 5.702105 5.904607 |
|                                                                                   | 28 C 4.083543 1.838649 2.712751 3.175194 2.850796 |
|                                                                                   | 29 O 5.012767 2.986015 3.588517 3.518512 2.950285 |
|                                                                                   | 30 C 1.831391 3.881831 2.795374 3.356993 4.200685 |
|                                                                                   | 31 O 2.981141 4.737293 3.665201 3.745619 4.506277 |
|                                                                                   | 6 7 8 9 10                                        |
|                                                                                   | 6 H 0.000000                                      |
|                                                                                   | 7 H 1.766357 0.000000                             |
|                                                                                   | 8 H 6.358315 7.000842 0.000000                    |
|                                                                                   | 9 C 5.797123 6.222607 1.078373 0.000000           |
|                                                                                   | 10 C 5.899124 5.995143 2.235281 1.419250 0.000000 |

|  |      |          |          |          |          |          |
|--|------|----------|----------|----------|----------|----------|
|  | 11 H | 5.446951 | 5.954429 | 2.696886 | 2.235210 | 3.331795 |
|  | 12 H | 6.519946 | 6.605104 | 2.684036 | 2.224364 | 1.078478 |
|  | 13 C | 5.494936 | 5.236838 | 3.346246 | 2.304970 | 1.411104 |
|  | 14 H | 5.802693 | 5.233362 | 4.354698 | 3.347328 | 2.226287 |
|  | 15 C | 5.075338 | 4.951635 | 3.355599 | 2.313213 | 2.296513 |
|  | 16 H | 5.076951 | 4.729317 | 4.363346 | 3.354474 | 3.339480 |
|  | 17 C | 5.294587 | 5.625446 | 2.239598 | 1.424565 | 2.287421 |
|  | 18 H | 6.442833 | 7.153343 | 5.581256 | 5.729173 | 5.394019 |
|  | 19 C | 6.126888 | 6.595033 | 5.372767 | 5.338203 | 4.771845 |
|  | 20 C | 6.133417 | 6.306354 | 6.441224 | 6.214947 | 5.440274 |
|  | 21 H | 6.381161 | 6.834761 | 3.429285 | 3.485853 | 2.966240 |
|  | 22 H | 6.456267 | 6.645475 | 7.418161 | 7.210746 | 6.482671 |
|  | 23 C | 6.109411 | 5.932332 | 6.246233 | 5.825931 | 4.803565 |
|  | 24 H | 6.415747 | 5.961035 | 7.095432 | 6.567428 | 5.447886 |
|  | 25 C | 6.093152 | 6.010308 | 4.985640 | 4.571871 | 3.489963 |
|  | 26 H | 6.390570 | 6.108995 | 4.863261 | 4.305865 | 3.019543 |
|  | 27 C | 6.099080 | 6.418052 | 4.318869 | 4.194777 | 3.470734 |
|  | 28 C | 3.500753 | 4.184665 | 6.177459 | 5.884390 | 5.599554 |
|  | 29 O | 3.676200 | 4.551092 | 7.066985 | 6.838785 | 6.672823 |
|  | 30 C | 2.856048 | 3.954702 | 3.669270 | 3.306534 | 3.913491 |
|  | 31 O | 2.942497 | 4.364178 | 4.403134 | 4.215157 | 4.991900 |
|  |      | 11       | 12       | 13       | 14       | 15       |
|  | 11 H | 0.000000 |          |          |          |          |
|  | 12 H | 4.340326 | 0.000000 |          |          |          |
|  | 13 C | 3.341988 | 2.219611 | 0.000000 |          |          |
|  | 14 H | 4.352290 | 2.677076 | 1.079217 | 0.000000 |          |
|  | 15 C | 2.231050 | 3.338704 | 1.429942 | 2.240290 | 0.000000 |
|  | 16 H | 2.686772 | 4.348690 | 2.244874 | 2.703526 | 1.078471 |
|  | 17 C | 1.079616 | 3.329281 | 2.298776 | 3.342338 | 1.423401 |
|  | 18 H | 7.409979 | 4.878526 | 6.269588 | 6.567556 | 7.031341 |
|  | 19 C | 7.092230 | 4.216205 | 5.525630 | 5.698663 | 6.413539 |
|  | 20 C | 7.866881 | 4.913223 | 5.899659 | 5.830569 | 6.862015 |
|  | 21 H | 5.537711 | 2.292581 | 4.080483 | 4.488967 | 4.998939 |
|  | 22 H | 8.766201 | 5.987496 | 6.886311 | 6.785762 | 7.793183 |
|  | 23 C | 7.498376 | 4.272451 | 5.046674 | 4.774024 | 6.151698 |
|  | 24 H | 8.132804 | 4.970263 | 5.454745 | 4.984506 | 6.576435 |
|  | 25 C | 6.414596 | 2.864369 | 3.922012 | 3.779907 | 5.113989 |
|  | 26 H | 6.141809 | 2.393500 | 3.272490 | 2.962020 | 4.603571 |
|  | 27 C | 6.126838 | 2.822602 | 4.307530 | 4.506593 | 5.312969 |
|  | 28 C | 6.763686 | 5.629847 | 5.789338 | 5.976229 | 6.159788 |
|  | 29 O | 7.535641 | 6.735965 | 6.853623 | 7.064565 | 7.105712 |
|  | 30 C | 3.017092 | 4.650746 | 3.990372 | 4.765758 | 3.420556 |
|  | 31 O | 3.539933 | 5.724395 | 5.095100 | 5.886496 | 4.379701 |
|  |      | 16       | 17       | 18       | 19       | 20       |
|  | 16 H | 0.000000 |          |          |          |          |
|  | 17 C | 2.235848 | 0.000000 |          |          |          |

|                                                                                                                                   |                                                   |
|-----------------------------------------------------------------------------------------------------------------------------------|---------------------------------------------------|
|                                                                                                                                   | 18 H 7.915052 6.742851 0.000000                   |
|                                                                                                                                   | 19 C 7.269604 6.316142 1.078561 0.000000          |
|                                                                                                                                   | 20 C 7.590832 7.034187 2.241889 1.428761 0.000000 |
|                                                                                                                                   | 21 H 6.004029 4.708849 2.668113 2.216673 3.335603 |
|                                                                                                                                   | 22 H 8.468664 7.976172 2.699885 2.239860 1.079247 |
|                                                                                                                                   | 23 C 6.820438 6.563759 3.347114 2.304930 1.416535 |
|                                                                                                                                   | 24 H 7.121927 7.177847 4.356409 3.347622 2.227910 |
|                                                                                                                                   | 25 C 5.904254 5.434718 3.342803 2.300460 2.297719 |
|                                                                                                                                   | 26 H 5.359567 5.096866 4.353270 3.343785 3.337977 |
|                                                                                                                                   | 27 C 6.229466 5.255172 2.227068 1.414547 2.296283 |
|                                                                                                                                   | 28 C 6.678719 6.225002 3.359388 3.124457 2.988230 |
|                                                                                                                                   | 29 O 7.561924 7.108357 3.972308 3.968041 3.793560 |
|                                                                                                                                   | 30 C 3.871619 2.950220 5.559859 5.357134 5.977281 |
|                                                                                                                                   | 31 O 4.705846 3.773629 6.154842 6.111128 6.762402 |
|                                                                                                                                   | 21 22 23 24 25                                    |
|                                                                                                                                   | 21 H 0.000000                                     |
|                                                                                                                                   | 22 H 4.343571 0.000000                            |
|                                                                                                                                   | 23 C 3.346699 2.227425 0.000000                   |
|                                                                                                                                   | 24 H 4.358901 2.681261 1.078905 0.000000          |
|                                                                                                                                   | 25 C 2.239103 3.340983 1.426016 2.239538 0.000000 |
|                                                                                                                                   | 26 H 2.707774 4.347054 2.232992 2.691008 1.078398 |
|                                                                                                                                   | 27 C 1.077949 3.338937 2.302033 3.345756 1.422425 |
|                                                                                                                                   | 28 C 4.400631 3.116584 3.571047 4.119100 3.998949 |
|                                                                                                                                   | 29 O 5.401883 3.635376 4.551772 5.021483 5.103943 |
|                                                                                                                                   | 30 C 4.713109 6.649673 5.958559 6.619370 5.327537 |
|                                                                                                                                   | 31 O 5.614940 7.331249 6.898512 7.569160 6.358013 |
|                                                                                                                                   | 26 27 28 29 30                                    |
|                                                                                                                                   | 26 H 0.000000                                     |
|                                                                                                                                   | 27 C 2.239265 0.000000                            |
|                                                                                                                                   | 28 C 4.808082 3.753342 0.000000                   |
|                                                                                                                                   | 29 O 5.943782 4.785436 1.150316 0.000000          |
|                                                                                                                                   | 30 C 5.516103 4.916606 4.074072 4.658580 0.000000 |
|                                                                                                                                   | 31 O 6.621148 5.837890 4.539101 4.869774 1.151397 |
|                                                                                                                                   | 31                                                |
|                                                                                                                                   | 31 O 0.000000                                     |
|                                                                                                                                   | 1 2 3 4 5                                         |
|                                                                                                                                   | 1 Ru 0.000000                                     |
|                                                                                                                                   | 2 Ru 2.505866 0.000000                            |
|                                                                                                                                   | 3 P 2.378727 2.378682 0.000000                    |
|                                                                                                                                   | 4 C 3.433722 3.433564 1.863940 0.000000           |
|                                                                                                                                   | 5 H 4.368850 3.831364 2.445821 1.095313 0.000000  |
|                                                                                                                                   | 6 H 3.831118 4.368567 2.445831 1.095314 1.758757  |
|                                                                                                                                   | 7 H 3.395525 3.395082 2.516705 1.090134 1.779888  |
|                                                                                                                                   | 8 H 2.926153 4.814194 4.829811 6.188950 7.116291  |
|                                                                                                                                   | 9 C 2.213687 4.473468 4.247414 5.387286 6.378361  |
|                                                                                                                                   | 10 C 2.268237 4.495286 4.581406 5.339054 6.377876 |
| 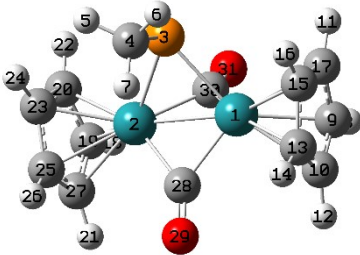 <p>6S. -1184.100111 13.68 Cs<br/>WBI 0.57</p> |                                                   |

## Charges and spin densities

|    |    |           |          |          |          |          |  |  |  |
|----|----|-----------|----------|----------|----------|----------|--|--|--|
| 1  | Ru | 0.199127  |          |          |          |          |  |  |  |
| 2  | Ru | 0.198979  |          |          |          |          |  |  |  |
| 3  | P  | -0.077287 |          |          |          |          |  |  |  |
| 4  | C  | -0.014687 |          |          |          |          |  |  |  |
| 9  | C  | 0.015363  |          |          |          |          |  |  |  |
| 10 | C  | 0.027871  |          |          |          |          |  |  |  |
| 13 | C  | 0.002726  |          |          |          |          |  |  |  |
| 15 | C  | -0.012983 |          |          |          |          |  |  |  |
| 17 | C  | 0.000956  |          |          |          |          |  |  |  |
| 19 | C  | 0.015443  |          |          |          |          |  |  |  |
| 20 | C  | 0.001027  |          |          |          |          |  |  |  |
| 23 | C  | -0.013119 |          |          |          |          |  |  |  |
| 25 | C  | 0.002818  |          |          |          |          |  |  |  |
| 27 | C  | 0.027767  |          |          |          |          |  |  |  |
| 28 | C  | -0.118810 |          |          |          |          |  |  |  |
| 29 | O  | -0.235758 |          |          |          |          |  |  |  |
| 30 | C  | 0.144621  |          |          |          |          |  |  |  |
| 31 | O  | -0.164055 |          |          |          |          |  |  |  |
| 11 | H  | 2.932049  | 4.987937 | 3.683403 | 4.848964 | 5.740617 |  |  |  |
| 12 | H  | 2.994377  | 4.839067 | 5.366271 | 6.097457 | 7.102989 |  |  |  |
| 13 | C  | 2.232353  | 4.534151 | 4.136370 | 4.449105 | 5.533311 |  |  |  |
| 14 | H  | 2.949080  | 4.915470 | 4.638320 | 4.553080 | 5.609416 |  |  |  |
| 15 | C  | 2.201947  | 4.581540 | 3.476110 | 3.905737 | 4.980669 |  |  |  |
| 16 | H  | 2.926679  | 5.026529 | 3.501985 | 3.523006 | 4.562495 |  |  |  |
| 17 | C  | 2.219948  | 4.575315 | 3.587991 | 4.604686 | 5.597381 |  |  |  |
| 18 | H  | 4.813955  | 2.926014 | 4.827489 | 6.187284 | 6.353009 |  |  |  |
| 19 | C  | 4.473354  | 2.213602 | 4.245946 | 5.386223 | 5.483158 |  |  |  |
| 20 | C  | 4.575269  | 2.219981 | 3.586677 | 4.602638 | 4.480791 |  |  |  |
| 21 | H  | 4.839240  | 2.994423 | 5.366534 | 6.099310 | 6.351120 |  |  |  |
| 22 | H  | 4.987837  | 2.932086 | 3.681126 | 4.845378 | 4.635573 |  |  |  |
| 23 | C  | 4.581297  | 2.201733 | 3.476436 | 3.905145 | 3.671040 |  |  |  |
| 24 | H  | 5.026271  | 2.926498 | 3.502960 | 3.522116 | 3.015496 |  |  |  |
| 25 | C  | 4.534101  | 2.232243 | 4.137518 | 4.450797 | 4.439222 |  |  |  |
| 26 | H  | 4.915397  | 2.948936 | 4.640391 | 4.556325 | 4.544217 |  |  |  |
| 27 | C  | 4.495327  | 2.268217 | 4.581454 | 5.340067 | 5.488098 |  |  |  |
| 28 | C  | 1.996718  | 1.996565 | 3.362757 | 3.937206 | 4.673793 |  |  |  |
| 29 | O  | 3.004743  | 3.004714 | 4.478384 | 4.783229 | 5.495100 |  |  |  |
| 30 | C  | 2.037732  | 2.038481 | 2.567370 | 4.278326 | 4.878889 |  |  |  |
| 31 | O  | 3.038426  | 3.038701 | 3.416369 | 5.237753 | 5.765810 |  |  |  |
|    |    | 6         | 7        | 8        | 9        | 10       |  |  |  |
| 6  | H  | 0.000000  |          |          |          |          |  |  |  |
| 7  | H  | 1.779880  | 0.000000 |          |          |          |  |  |  |
| 8  | H  | 6.354744  | 6.273180 | 0.000000 |          |          |  |  |  |
| 9  | C  | 5.484093  | 5.412373 | 1.079780 | 0.000000 |          |  |  |  |
| 10 | C  | 5.486502  | 5.080713 | 2.229940 | 1.418567 | 0.000000 |  |  |  |
| 11 | H  | 4.639736  | 5.284281 | 2.687522 | 2.238391 | 3.352952 |  |  |  |
| 12 | H  | 6.348659  | 5.710953 | 2.690195 | 2.233873 | 1.079160 |  |  |  |
| 13 | C  | 4.436498  | 4.130102 | 3.328990 | 2.285172 | 1.416289 |  |  |  |
| 14 | H  | 4.539492  | 4.008890 | 4.339672 | 3.329199 | 2.227882 |  |  |  |
| 15 | C  | 3.670969  | 3.930700 | 3.334311 | 2.292511 | 2.306425 |  |  |  |
| 16 | H  | 3.015598  | 3.643704 | 4.346299 | 3.337624 | 3.347116 |  |  |  |
| 17 | C  | 4.482897  | 4.823493 | 2.232224 | 1.425892 | 2.312009 |  |  |  |
| 18 | H  | 7.114410  | 6.272167 | 5.831660 | 6.027679 | 6.327741 |  |  |  |
| 19 | C  | 6.377191  | 5.411559 | 6.027649 | 6.030326 | 6.186137 |  |  |  |
| 20 | C  | 5.595504  | 4.821177 | 6.499388 | 6.368342 | 6.613878 |  |  |  |
| 21 | H  | 7.104559  | 5.713279 | 6.390911 | 6.305057 | 5.985823 |  |  |  |
| 22 | H  | 5.737267  | 5.280647 | 6.718480 | 6.648748 | 7.092875 |  |  |  |
| 23 | C  | 4.980282  | 3.928929 | 6.977578 | 6.640844 | 6.635776 |  |  |  |
| 24 | H  | 4.562056  | 3.640824 | 7.600331 | 7.164619 | 7.159083 |  |  |  |
| 25 | C  | 5.534861  | 4.131093 | 6.878850 | 6.534293 | 6.273704 |  |  |  |
| 26 | H  | 5.612442  | 4.011328 | 7.402991 | 6.948961 | 6.484216 |  |  |  |
| 27 | C  | 6.378686  | 5.081824 | 6.325663 | 6.184972 | 6.011067 |  |  |  |
| 28 | C  | 4.673393  | 3.444120 | 4.240090 | 3.703913 | 3.135776 |  |  |  |
| 29 | O  | 5.494596  | 4.085181 | 4.883003 | 4.359036 | 3.469423 |  |  |  |



|    |   |          |          |          |          |          |
|----|---|----------|----------|----------|----------|----------|
| 30 | C | 4.878574 | 4.532988 | 3.202942 | 3.153754 | 3.768897 |
| 31 | O | 5.765705 | 5.609340 | 3.243728 | 3.530161 | 4.429090 |
|    |   | 11       | 12       | 13       | 14       | 15       |
| 11 | H | 0.000000 |          |          |          |          |
| 12 | H | 4.362392 | 0.000000 |          |          |          |
| 13 | C | 3.346687 | 2.230264 | 0.000000 |          |          |
| 14 | H | 4.355853 | 2.685524 | 1.079835 | 0.000000 |          |
| 15 | C | 2.235174 | 3.349699 | 1.427082 | 2.236505 | 0.000000 |
| 16 | H | 2.696760 | 4.356517 | 2.237208 | 2.689921 | 1.078952 |
| 17 | C | 1.078481 | 3.355162 | 2.302120 | 3.344261 | 1.419391 |
| 18 | H | 6.714925 | 6.394623 | 6.880301 | 7.405440 | 6.976854 |
| 19 | C | 6.646758 | 6.307049 | 6.535257 | 6.950592 | 6.640608 |
| 20 | C | 6.531661 | 6.935298 | 6.707984 | 7.113244 | 6.569073 |
| 21 | H | 7.515675 | 5.766862 | 6.390008 | 6.544373 | 6.955360 |
| 22 | H | 6.497556 | 7.517744 | 7.182042 | 7.685292 | 6.844042 |
| 23 | C | 6.845295 | 6.953943 | 6.485854 | 6.689089 | 6.441406 |
| 24 | H | 7.112876 | 7.575868 | 6.812755 | 6.952805 | 6.640094 |
| 25 | C | 7.182618 | 6.387753 | 6.215473 | 6.286979 | 6.486886 |
| 26 | H | 7.686506 | 6.540268 | 6.286733 | 6.171455 | 6.690724 |
| 27 | C | 7.091566 | 5.985739 | 6.274990 | 6.486582 | 6.636646 |
| 28 | C | 4.917671 | 3.243865 | 3.197956 | 3.363523 | 3.829102 |
| 29 | O | 5.847966 | 3.249183 | 3.568535 | 3.451472 | 4.520207 |
| 30 | C | 3.532011 | 4.272002 | 4.185881 | 4.960559 | 3.952305 |
| 31 | O | 3.713386 | 4.900371 | 5.028921 | 5.902964 | 4.684771 |
|    |   | 16       | 17       | 18       | 19       | 20       |
| 16 | H | 0.000000 |          |          |          |          |
| 17 | C | 2.232989 | 0.000000 |          |          |          |
| 18 | H | 7.598862 | 6.497483 | 0.000000 |          |          |
| 19 | C | 7.163993 | 6.367270 | 1.079783 | 0.000000 |          |
| 20 | C | 6.895122 | 6.387035 | 2.232154 | 1.425816 | 0.000000 |
| 21 | H | 7.578165 | 6.934127 | 2.690183 | 2.233905 | 3.355166 |
| 22 | H | 7.110228 | 6.531758 | 2.687451 | 2.238326 | 1.078479 |
| 23 | C | 6.640182 | 6.569605 | 3.334267 | 2.292459 | 1.419436 |
| 24 | H | 6.664275 | 6.896367 | 4.346259 | 3.337573 | 2.233039 |
| 25 | C | 6.814685 | 6.708172 | 3.328959 | 2.285155 | 2.302179 |
| 26 | H | 6.956042 | 7.113708 | 4.339646 | 3.329191 | 3.344319 |
| 27 | C | 7.160488 | 6.613112 | 2.229959 | 1.418617 | 2.312034 |
| 28 | C | 4.458000 | 4.127501 | 4.241858 | 3.705038 | 4.127614 |
| 29 | O | 5.159326 | 4.952641 | 4.886041 | 4.361025 | 4.953062 |
| 30 | C | 4.606810 | 3.334646 | 3.202271 | 3.153801 | 3.336381 |
| 31 | O | 5.360667 | 3.765902 | 3.241497 | 3.529096 | 3.767356 |
|    |   | 21       | 22       | 23       | 24       | 25       |
| 21 | H | 0.000000 |          |          |          |          |
| 22 | H | 4.362392 | 0.000000 |          |          |          |
| 23 | C | 3.349709 | 2.235220 | 0.000000 |          |          |
| 24 | H | 4.356525 | 2.696827 | 1.078953 | 0.000000 |          |

|                                                                                    |           |           |          |          |          |          |
|------------------------------------------------------------------------------------|-----------|-----------|----------|----------|----------|----------|
|                                                                                    | 25 C      | 2.230247  | 3.346747 | 1.427122 | 2.237242 | 0.000000 |
|                                                                                    | 26 H      | 2.685527  | 4.355914 | 2.236535 | 2.689949 | 1.079835 |
|                                                                                    | 27 C      | 1.079157  | 3.352979 | 2.306423 | 3.347108 | 1.416247 |
|                                                                                    | 28 C      | 3.245450  | 4.917795 | 3.827896 | 4.456116 | 3.197068 |
|                                                                                    | 29 O      | 3.252126  | 5.848398 | 4.518805 | 5.156841 | 3.567480 |
|                                                                                    | 30 C      | 4.270672  | 3.534435 | 3.953810 | 4.608880 | 4.186266 |
|                                                                                    | 31 O      | 4.897459  | 3.716159 | 4.686094 | 5.362957 | 5.028616 |
|                                                                                    |           | 26        | 27       | 28       | 29       | 30       |
|                                                                                    | 26 H      | 0.000000  |          |          |          |          |
|                                                                                    | 27 C      | 2.227848  | 0.000000 |          |          |          |
|                                                                                    | 28 C      | 3.361888  | 3.136607 | 0.000000 |          |          |
|                                                                                    | 29 O      | 3.449044  | 3.471016 | 1.176633 | 0.000000 |          |
|                                                                                    | 30 C      | 4.960717  | 3.768394 | 2.876267 | 3.965339 | 0.000000 |
|                                                                                    | 31 O      | 5.902482  | 4.427371 | 3.959776 | 4.984333 | 1.160778 |
|                                                                                    |           | 31        |          |          |          |          |
|                                                                                    | 31 O      | 0.000000  |          |          |          |          |
|                                                                                    |           | 1         | 2        | 3        | 4        | 5        |
|                                                                                    | 1 Ru      | 0.000000  |          |          |          |          |
|                                                                                    | 2 Ru      | 2.496012  | 0.000000 |          |          |          |
|                                                                                    | 3 P       | 2.372241  | 2.372228 | 0.000000 |          |          |
|                                                                                    | 4 C       | 3.413241  | 3.413179 | 1.857828 | 0.000000 |          |
|                                                                                    | 5 H       | 4.348449  | 3.810945 | 2.436457 | 1.095048 | 0.000000 |
|                                                                                    | 6 H       | 3.810878  | 4.348347 | 2.436454 | 1.095049 | 1.757009 |
|                                                                                    | 7 H       | 3.384603  | 3.384450 | 2.521583 | 1.090204 | 1.778432 |
|                                                                                    | 8 H       | 2.966129  | 4.874464 | 5.115279 | 6.318430 | 7.280827 |
|                                                                                    | 9 C       | 2.254944  | 4.521043 | 4.410479 | 5.445636 | 6.455292 |
|                                                                                    | 10 C      | 2.259143  | 4.522038 | 4.483597 | 5.058850 | 6.117737 |
|                                                                                    | 11 H      | 2.968820  | 4.976893 | 4.009965 | 5.328113 | 6.213839 |
|                                                                                    | 12 H      | 2.973895  | 4.878674 | 5.236041 | 5.676612 | 6.706142 |
|                                                                                    | 13 C      | 2.256138  | 4.573389 | 3.887802 | 4.111350 | 5.205279 |
|                                                                                    | 14 H      | 2.972044  | 4.971829 | 4.244399 | 3.979621 | 5.048623 |
|                                                                                    | 15 C      | 2.247172  | 4.601649 | 3.374042 | 3.953282 | 4.999106 |
|                                                                                    | 16 H      | 2.966481  | 5.031179 | 3.318367 | 3.671997 | 4.645653 |
|                                                                                    | 17 C      | 2.254771  | 4.577142 | 3.755352 | 4.852861 | 5.834989 |
|                                                                                    | 18 H      | 4.874568  | 2.966129 | 5.115313 | 6.318327 | 6.517424 |
|                                                                                    | 19 C      | 4.521100  | 2.254942 | 4.410482 | 5.445484 | 5.555234 |
|                                                                                    | 20 C      | 4.577193  | 2.254761 | 3.755350 | 4.852689 | 4.783003 |
|                                                                                    | 21 H      | 4.878646  | 2.973903 | 5.235994 | 5.676415 | 5.868709 |
|                                                                                    | 22 H      | 4.976983  | 2.968810 | 4.009998 | 5.327986 | 5.232506 |
|                                                                                    | 23 C      | 4.601631  | 2.247172 | 3.373984 | 3.953020 | 3.693031 |
|                                                                                    | 24 H      | 5.031153  | 2.966486 | 3.318298 | 3.671709 | 3.155448 |
|                                                                                    | 25 C      | 4.573336  | 2.256153 | 3.887725 | 4.111069 | 3.994139 |
|                                                                                    | 26 H      | 4.971723  | 2.972057 | 4.244287 | 3.979283 | 3.782084 |
|                                                                                    | 27 C      | 4.522026  | 2.259151 | 4.483555 | 5.058642 | 5.159778 |
|                                                                                    | 28 C      | 2.009392  | 2.009504 | 3.016539 | 3.300295 | 4.046965 |
|                                                                                    | 29 O      | 3.014788  | 3.014811 | 3.998122 | 3.820464 | 4.513664 |
| 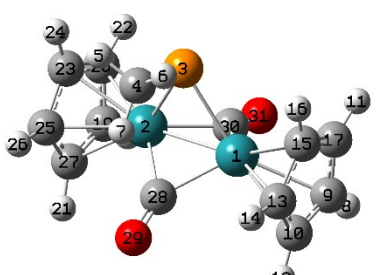 |           |           |          |          |          |          |
| 7T. -1184.097507 15.26 Cs<br>WBI 0.44                                              |           |           |          |          |          |          |
| Charges and spin densities                                                         |           |           |          |          |          |          |
|                                                                                    | 1         | 2         |          |          |          |          |
| 1 Ru                                                                               | 0.226688  | 0.662103  |          |          |          |          |
| 2 Ru                                                                               | 0.226687  | 0.662170  |          |          |          |          |
| 3 P                                                                                | -0.069020 | 0.184265  |          |          |          |          |
| 4 C                                                                                | 0.008646  | 0.000678  |          |          |          |          |
| 9 C                                                                                | 0.008140  | 0.012302  |          |          |          |          |
| 10 C                                                                               | 0.002818  | 0.032070  |          |          |          |          |
| 13 C                                                                               | -0.009516 | 0.069929  |          |          |          |          |
| 15 C                                                                               | 0.010549  | -0.021078 |          |          |          |          |
| 17 C                                                                               | -0.008545 | 0.076435  |          |          |          |          |
| 19 C                                                                               | 0.008119  | 0.012293  |          |          |          |          |
| 20 C                                                                               | -0.008550 | 0.076424  |          |          |          |          |
| 23 C                                                                               | 0.010550  | -0.021078 |          |          |          |          |
| 25 C                                                                               | -0.009512 | 0.069954  |          |          |          |          |
| 27 C                                                                               | 0.002833  | 0.032080  |          |          |          |          |
| 28 C                                                                               | -0.033232 | 0.011244  |          |          |          |          |
| 29 O                                                                               | -0.196069 | 0.065452  |          |          |          |          |
| 30 C                                                                               | 0.022640  | 0.010831  |          |          |          |          |

|      |           |          |          |          |          |  |  |  |  |  |
|------|-----------|----------|----------|----------|----------|--|--|--|--|--|
| 31 O | -0.193226 | 0.063925 |          |          |          |  |  |  |  |  |
| 30 C | 2.014536  | 2.014461 | 2.962090 | 4.546673 | 5.180433 |  |  |  |  |  |
| 31 O | 3.019423  | 3.019412 | 3.933591 | 5.631297 | 6.220251 |  |  |  |  |  |
|      | 6         | 7        | 8        | 9        | 10       |  |  |  |  |  |
| 6 H  | 0.000000  |          |          |          |          |  |  |  |  |  |
| 7 H  | 1.778430  | 0.000000 |          |          |          |  |  |  |  |  |
| 8 H  | 6.517444  | 6.269934 | 0.000000 |          |          |  |  |  |  |  |
| 9 C  | 5.555281  | 5.397756 | 1.079486 | 0.000000 |          |  |  |  |  |  |
| 10 C | 5.159812  | 4.759570 | 2.230476 | 1.416800 | 0.000000 |  |  |  |  |  |
| 11 H | 5.232623  | 5.714786 | 2.689998 | 2.236324 | 3.342634 |  |  |  |  |  |
| 12 H | 5.868711  | 5.198181 | 2.689737 | 2.230926 | 1.079412 |  |  |  |  |  |
| 13 C | 3.994223  | 3.878386 | 3.342336 | 2.298358 | 1.423307 |  |  |  |  |  |
| 14 H | 3.782172  | 3.560099 | 4.351646 | 3.340957 | 2.235297 |  |  |  |  |  |
| 15 C | 3.693179  | 4.105571 | 3.338342 | 2.295776 | 2.296648 |  |  |  |  |  |
| 16 H | 3.155668  | 4.021764 | 4.347028 | 3.338328 | 3.340099 |  |  |  |  |  |
| 17 C | 4.783108  | 5.061265 | 2.232253 | 1.422831 | 2.299848 |  |  |  |  |  |
| 18 H | 7.280736  | 6.269685 | 5.994755 | 6.168056 | 6.467621 |  |  |  |  |  |
| 19 C | 6.455154  | 5.397434 | 6.168016 | 6.151941 | 6.310987 |  |  |  |  |  |
| 20 C | 5.834881  | 5.060918 | 6.564270 | 6.413316 | 6.661048 |  |  |  |  |  |
| 21 H | 6.705876  | 5.197799 | 6.569445 | 6.468542 | 6.164868 |  |  |  |  |  |
| 22 H | 6.213810  | 5.714504 | 6.749667 | 6.657944 | 7.104522 |  |  |  |  |  |
| 23 C | 4.998905  | 4.105097 | 7.062052 | 6.709278 | 6.707616 |  |  |  |  |  |
| 24 H | 4.645463  | 4.021273 | 7.652110 | 7.200192 | 7.199146 |  |  |  |  |  |
| 25 C | 5.204992  | 3.877857 | 7.012779 | 6.654859 | 6.403487 |  |  |  |  |  |
| 26 H | 5.048247  | 3.559474 | 7.555701 | 7.093262 | 6.642514 |  |  |  |  |  |
| 27 C | 6.117500  | 4.759163 | 6.467554 | 6.310951 | 6.147817 |  |  |  |  |  |
| 28 C | 4.046769  | 2.737740 | 4.399958 | 3.839372 | 3.239293 |  |  |  |  |  |
| 29 O | 4.513467  | 2.972263 | 5.107466 | 4.540586 | 3.632007 |  |  |  |  |  |
| 30 C | 5.180406  | 4.683169 | 3.260472 | 3.184765 | 3.763456 |  |  |  |  |  |
| 31 O | 6.220227  | 5.834308 | 3.288126 | 3.544642 | 4.420489 |  |  |  |  |  |
|      | 11        | 12       | 13       | 14       | 15       |  |  |  |  |  |
| 11 H | 0.000000  |          |          |          |          |  |  |  |  |  |
| 12 H | 4.353434  | 0.000000 |          |          |          |  |  |  |  |  |
| 13 C | 3.344006  | 2.233361 | 0.000000 |          |          |  |  |  |  |  |
| 14 H | 4.354008  | 2.689041 | 1.079200 | 0.000000 |          |  |  |  |  |  |
| 15 C | 2.233152  | 3.339226 | 1.419345 | 2.233506 | 0.000000 |  |  |  |  |  |
| 16 H | 2.686148  | 4.349265 | 2.231195 | 2.690656 | 1.079001 |  |  |  |  |  |
| 17 C | 1.078894  | 3.343712 | 2.301494 | 3.344809 | 1.420269 |  |  |  |  |  |
| 18 H | 6.749707  | 6.569507 | 7.012872 | 7.555816 | 7.062143 |  |  |  |  |  |
| 19 C | 6.657934  | 6.468581 | 6.654922 | 7.093357 | 6.709332 |  |  |  |  |  |
| 20 C | 6.465292  | 7.019483 | 6.752843 | 7.186440 | 6.563897 |  |  |  |  |  |
| 21 H | 7.567000  | 5.992459 | 6.556055 | 6.735664 | 7.061459 |  |  |  |  |  |
| 22 H | 6.392618  | 7.567054 | 7.191253 | 7.722899 | 6.803426 |  |  |  |  |  |
| 23 C | 6.803341  | 7.061471 | 6.555588 | 6.790097 | 6.460430 |  |  |  |  |  |
| 24 H | 7.036026  | 7.652443 | 6.850053 | 7.024534 | 6.625994 |  |  |  |  |  |
| 25 C | 7.191160  | 6.556054 | 6.340294 | 6.443348 | 6.555562 |  |  |  |  |  |
| 26 H | 7.722770  | 6.735636 | 6.443305 | 6.364340 | 6.790024 |  |  |  |  |  |

|    |   |          |          |          |          |          |
|----|---|----------|----------|----------|----------|----------|
| 27 | C | 7.104468 | 6.164880 | 6.403506 | 6.642567 | 6.707618 |
| 28 | C | 4.976142 | 3.363462 | 3.264138 | 3.413314 | 3.872948 |
| 29 | O | 5.920320 | 3.465114 | 3.641399 | 3.489171 | 4.553651 |
| 30 | C | 3.520835 | 4.275722 | 4.189115 | 4.969511 | 3.946832 |
| 31 | O | 3.677110 | 4.906520 | 5.026493 | 5.907987 | 4.665420 |
|    |   | 16       | 17       | 18       | 19       | 20       |
| 16 | H | 0.000000 |          |          |          |          |
| 17 | C | 2.229640 | 0.000000 |          |          |          |
| 18 | H | 7.652207 | 6.564330 | 0.000000 |          |          |
| 19 | C | 7.200251 | 6.413331 | 1.079487 | 0.000000 |          |
| 20 | C | 6.857500 | 6.356737 | 2.232254 | 1.422831 | 0.000000 |
| 21 | H | 7.652430 | 7.019448 | 2.689739 | 2.230927 | 3.343712 |
| 22 | H | 7.036126 | 6.465324 | 2.690001 | 2.236325 | 1.078894 |
| 23 | C | 6.626000 | 6.563847 | 3.338342 | 2.295776 | 1.420269 |
| 24 | H | 6.615596 | 6.857440 | 4.347029 | 3.338328 | 2.229639 |
| 25 | C | 6.850028 | 6.752779 | 3.342337 | 2.298358 | 2.301494 |
| 26 | H | 7.024457 | 7.186338 | 4.351646 | 3.340957 | 3.344810 |
| 27 | C | 7.199150 | 6.661017 | 2.230478 | 1.416800 | 2.299847 |
| 28 | C | 4.467367 | 4.194025 | 4.400066 | 3.839471 | 4.194120 |
| 29 | O | 5.139418 | 5.035448 | 5.107440 | 4.540536 | 5.035406 |
| 30 | C | 4.586671 | 3.324351 | 3.260541 | 3.184792 | 3.324360 |
| 31 | O | 5.324728 | 3.737058 | 3.288354 | 3.544817 | 3.737206 |
|    |   | 21       | 22       | 23       | 24       | 25       |
| 21 | H | 0.000000 |          |          |          |          |
| 22 | H | 4.353435 | 0.000000 |          |          |          |
| 23 | C | 3.339224 | 2.233152 | 0.000000 |          |          |
| 24 | H | 4.349264 | 2.686146 | 1.079002 | 0.000000 |          |
| 25 | C | 2.233359 | 3.344006 | 1.419344 | 2.231195 | 0.000000 |
| 26 | H | 2.689038 | 4.354008 | 2.233506 | 2.690658 | 1.079201 |
| 27 | C | 1.079412 | 3.342634 | 2.296646 | 3.340097 | 1.423306 |
| 28 | C | 3.363518 | 4.976244 | 3.873023 | 4.467434 | 3.264202 |
| 29 | O | 3.464996 | 5.920303 | 4.553583 | 5.139362 | 3.641294 |
| 30 | C | 4.275711 | 3.520868 | 3.946801 | 4.586634 | 4.189079 |
| 31 | O | 4.906624 | 3.677281 | 4.665508 | 5.324795 | 5.026571 |
|    |   | 26       | 27       | 28       | 29       | 30       |
| 26 | H | 0.000000 |          |          |          |          |
| 27 | C | 2.235296 | 0.000000 |          |          |          |
| 28 | C | 3.413339 | 3.239370 | 0.000000 |          |          |
| 29 | O | 3.489029 | 3.631911 | 1.169502 | 0.000000 |          |
| 30 | C | 4.969453 | 3.763446 | 2.927972 | 4.040531 | 0.000000 |
| 31 | O | 5.908031 | 4.420603 | 4.034529 | 5.101026 | 1.168077 |
|    |   | 31       |          |          |          |          |
| 31 | O | 0.000000 |          |          |          |          |

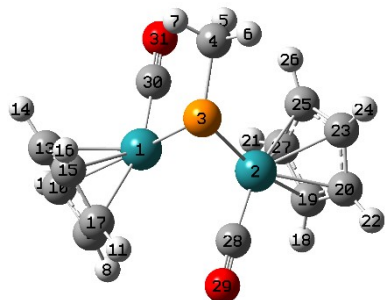

8T. -1184.093642 17.69 Cs  
WBI 0.46

Charges and spin densities

|      | 1         | 2         |
|------|-----------|-----------|
| 1 Ru | 0.379243  | 0.929524  |
| 2 Ru | 0.368773  | 0.381673  |
| 3 P  | -0.124242 | 0.507859  |
| 4 C  | 0.011777  | 0.029432  |
| 9 C  | -0.018481 | 0.083769  |
| 10 C | -0.025753 | -0.007944 |
| 13 C | -0.030575 | 0.002106  |
| 15 C | 0.041521  | 0.025202  |
| 17 C | -0.007333 | 0.001035  |
| 19 C | -0.024990 | 0.029493  |
| 20 C | -0.036497 | -0.016867 |
| 23 C | 0.001592  | 0.041050  |
| 25 C | -0.054092 | -0.003477 |
| 27 C | 0.003904  | -0.012194 |
| 28 C | -0.065450 | 0.005129  |
| 29 O | -0.173918 | 0.015775  |
| 30 C | -0.079257 | -0.024952 |
| 31 O | -0.166222 | 0.013388  |

|      | 1        | 2        | 3        | 4        | 5        |
|------|----------|----------|----------|----------|----------|
| 1 Ru | 0.000000 |          |          |          |          |
| 2 Ru | 2.750712 | 0.000000 |          |          |          |
| 3 P  | 2.304445 | 2.229678 | 0.000000 |          |          |
| 4 C  | 3.565337 | 3.556719 | 1.839236 | 0.000000 |          |
| 5 H  | 3.697033 | 3.651675 | 2.467657 | 1.091636 | 0.000000 |
| 6 H  | 4.484157 | 3.925237 | 2.422610 | 1.092219 | 1.780644 |
| 7 H  | 3.832261 | 4.439957 | 2.433849 | 1.092477 | 1.773442 |
| 8 H  | 3.009555 | 4.290008 | 4.812627 | 6.436442 | 6.636006 |
| 9 C  | 2.299098 | 4.166463 | 4.189982 | 5.724190 | 5.980110 |
| 10 C | 2.252815 | 4.742794 | 4.446417 | 5.630259 | 5.738312 |
| 11 H | 3.044157 | 4.028093 | 3.646258 | 5.362450 | 5.981222 |
| 12 H | 2.971267 | 5.339249 | 5.257595 | 6.306203 | 6.251463 |
| 13 C | 2.247661 | 4.950813 | 3.982968 | 4.925398 | 5.172235 |
| 14 H | 2.960832 | 5.680992 | 4.498617 | 5.068087 | 5.232496 |
| 15 C | 2.290804 | 4.540821 | 3.360008 | 4.561494 | 5.081697 |
| 16 H | 3.010378 | 4.973627 | 3.380532 | 4.354417 | 5.042002 |
| 17 C | 2.312590 | 4.011789 | 3.500792 | 5.095220 | 5.592279 |
| 18 H | 4.746605 | 2.971060 | 5.161125 | 6.353149 | 6.145511 |
| 19 C | 4.341735 | 2.242928 | 4.417307 | 5.435981 | 5.188773 |
| 20 C | 4.877570 | 2.223535 | 4.236905 | 5.124236 | 5.011331 |
| 21 H | 3.695854 | 2.998291 | 4.459809 | 5.106410 | 4.536902 |
| 22 H | 5.653403 | 2.953109 | 4.877694 | 5.850786 | 5.865592 |
| 23 C | 4.711927 | 2.240538 | 3.675933 | 4.094206 | 3.868863 |
| 24 H | 5.368327 | 2.964804 | 3.904252 | 4.014955 | 3.885998 |
| 25 C | 4.022668 | 2.254600 | 3.492085 | 3.749384 | 3.228414 |
| 26 H | 4.187512 | 2.996030 | 3.588233 | 3.334028 | 2.564344 |
| 27 C | 3.763279 | 2.260997 | 3.993333 | 4.691580 | 4.226035 |
| 28 C | 3.188470 | 1.843292 | 3.033324 | 4.775968 | 5.158311 |
| 29 O | 3.955906 | 2.993363 | 3.956785 | 5.750810 | 6.224671 |
| 30 C | 1.826072 | 3.383728 | 2.896779 | 3.199781 | 2.808719 |
| 31 O | 2.978026 | 4.183670 | 3.714061 | 3.479193 | 2.774342 |

  

|      | 6        | 7        | 8        | 9        | 10       |
|------|----------|----------|----------|----------|----------|
| 6 H  | 0.000000 |          |          |          |          |
| 7 H  | 1.772077 | 0.000000 |          |          |          |
| 8 H  | 7.216090 | 6.724009 | 0.000000 |          |          |
| 9 C  | 6.561001 | 5.882478 | 1.079843 | 0.000000 |          |
| 10 C | 6.605612 | 5.628910 | 2.233914 | 1.420086 | 0.000000 |
| 11 H | 5.927689 | 5.517056 | 2.675603 | 2.225710 | 3.339098 |
| 12 H | 7.321731 | 6.322586 | 2.697225 | 2.236061 | 1.079245 |
| 13 C | 5.911040 | 4.687273 | 3.344149 | 2.299074 | 1.427127 |
| 14 H | 6.095268 | 4.648394 | 4.354463 | 3.342004 | 2.238260 |
| 15 C | 5.392680 | 4.357134 | 3.336802 | 2.294240 | 2.298233 |
| 16 H | 5.082653 | 3.973687 | 4.344053 | 3.335888 | 3.341974 |
| 17 C | 5.828263 | 5.168023 | 2.223224 | 1.414313 | 2.297416 |
| 18 H | 6.712384 | 7.258853 | 4.763405 | 5.256439 | 5.932069 |

|    |   |          |          |          |          |          |
|----|---|----------|----------|----------|----------|----------|
| 19 | C | 5.743850 | 6.392157 | 5.029787 | 5.312336 | 5.876640 |
| 20 | C | 5.161330 | 6.163978 | 5.880172 | 6.050409 | 6.704875 |
| 21 | H | 5.731142 | 5.886634 | 4.906376 | 4.980289 | 4.991017 |
| 22 | H | 5.757032 | 6.884052 | 6.351026 | 6.603455 | 7.416122 |
| 23 | C | 4.045860 | 5.176635 | 6.409147 | 6.352143 | 6.782094 |
| 24 | H | 3.683035 | 5.101172 | 7.245526 | 7.107883 | 7.536937 |
| 25 | C | 4.028943 | 4.752577 | 5.976544 | 5.844318 | 6.009716 |
| 26 | H | 3.663911 | 4.265657 | 6.517602 | 6.240281 | 6.183721 |
| 27 | C | 5.152630 | 5.598229 | 5.100241 | 5.168583 | 5.394312 |
| 28 | C | 5.099303 | 5.466677 | 3.470675 | 3.552903 | 4.611748 |
| 29 | O | 6.039521 | 6.352221 | 3.434396 | 3.680311 | 4.952648 |
| 30 | C | 4.227393 | 3.459212 | 4.518962 | 3.887840 | 3.306754 |
| 31 | O | 4.462626 | 3.687566 | 5.573215 | 4.972644 | 4.240791 |
|    |   | 11       | 12       | 13       | 14       | 15       |
| 11 | H | 0.000000 |          |          |          |          |
| 12 | H | 4.349510 | 0.000000 |          |          |          |
| 13 | C | 3.339942 | 2.237620 | 0.000000 |          |          |
| 14 | H | 4.350365 | 2.693287 | 1.079198 | 0.000000 |          |
| 15 | C | 2.234980 | 3.340160 | 1.415152 | 2.228825 | 0.000000 |
| 16 | H | 2.689572 | 4.350532 | 2.227755 | 2.685971 | 1.078871 |
| 17 | C | 1.078210 | 3.341076 | 2.298168 | 3.341797 | 1.422848 |
| 18 | H | 5.771233 | 6.120965 | 6.749343 | 7.548597 | 6.656438 |
| 19 | C | 5.686849 | 6.144021 | 6.497324 | 7.224578 | 6.370363 |
| 20 | C | 5.924394 | 7.137278 | 7.100052 | 7.821750 | 6.738163 |
| 21 | H | 6.042483 | 4.971389 | 5.623925 | 6.111470 | 5.965745 |
| 22 | H | 6.220152 | 7.905134 | 7.821985 | 8.608369 | 7.320266 |
| 23 | C | 6.214352 | 7.235652 | 6.941463 | 7.511424 | 6.624363 |
| 24 | H | 6.718311 | 8.063987 | 7.534290 | 8.055176 | 7.104895 |
| 25 | C | 6.151658 | 6.322124 | 6.202317 | 6.659758 | 6.159282 |
| 26 | H | 6.622851 | 6.457034 | 6.208321 | 6.497021 | 6.278593 |
| 27 | C | 5.832037 | 5.568632 | 5.903842 | 6.467260 | 5.997223 |
| 28 | C | 2.844152 | 5.356582 | 4.950622 | 5.897483 | 4.226979 |
| 29 | O | 2.628391 | 5.728248 | 5.359178 | 6.379862 | 4.508843 |
| 30 | C | 4.853502 | 3.571945 | 3.164862 | 3.316401 | 3.690409 |
| 31 | O | 5.998239 | 4.312476 | 4.053613 | 3.954063 | 4.711594 |
|    |   | 16       | 17       | 18       | 19       | 20       |
| 16 | H | 0.000000 |          |          |          |          |
| 17 | C | 2.232723 | 0.000000 |          |          |          |
| 18 | H | 7.379134 | 5.753676 | 0.000000 |          |          |
| 19 | C | 6.993336 | 5.638773 | 1.079277 | 0.000000 |          |
| 20 | C | 7.173672 | 6.059398 | 2.241230 | 1.430156 | 0.000000 |
| 21 | H | 6.685052 | 5.590111 | 2.683268 | 2.227134 | 3.345797 |
| 22 | H | 7.711609 | 6.523853 | 2.698969 | 2.241801 | 1.078974 |
| 23 | C | 6.929656 | 6.234968 | 3.343671 | 2.301105 | 1.417524 |
| 24 | H | 7.259163 | 6.814727 | 4.354130 | 3.344888 | 2.228805 |
| 25 | C | 6.566433 | 5.926111 | 3.339408 | 2.295910 | 2.298132 |

|                                                                                     |                                       |          |          |          |          |          |
|-------------------------------------------------------------------------------------|---------------------------------------|----------|----------|----------|----------|----------|
|                                                                                     | 26 H                                  | 6.606020 | 6.285740 | 4.346271 | 3.336859 | 3.341612 |
|                                                                                     | 27 C                                  | 6.613676 | 5.549801 | 2.227316 | 1.414824 | 2.302424 |
|                                                                                     | 28 C                                  | 4.698809 | 3.232471 | 3.350941 | 3.160779 | 3.171127 |
|                                                                                     | 29 O                                  | 4.971119 | 3.300895 | 3.966557 | 4.021727 | 4.037529 |
|                                                                                     | 30 C                                  | 4.208815 | 4.086524 | 5.189009 | 4.586688 | 5.165207 |
|                                                                                     | 31 O                                  | 5.141009 | 5.219117 | 5.785146 | 5.114621 | 5.680034 |
|                                                                                     |                                       | 21       | 22       | 23       | 24       | 25       |
|                                                                                     | 21 H                                  | 0.000000 |          |          |          |          |
|                                                                                     | 22 H                                  | 4.354412 | 0.000000 |          |          |          |
|                                                                                     | 23 C                                  | 3.344460 | 2.230742 | 0.000000 |          |          |
|                                                                                     | 24 H                                  | 4.354447 | 2.685967 | 1.079340 | 0.000000 |          |
|                                                                                     | 25 C                                  | 2.233820 | 3.341493 | 1.422111 | 2.234895 | 0.000000 |
|                                                                                     | 26 H                                  | 2.685306 | 4.352119 | 2.236444 | 2.695767 | 1.079019 |
|                                                                                     | 27 C                                  | 1.078666 | 3.344344 | 2.302294 | 3.345667 | 1.422727 |
|                                                                                     | 28 C                                  | 4.314192 | 3.383753 | 3.751548 | 4.351954 | 4.046951 |
|                                                                                     | 29 O                                  | 5.284350 | 4.011769 | 4.787176 | 5.336432 | 5.170992 |
|                                                                                     | 30 C                                  | 3.202578 | 6.135361 | 4.622380 | 5.243221 | 3.519860 |
|                                                                                     | 31 O                                  | 3.429928 | 6.710672 | 4.955002 | 5.510691 | 3.695952 |
|                                                                                     |                                       | 26       | 27       | 28       | 29       | 30       |
|                                                                                     | 26 H                                  | 0.000000 |          |          |          |          |
|                                                                                     | 27 C                                  | 2.231301 | 0.000000 |          |          |          |
|                                                                                     | 28 C                                  | 4.838208 | 3.724951 | 0.000000 |          |          |
|                                                                                     | 29 O                                  | 5.986987 | 4.753050 | 1.152244 | 0.000000 |          |
|                                                                                     | 30 C                                  | 3.251062 | 3.498711 | 4.548289 | 5.506823 | 0.000000 |
|                                                                                     | 31 O                                  | 3.129770 | 3.835409 | 5.560377 | 6.570972 | 1.152299 |
|                                                                                     |                                       | 31       |          |          |          |          |
|                                                                                     | 31 O                                  | 0.000000 |          |          |          |          |
|                                                                                     |                                       | 1        | 2        | 3        | 4        | 5        |
|                                                                                     | 1 Ru                                  | 0.000000 |          |          |          |          |
|                                                                                     | 2 Ru                                  | 2.747754 | 0.000000 |          |          |          |
|                                                                                     | 3 P                                   | 2.243201 | 2.280590 | 0.000000 |          |          |
|                                                                                     | 4 C                                   | 3.545142 | 3.573704 | 1.841906 | 0.000000 |          |
|                                                                                     | 5 H                                   | 3.662769 | 3.679197 | 2.469236 | 1.091320 | 0.000000 |
|                                                                                     | 6 H                                   | 3.865505 | 4.476969 | 2.428883 | 1.092347 | 1.782850 |
|                                                                                     | 7 H                                   | 4.446065 | 3.891835 | 2.430213 | 1.092663 | 1.776429 |
|                                                                                     | 8 H                                   | 3.019008 | 4.786447 | 4.615678 | 4.915012 | 4.353955 |
|                                                                                     | 9 C                                   | 2.306158 | 4.577235 | 4.077701 | 4.572252 | 4.237291 |
|                                                                                     | 10 C                                  | 2.252097 | 4.743233 | 4.423432 | 5.371973 | 5.252784 |
|                                                                                     | 11 H                                  | 3.032635 | 4.960160 | 3.560147 | 3.221023 | 2.936516 |
|                                                                                     | 12 H                                  | 2.964173 | 5.111992 | 5.202879 | 6.271165 | 6.104813 |
|                                                                                     | 13 C                                  | 2.268844 | 4.973812 | 4.136967 | 5.173486 | 5.324229 |
|                                                                                     | 14 H                                  | 2.987263 | 5.510943 | 4.732294 | 5.943358 | 6.218729 |
|                                                                                     | 15 C                                  | 2.263703 | 4.890055 | 3.491417 | 4.136889 | 4.336066 |
|                                                                                     | 16 H                                  | 2.980220 | 5.367753 | 3.612439 | 4.125123 | 4.535925 |
|                                                                                     | 17 C                                  | 2.301748 | 4.657126 | 3.463588 | 3.686027 | 3.528923 |
|                                                                                     | 18 H                                  | 5.428363 | 2.965832 | 5.198313 | 6.204989 | 6.100073 |
| 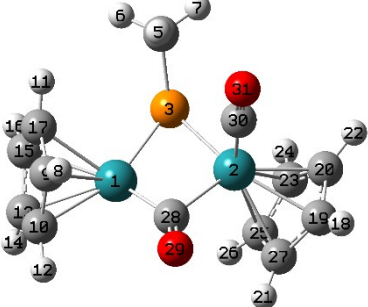 | 9T. -1184.093046 18.06 Cs<br>WBI 0.33 |          |          |          |          |          |
| Charges and spin densities                                                          |                                       |          |          |          |          |          |
|                                                                                     | 1                                     | 2        |          |          |          |          |
| 1 Ru                                                                                | 0.403466                              | 1.295694 |          |          |          |          |
| 2 Ru                                                                                | 0.293425                              | 0.034664 |          |          |          |          |
| 3 P                                                                                 | -0.172825                             | 0.415380 |          |          |          |          |
| 4 C                                                                                 | 0.007896                              | 0.039328 |          |          |          |          |
| 9 C                                                                                 | 0.006821                              | 0.063360 |          |          |          |          |
| 10 C                                                                                | -0.026016                             | 0.009230 |          |          |          |          |

|      |           |           |      |          |          |          |          |          |
|------|-----------|-----------|------|----------|----------|----------|----------|----------|
| 13 C | -0.052424 | 0.096906  |      |          |          |          |          |          |
| 15 C | -0.045576 | 0.048669  |      |          |          |          |          |          |
| 17 C | 0.002074  | 0.018329  |      |          |          |          |          |          |
| 19 C | -0.009585 | -0.000580 |      |          |          |          |          |          |
| 20 C | -0.032627 | -0.003047 |      |          |          |          |          |          |
| 23 C | 0.010245  | 0.011933  |      |          |          |          |          |          |
| 25 C | 0.004758  | -0.007132 |      |          |          |          |          |          |
| 27 C | 0.033800  | 0.005485  |      |          |          |          |          |          |
| 28 C | -0.054054 | -0.042662 |      |          |          |          |          |          |
| 29 O | -0.212504 | 0.010710  |      |          |          |          |          |          |
| 30 C | -0.008692 | 0.000203  |      |          |          |          |          |          |
| 31 O | -0.148182 | 0.003532  |      |          |          |          |          |          |
|      |           |           | 19 C | 4.769186 | 2.250152 | 4.416453 | 5.612213 | 5.674576 |
|      |           |           | 20 C | 4.863845 | 2.213389 | 3.851261 | 4.910969 | 5.164237 |
|      |           |           | 21 H | 4.326002 | 2.996558 | 4.941271 | 6.502979 | 6.581019 |
|      |           |           | 22 H | 5.613668 | 2.941569 | 4.300933 | 4.998861 | 5.218170 |
|      |           |           | 23 C | 4.361307 | 2.274064 | 3.325268 | 4.718016 | 5.218827 |
|      |           |           | 24 H | 4.719283 | 2.988549 | 3.307828 | 4.571476 | 5.259606 |
|      |           |           | 25 C | 3.843163 | 2.287731 | 3.591801 | 5.270562 | 5.687876 |
|      |           |           | 26 H | 3.791578 | 3.022382 | 3.819487 | 5.619233 | 6.131740 |
|      |           |           | 27 C | 4.145072 | 2.281774 | 4.266711 | 5.795457 | 5.960305 |
|      |           |           | 28 C | 1.947925 | 2.106496 | 3.240307 | 4.461118 | 4.276932 |
|      |           |           | 29 O | 2.972257 | 3.015232 | 4.395926 | 5.493556 | 5.163470 |
|      |           |           | 30 C | 3.530833 | 1.837617 | 2.928873 | 3.237225 | 2.832668 |
|      |           |           | 31 O | 4.372199 | 2.985279 | 3.766758 | 3.544108 | 2.846470 |
|      |           |           |      | 6        | 7        | 8        | 9        | 10       |
|      |           |           | 6 H  | 0.000000 |          |          |          |          |
|      |           |           | 7 H  | 1.769229 | 0.000000 |          |          |          |
|      |           |           | 8 H  | 5.120460 | 5.927483 | 0.000000 |          |          |
|      |           |           | 9 C  | 4.653108 | 5.632249 | 1.079226 | 0.000000 |          |
|      |           |           | 10 C | 5.449586 | 6.398000 | 2.235798 | 1.427298 | 0.000000 |
|      |           |           | 11 H | 2.924112 | 4.289717 | 2.681427 | 2.220668 | 3.336914 |
|      |           |           | 12 H | 6.443244 | 7.262085 | 2.683655 | 2.234170 | 1.079567 |
|      |           |           | 13 C | 5.054293 | 6.174883 | 3.350577 | 2.309764 | 1.422242 |
|      |           |           | 14 H | 5.796768 | 6.883022 | 4.361166 | 3.353927 | 2.238402 |
|      |           |           | 15 C | 3.826828 | 5.164414 | 3.339660 | 2.293752 | 2.285755 |
|      |           |           | 16 H | 3.594197 | 5.063612 | 4.347877 | 3.334985 | 3.330341 |
|      |           |           | 17 C | 3.510315 | 4.777847 | 2.220945 | 1.405099 | 2.291748 |
|      |           |           | 18 H | 7.228388 | 6.242670 | 6.774574 | 6.884257 | 6.957307 |
|      |           |           | 19 C | 6.588665 | 5.659125 | 6.548890 | 6.493279 | 6.475238 |
|      |           |           | 20 C | 5.881118 | 4.738747 | 6.960125 | 6.790400 | 6.880315 |
|      |           |           | 21 H | 7.300457 | 6.860829 | 6.087575 | 5.924825 | 5.463224 |
|      |           |           | 22 H | 6.006365 | 4.613652 | 7.543080 | 7.438902 | 7.683476 |
|      |           |           | 23 C | 5.521683 | 4.635799 | 6.925116 | 6.539957 | 6.438702 |
|      |           |           | 24 H | 5.258832 | 4.352424 | 7.431692 | 6.950171 | 6.876761 |
|      |           |           | 25 C | 5.996937 | 5.457025 | 6.432505 | 6.005318 | 5.643712 |
|      |           |           | 26 H | 6.187129 | 5.903695 | 6.558643 | 5.986486 | 5.411971 |
|      |           |           | 27 C | 6.638800 | 6.030697 | 6.196769 | 5.987216 | 5.683094 |
|      |           |           | 28 C | 5.132008 | 5.174266 | 3.170731 | 3.060990 | 3.056948 |
|      |           |           | 29 O | 6.178472 | 6.197250 | 3.278979 | 3.450316 | 3.384943 |
|      |           |           | 30 C | 4.262619 | 3.506086 | 4.445054 | 4.583793 | 5.240697 |
|      |           |           | 31 O | 4.534338 | 3.737953 | 4.632207 | 4.972453 | 5.852469 |
|      |           |           |      | 11       | 12       | 13       | 14       | 15       |
|      |           |           | 11 H | 0.000000 |          |          |          |          |
|      |           |           | 12 H | 4.342933 | 0.000000 |          |          |          |
|      |           |           | 13 C | 3.349803 | 2.236214 | 0.000000 |          |          |
|      |           |           | 14 H | 4.359870 | 2.700304 | 1.079198 | 0.000000 |          |
|      |           |           | 15 C | 2.243088 | 3.330687 | 1.414435 | 2.228915 | 0.000000 |



|    |   |          |          |          |          |          |
|----|---|----------|----------|----------|----------|----------|
| 16 | H | 2.696875 | 4.342869 | 2.225758 | 2.683646 | 1.079686 |
| 17 | C | 1.079079 | 3.331719 | 2.309252 | 3.353186 | 1.432880 |
| 18 | H | 7.637347 | 6.945927 | 7.493995 | 7.934425 | 7.678755 |
| 19 | C | 7.156511 | 6.548606 | 6.834961 | 7.208326 | 6.998538 |
| 20 | C | 7.022228 | 7.156888 | 7.007994 | 7.386903 | 6.930323 |
| 21 | H | 7.166225 | 5.246395 | 5.880849 | 6.043146 | 6.478755 |
| 22 | H | 7.437708 | 8.022582 | 7.816216 | 8.260719 | 7.592520 |
| 23 | C | 6.734049 | 6.776581 | 6.306333 | 6.534697 | 6.258645 |
| 24 | H | 6.854861 | 7.332758 | 6.543267 | 6.726982 | 6.340300 |
| 25 | C | 6.626326 | 5.817225 | 5.570695 | 5.681375 | 5.826035 |
| 26 | H | 6.675126 | 5.572462 | 5.143551 | 5.066644 | 5.525249 |
| 27 | C | 6.906958 | 5.666657 | 5.957083 | 6.177378 | 6.338163 |
| 28 | C | 4.316851 | 3.193647 | 3.759041 | 4.390821 | 4.079567 |
| 29 | O | 5.048092 | 3.176355 | 4.384939 | 4.983870 | 4.899209 |
| 30 | C | 4.656403 | 5.673256 | 5.731972 | 6.511241 | 5.394783 |
| 31 | O | 4.851126 | 6.296864 | 6.451431 | 7.322083 | 6.003119 |
|    |   | 16       | 17       | 18       | 19       | 20       |
| 16 | H | 0.000000 |          |          |          |          |
| 17 | C | 2.242159 | 0.000000 |          |          |          |
| 18 | H | 8.264262 | 7.327256 | 0.000000 |          |          |
| 19 | C | 7.501213 | 6.805532 | 1.079111 | 0.000000 |          |
| 20 | C | 7.247100 | 6.807533 | 2.245366 | 1.434311 | 0.000000 |
| 21 | H | 7.109880 | 6.513243 | 2.675817 | 2.218328 | 3.339618 |
| 22 | H | 7.855636 | 7.366711 | 2.702562 | 2.244756 | 1.079128 |
| 23 | C | 6.446839 | 6.418577 | 3.349648 | 2.307223 | 1.420873 |
| 24 | H | 6.346650 | 6.616516 | 4.360211 | 3.350884 | 2.232000 |
| 25 | C | 6.147775 | 6.099802 | 3.343899 | 2.299437 | 2.294352 |
| 26 | H | 5.778004 | 6.039875 | 4.351072 | 3.340160 | 3.337543 |
| 27 | C | 6.859819 | 6.366838 | 2.222355 | 1.407172 | 2.295536 |
| 28 | C | 4.905243 | 3.710991 | 3.917349 | 3.525688 | 4.122517 |
| 29 | O | 5.824139 | 4.419614 | 3.965480 | 3.848063 | 4.754656 |
| 30 | C | 5.941461 | 4.677479 | 3.371019 | 3.184957 | 3.153875 |
| 31 | O | 6.561300 | 5.067312 | 4.032927 | 4.078857 | 4.050235 |
|    |   | 21       | 22       | 23       | 24       | 25       |
| 21 | H | 0.000000 |          |          |          |          |
| 22 | H | 4.347810 | 0.000000 |          |          |          |
| 23 | C | 3.341163 | 2.233653 | 0.000000 |          |          |
| 24 | H | 4.351388 | 2.689983 | 1.079039 | 0.000000 |          |
| 25 | C | 2.239765 | 3.336958 | 1.413730 | 2.225872 | 0.000000 |
| 26 | H | 2.696136 | 4.346948 | 2.226652 | 2.682432 | 1.078867 |
| 27 | C | 1.079349 | 3.336929 | 2.299234 | 3.342994 | 1.429295 |
| 28 | C | 2.996981 | 4.920011 | 4.099438 | 4.846420 | 3.433858 |
| 29 | O | 3.026911 | 5.539064 | 4.927159 | 5.787072 | 4.149849 |
| 30 | C | 4.336933 | 3.355458 | 3.769071 | 4.352363 | 4.074202 |
| 31 | O | 5.323753 | 4.019158 | 4.815889 | 5.342297 | 5.204202 |
|    |   | 26       | 27       | 28       | 29       | 30       |

|                                                                                   |                                                   |
|-----------------------------------------------------------------------------------|---------------------------------------------------|
|                                                                                   | 26 H 0.000000                                     |
|                                                                                   | 27 C 2.240344 0.000000                            |
|                                                                                   | 28 C 3.755653 3.027179 0.000000                   |
|                                                                                   | 29 O 4.497875 3.382625 1.173488 0.000000          |
|                                                                                   | 30 C 4.859802 3.759920 2.738359 3.347122 0.000000 |
|                                                                                   | 31 O 6.007152 4.804688 3.595319 4.004920 1.147875 |
|                                                                                   | 31                                                |
|                                                                                   | 31 O 0.000000                                     |
| 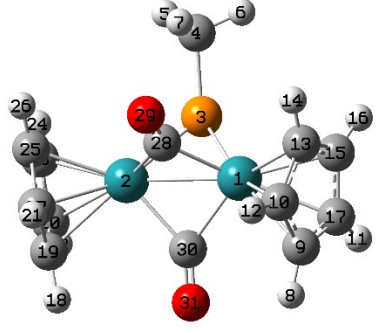 |                                                   |
| 10T. -1184.09086 19.43 C2V                                                        |                                                   |
| WBI 0.34                                                                          |                                                   |
| Charges and spin densities                                                        |                                                   |
|                                                                                   | 1 2 3 4 5                                         |
| 1 Ru 0.272348 0.508359                                                            | 1 Ru 0.000000                                     |
| 2 Ru 0.272454 0.508162                                                            | 2 Ru 2.624446 0.000000                            |
| 3 P -0.119179 0.559733                                                            | 3 P 2.281041 2.281065 0.000000                    |
| 4 C 0.030961 0.046269                                                             | 4 C 3.603954 3.603958 1.838832 0.000000           |
| 9 C 0.030877 -0.011991                                                            | 5 H 4.500360 3.949013 2.439024 1.091915 0.000000  |
| 10 C 0.008443 0.023175                                                            | 6 H 3.949284 4.500441 2.439023 1.091913 1.774785  |
| 13 C -0.017142 0.034281                                                           | 7 H 3.674548 3.674742 2.438125 1.092782 1.779270  |
| 15 C -0.028821 -0.006563                                                          | 8 H 3.011680 4.830990 5.176320 6.603889 7.501278  |
| 17 C -0.032810 0.121161                                                           | 9 C 2.296124 4.545094 4.515374 5.780825 6.740311  |
| 19 C 0.030992 -0.012013                                                           | 10 C 2.275447 4.473363 4.461754 5.375402 6.388018 |
| 20 C -0.032835 0.121463                                                           | 11 H 2.994046 5.217073 4.428422 5.750969 6.627293 |
| 23 C -0.028924 -0.006777                                                          | 12 H 2.999604 4.729279 5.106515 5.934599 6.909363 |
| 25 C -0.016841 0.034286                                                           | 13 C 2.224340 4.630110 3.946458 4.496275 5.572195 |
| 27 C 0.008158 0.023150                                                            | 14 H 2.931646 5.012992 4.237963 4.348078 5.422756 |
| 28 C 0.028962 0.022160                                                            | 15 C 2.215727 4.791880 3.662208 4.411802 5.453154 |
| 29 O -0.207825 0.044842                                                           | 16 H 2.930843 5.308495 3.739699 4.195646 5.203622 |
| 30 C 0.010819 -0.027764                                                           | 17 C 2.271495 4.751676 4.059685 5.266840 6.226181 |
| 31 O -0.209638 0.018067                                                           | 18 H 4.831693 3.011478 5.174975 6.603401 6.826658 |
|                                                                                   | 19 C 4.545564 2.296023 4.514587 5.780543 5.917536 |
|                                                                                   | 20 C 4.752393 2.271653 4.058366 5.264640 5.191712 |
|                                                                                   | 21 H 4.728944 2.999653 5.108008 5.938263 6.224721 |
|                                                                                   | 22 H 5.218278 2.994282 4.426155 5.747177 5.614143 |
|                                                                                   | 23 C 4.791845 2.215843 3.662100 4.410358 4.185009 |
|                                                                                   | 24 H 5.308381 2.931002 3.739512 4.192797 3.715453 |
|                                                                                   | 25 C 4.629431 2.224272 3.947704 4.497914 4.462879 |
|                                                                                   | 26 H 5.011599 2.931436 4.240031 4.351168 4.273426 |
|                                                                                   | 27 C 4.473021 2.275327 4.462494 5.377380 5.549662 |
|                                                                                   | 28 C 2.012345 2.012196 2.621539 3.332272 4.065883 |
|                                                                                   | 29 O 2.999828 2.999772 3.563370 3.774167 4.479889 |
|                                                                                   | 30 C 2.019703 2.019789 3.069312 4.780308 5.375964 |
|                                                                                   | 31 O 3.005934 3.005995 4.153391 5.914546 6.475514 |
|                                                                                   | 6 7 8 9 10                                        |
|                                                                                   | 6 H 0.000000                                      |
|                                                                                   | 7 H 1.779269 0.000000                             |
|                                                                                   | 8 H 6.828084 6.620811 0.000000                    |
|                                                                                   | 9 C 5.918564 5.777307 1.079751 0.000000           |
|                                                                                   | 10 C 5.547857 5.121098 2.224645 1.412493 0.000000 |

|    |   |          |          |          |          |          |
|----|---|----------|----------|----------|----------|----------|
| 11 | H | 5.619363 | 6.128810 | 2.682912 | 2.232748 | 3.341188 |
| 12 | H | 6.221160 | 5.517383 | 2.683235 | 2.227326 | 1.079121 |
| 13 | C | 4.460952 | 4.263338 | 3.338942 | 2.295020 | 1.426556 |
| 14 | H | 4.269276 | 3.912833 | 4.347264 | 3.336945 | 2.236936 |
| 15 | C | 4.186860 | 4.522704 | 3.338263 | 2.296135 | 2.302289 |
| 16 | H | 3.718873 | 4.443654 | 4.347540 | 3.339139 | 3.345963 |
| 17 | C | 5.194891 | 5.474232 | 2.227996 | 1.419929 | 2.299424 |
| 18 | H | 7.500671 | 6.621849 | 5.438202 | 5.749431 | 5.976002 |
| 19 | C | 6.739973 | 5.778103 | 5.748747 | 5.863359 | 5.928723 |
| 20 | C | 6.224022 | 5.472657 | 6.409295 | 6.399200 | 6.543744 |
| 21 | H | 6.912975 | 5.522223 | 5.903529 | 5.898903 | 5.472369 |
| 22 | H | 6.623468 | 6.125883 | 6.713388 | 6.767859 | 7.107146 |
| 23 | C | 5.451873 | 4.520925 | 6.967871 | 6.752982 | 6.646226 |
| 24 | H | 5.201094 | 4.439860 | 7.713716 | 7.410669 | 7.305571 |
| 25 | C | 5.573784 | 4.264776 | 6.729464 | 6.487189 | 6.125887 |
| 26 | H | 5.425713 | 3.915231 | 7.287383 | 6.930558 | 6.369454 |
| 27 | C | 6.389922 | 5.123868 | 5.971083 | 5.925734 | 5.651503 |
| 28 | C | 4.066242 | 2.910912 | 4.373028 | 3.804072 | 3.145807 |
| 29 | O | 4.480288 | 3.030841 | 5.076264 | 4.478911 | 3.502194 |
| 30 | C | 5.376078 | 4.957469 | 3.060709 | 3.045396 | 3.512241 |
| 31 | O | 6.475612 | 6.125785 | 2.920333 | 3.294849 | 4.054965 |
|    |   | 11       | 12       | 13       | 14       | 15       |
| 11 | H | 0.000000 |          |          |          |          |
| 12 | H | 4.350558 | 0.000000 |          |          |          |
| 13 | C | 3.345854 | 2.237194 | 0.000000 |          |          |
| 14 | H | 4.357488 | 2.691781 | 1.079120 | 0.000000 |          |
| 15 | C | 2.237595 | 3.344846 | 1.421771 | 2.236293 | 0.000000 |
| 16 | H | 2.694443 | 4.355411 | 2.234249 | 2.695247 | 1.079120 |
| 17 | C | 1.079176 | 3.342621 | 2.302076 | 3.346175 | 1.423587 |
| 18 | H | 6.707984 | 5.911319 | 6.733432 | 7.293377 | 6.967788 |
| 19 | C | 6.764102 | 5.903511 | 6.489991 | 6.935038 | 6.753063 |
| 20 | C | 6.880599 | 6.708676 | 6.856561 | 7.281451 | 6.905630 |
| 21 | H | 7.370484 | 5.093166 | 6.084413 | 6.274133 | 6.799072 |
| 22 | H | 6.957327 | 7.375732 | 7.410393 | 7.925755 | 7.270590 |
| 23 | C | 7.270784 | 6.798237 | 6.725449 | 6.951388 | 6.878499 |
| 24 | H | 7.694511 | 7.547876 | 7.202256 | 7.366011 | 7.246069 |
| 25 | C | 7.408788 | 6.081358 | 6.282180 | 6.382704 | 6.725705 |
| 26 | H | 7.924327 | 6.267579 | 6.381421 | 6.298163 | 6.951547 |
| 27 | C | 7.103177 | 5.472686 | 6.127915 | 6.373873 | 6.646568 |
| 28 | C | 4.992846 | 3.256698 | 3.153491 | 3.277886 | 3.818861 |
| 29 | O | 5.886806 | 3.335701 | 3.454699 | 3.247673 | 4.425462 |
| 30 | C | 3.727726 | 3.919507 | 4.063693 | 4.826473 | 3.998881 |
| 31 | O | 3.913063 | 4.395182 | 4.839576 | 5.703811 | 4.697893 |
|    |   | 16       | 17       | 18       | 19       | 20       |
| 16 | H | 0.000000 |          |          |          |          |
| 17 | C | 2.234607 | 0.000000 |          |          |          |

|                                                                                     |      |          |          |          |          |          |
|-------------------------------------------------------------------------------------|------|----------|----------|----------|----------|----------|
|                                                                                     | 18 H | 7.712574 | 6.406964 | 0.000000 |          |          |
|                                                                                     | 19 C | 7.410230 | 6.397476 | 1.079779 | 0.000000 |          |
|                                                                                     | 20 C | 7.384823 | 6.638272 | 2.227964 | 1.419905 | 0.000000 |
|                                                                                     | 21 H | 7.549971 | 6.705240 | 2.683345 | 2.227432 | 3.342746 |
|                                                                                     | 22 H | 7.692569 | 6.881562 | 2.682907 | 2.232771 | 1.079199 |
|                                                                                     | 23 C | 7.246214 | 6.905670 | 3.338277 | 2.296132 | 1.423631 |
|                                                                                     | 24 H | 7.464135 | 7.385761 | 4.347571 | 3.339158 | 2.234668 |
|                                                                                     | 25 C | 7.203702 | 6.855103 | 3.338989 | 2.295035 | 2.302113 |
|                                                                                     | 26 H | 7.368255 | 7.279586 | 4.347347 | 3.336992 | 3.346235 |
|                                                                                     | 27 C | 7.306669 | 6.541180 | 2.224727 | 1.412574 | 2.299541 |
|                                                                                     | 28 C | 4.432101 | 4.178857 | 4.375731 | 3.805710 | 4.179024 |
|                                                                                     | 29 O | 5.014574 | 4.969301 | 5.080327 | 4.481396 | 4.969457 |
|                                                                                     | 30 C | 4.734910 | 3.401802 | 3.060158 | 3.045240 | 3.403965 |
|                                                                                     | 31 O | 5.485184 | 3.787489 | 2.918997 | 3.294356 | 3.790483 |
|                                                                                     |      | 21       | 22       | 23       | 24       | 25       |
|                                                                                     | 21 H | 0.000000 |          |          |          |          |
|                                                                                     | 22 H | 4.350711 | 0.000000 |          |          |          |
|                                                                                     | 23 C | 3.344978 | 2.237643 | 0.000000 |          |          |
|                                                                                     | 24 H | 4.355565 | 2.694495 | 1.079144 | 0.000000 |          |
|                                                                                     | 25 C | 2.237334 | 3.345903 | 1.421764 | 2.234259 | 0.000000 |
|                                                                                     | 26 H | 2.691936 | 4.357555 | 2.236298 | 2.695246 | 1.079147 |
|                                                                                     | 27 C | 1.079140 | 3.341334 | 2.302389 | 3.346082 | 1.426627 |
|                                                                                     | 28 C | 3.258846 | 4.993166 | 3.817160 | 4.429370 | 3.151915 |
|                                                                                     | 29 O | 3.339760 | 5.887013 | 4.423077 | 5.010527 | 3.452758 |
|                                                                                     | 30 C | 3.916376 | 3.731358 | 4.000248 | 4.736993 | 4.062893 |
|                                                                                     | 31 O | 4.390343 | 3.918450 | 4.699845 | 5.488257 | 4.838558 |
|                                                                                     |      | 26       | 27       | 28       | 29       | 30       |
|                                                                                     | 26 H | 0.000000 |          |          |          |          |
|                                                                                     | 27 C | 2.237003 | 0.000000 |          |          |          |
|                                                                                     | 28 C | 3.274924 | 3.146751 | 0.000000 |          |          |
|                                                                                     | 29 O | 3.243522 | 3.504102 | 1.172078 | 0.000000 |          |
|                                                                                     | 30 C | 4.824992 | 3.510320 | 2.780162 | 3.870488 | 0.000000 |
|                                                                                     | 31 O | 5.702001 | 4.052145 | 3.858177 | 4.878275 | 1.169646 |
|                                                                                     |      | 31       |          |          |          |          |
|                                                                                     | 31 O | 0.000000 |          |          |          |          |
|                                                                                     |      | 1        | 2        | 3        | 4        | 5        |
|                                                                                     | 1 Ru | 0.000000 |          |          |          |          |
|                                                                                     | 2 Ru | 4.053345 | 0.000000 |          |          |          |
|                                                                                     | 3 P  | 2.219217 | 2.208415 | 0.000000 |          |          |
|                                                                                     | 4 C  | 3.378831 | 3.416954 | 1.842135 | 0.000000 |          |
|                                                                                     | 5 H  | 4.238164 | 3.466418 | 2.444175 | 1.091401 | 0.000000 |
|                                                                                     | 6 H  | 3.296409 | 4.362880 | 2.462366 | 1.088193 | 1.781944 |
|                                                                                     | 7 H  | 3.902246 | 3.687290 | 2.423470 | 1.094222 | 1.763340 |
|                                                                                     | 8 H  | 2.955859 | 6.612677 | 4.731256 | 5.330079 | 5.990766 |
|                                                                                     | 9 C  | 2.234987 | 6.144513 | 4.144656 | 4.691550 | 5.489997 |
|                                                                                     | 10 C | 2.264031 | 6.286702 | 4.438922 | 5.215797 | 6.151639 |
| 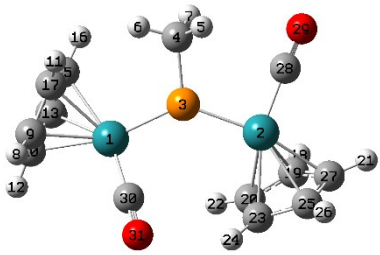 |      |          |          |          |          |          |
| 11T. -1184.084612 23.35 Cs<br>WBI 0.09                                              |      |          |          |          |          |          |

| Charges and spin densities |           |           |      |          |          |          |          |          |
|----------------------------|-----------|-----------|------|----------|----------|----------|----------|----------|
|                            | 1         | 2         |      |          |          |          |          |          |
| 1 Ru                       | 0.391311  | 0.825304  | 11 H | 2.985974 | 5.908745 | 3.745969 | 3.383224 | 4.024771 |
| 2 Ru                       | 0.407504  | 0.866538  | 12 H | 2.993484 | 6.855194 | 5.206630 | 6.178658 | 7.098308 |
| 3 P                        | -0.051183 | 0.067508  | 13 C | 2.283033 | 5.978100 | 4.085613 | 4.613782 | 5.656635 |
| 4 C                        | 0.004530  | -0.000359 | 14 H | 3.004892 | 6.286981 | 4.607133 | 5.179457 | 6.256974 |
| 9 C                        | -0.023472 | 0.017227  | 15 C | 2.267532 | 5.622691 | 3.509541 | 3.532194 | 4.554319 |
| 10 C                       | -0.044955 | -0.034416 | 16 H | 3.006936 | 5.672642 | 3.637336 | 3.224665 | 4.260442 |
| 13 C                       | 0.000445  | 0.114029  | 17 C | 2.254108 | 5.750319 | 3.569908 | 3.609163 | 4.439619 |
| 15 C                       | -0.046521 | -0.030370 | 18 H | 5.510661 | 2.955401 | 4.353002 | 5.496984 | 5.834464 |
| 17 C                       | -0.050608 | 0.021290  | 19 C | 5.118432 | 2.231731 | 3.899184 | 5.237986 | 5.490189 |
| 19 C                       | -0.004617 | -0.000594 | 20 C | 4.136411 | 2.250646 | 3.388948 | 5.057091 | 5.432895 |
| 20 C                       | -0.038067 | 0.047336  | 21 H | 6.857308 | 2.992542 | 5.165509 | 6.129037 | 5.982274 |
| 23 C                       | -0.027227 | -0.042410 | 22 H | 3.597097 | 2.962205 | 3.418204 | 5.133944 | 5.701825 |
| 25 C                       | 0.009793  | 0.113434  | 23 C | 4.490402 | 2.275593 | 3.626683 | 5.303396 | 5.466065 |
| 27 C                       | -0.052802 | -0.022458 | 24 H | 4.343550 | 3.011804 | 3.872159 | 5.604974 | 5.782525 |
| 28 C                       | -0.084784 | 0.001599  | 25 C | 5.600199 | 2.295829 | 4.256636 | 5.646809 | 5.573230 |
| 29 O                       | -0.150328 | 0.022802  | 26 H | 6.310672 | 3.018110 | 4.913628 | 6.177438 | 5.939417 |
| 30 C                       | -0.067210 | 0.009076  | 27 C | 5.924748 | 2.269641 | 4.403754 | 5.610073 | 5.587506 |
| 31 O                       | -0.171808 | 0.024465  | 28 C | 5.045108 | 1.842088 | 2.893487 | 3.049303 | 2.841706 |
|                            |           |           | 29 O | 5.894132 | 2.991040 | 3.764489 | 3.399632 | 3.069033 |
|                            |           |           | 30 C | 1.842075 | 3.949766 | 2.907714 | 4.495582 | 5.065372 |
|                            |           |           | 31 O | 2.991827 | 4.358097 | 3.781110 | 5.411087 | 5.835856 |
|                            |           |           |      | 6        | 7        | 8        | 9        | 10       |
|                            |           |           | 6 H  | 0.000000 |          |          |          |          |
|                            |           |           | 7 H  | 1.776427 | 0.000000 |          |          |          |
|                            |           |           | 8 H  | 4.715867 | 6.082940 | 0.000000 |          |          |
|                            |           |           | 9 C  | 4.086979 | 5.314462 | 1.079305 | 0.000000 |          |
|                            |           |           | 10 C | 4.771759 | 5.621433 | 2.238949 | 1.428065 | 0.000000 |
|                            |           |           | 11 H | 2.447588 | 4.075918 | 2.679810 | 2.227574 | 3.347589 |
|                            |           |           | 12 H | 5.802244 | 6.579860 | 2.697453 | 2.240621 | 1.078942 |
|                            |           |           | 13 C | 4.218350 | 4.769244 | 3.337612 | 2.294905 | 1.414749 |
|                            |           |           | 14 H | 4.915394 | 5.134965 | 4.349661 | 3.339922 | 2.227489 |
|                            |           |           | 15 C | 2.951744 | 3.732980 | 3.338658 | 2.295326 | 2.298637 |
|                            |           |           | 16 H | 2.672168 | 3.152873 | 4.349746 | 3.339326 | 3.339566 |
|                            |           |           | 17 C | 2.846380 | 4.176991 | 2.227988 | 1.417382 | 2.305596 |
|                            |           |           | 18 H | 6.425064 | 5.233608 | 8.402096 | 7.737216 | 7.333887 |
|                            |           |           | 19 C | 6.163765 | 5.189324 | 7.894902 | 7.339624 | 7.065414 |
|                            |           |           | 20 C | 5.824927 | 5.228230 | 6.753662 | 6.282097 | 5.994304 |
|                            |           |           | 21 H | 7.171914 | 6.105052 | 9.480571 | 9.025145 | 8.983684 |
|                            |           |           | 22 H | 5.762527 | 5.274560 | 6.216098 | 5.682036 | 5.200775 |
|                            |           |           | 23 C | 6.047877 | 5.710769 | 6.731115 | 6.464903 | 6.430345 |
|                            |           |           | 24 H | 6.203302 | 6.167283 | 6.187092 | 6.074997 | 6.121006 |
|                            |           |           | 25 C | 6.530747 | 5.982079 | 7.884446 | 7.613125 | 7.677734 |
|                            |           |           | 26 H | 7.038894 | 6.609121 | 8.356339 | 8.195092 | 8.397276 |
|                            |           |           | 27 C | 6.598028 | 5.684216 | 8.523768 | 8.088097 | 8.016669 |
|                            |           |           | 28 C | 4.136662 | 2.934527 | 7.602620 | 7.018475 | 7.229967 |
|                            |           |           | 29 O | 4.445964 | 3.023367 | 8.401119 | 7.767277 | 7.996716 |

|    |   |          |          |          |          |          |
|----|---|----------|----------|----------|----------|----------|
| 30 | C | 4.598676 | 5.187122 | 3.287085 | 3.130133 | 3.259687 |
| 31 | O | 5.567279 | 6.155258 | 3.885085 | 3.988496 | 4.157110 |
|    |   | 11       | 12       | 13       | 14       | 15       |
| 11 | H | 0.000000 |          |          |          |          |
| 12 | H | 4.355652 | 0.000000 |          |          |          |
| 13 | C | 3.345388 | 2.229134 | 0.000000 |          |          |
| 14 | H | 4.355159 | 2.686240 | 1.079947 | 0.000000 |          |
| 15 | C | 2.240809 | 3.341845 | 1.420017 | 2.229692 | 0.000000 |
| 16 | H | 2.703651 | 4.348655 | 2.229828 | 2.680772 | 1.079213 |
| 17 | C | 1.079120 | 3.347679 | 2.301005 | 3.343780 | 1.424500 |
| 18 | H | 7.924342 | 7.682969 | 6.761223 | 6.584873 | 6.833669 |
| 19 | C | 7.561119 | 7.401681 | 6.674174 | 6.650684 | 6.714914 |
| 20 | C | 6.803423 | 6.234520 | 5.824379 | 5.894613 | 6.012357 |
| 21 | H | 8.892475 | 9.400181 | 8.616663 | 8.698686 | 8.422115 |
| 22 | H | 6.463742 | 5.356194 | 5.032724 | 5.015351 | 5.424741 |
| 23 | C | 6.923941 | 6.662906 | 6.500048 | 6.765533 | 6.573830 |
| 24 | H | 6.722808 | 6.267113 | 6.423601 | 6.794766 | 6.559446 |
| 25 | C | 7.762973 | 7.996406 | 7.634876 | 7.893678 | 7.540643 |
| 26 | H | 8.249417 | 8.721888 | 8.447100 | 8.789224 | 8.276481 |
| 27 | C | 8.121481 | 8.389667 | 7.730393 | 7.837875 | 7.619687 |
| 28 | C | 6.257050 | 7.963133 | 6.636454 | 6.893201 | 5.994411 |
| 29 | O | 6.769029 | 8.793463 | 7.269860 | 7.482784 | 6.509077 |
| 30 | C | 4.221499 | 3.512752 | 3.837425 | 4.468375 | 4.054723 |
| 31 | O | 5.147310 | 4.201901 | 4.900864 | 5.500275 | 5.178826 |
|    |   | 16       | 17       | 18       | 19       | 20       |
| 16 | H | 0.000000 |          |          |          |          |
| 17 | C | 2.238452 | 0.000000 |          |          |          |
| 18 | H | 6.762173 | 7.463782 | 0.000000 |          |          |
| 19 | C | 6.765941 | 7.149106 | 1.078867 | 0.000000 |          |
| 20 | C | 6.277099 | 6.308209 | 2.234093 | 1.420430 | 0.000000 |
| 21 | H | 8.370529 | 8.700444 | 2.698200 | 2.240484 | 3.344274 |
| 22 | H | 5.769023 | 5.824303 | 2.691177 | 2.232177 | 1.079411 |
| 23 | C | 6.934562 | 6.569389 | 3.343867 | 2.300823 | 1.420420 |
| 24 | H | 7.068478 | 6.366672 | 4.352255 | 3.342571 | 2.231612 |
| 25 | C | 7.758425 | 7.544410 | 3.339646 | 2.297887 | 2.297102 |
| 26 | H | 8.514311 | 8.135178 | 4.350541 | 3.342156 | 3.340312 |
| 27 | C | 7.669460 | 7.863764 | 2.241296 | 1.429580 | 2.301294 |
| 28 | C | 5.713167 | 6.274445 | 3.480422 | 3.235033 | 3.819554 |
| 29 | O | 6.052837 | 6.870860 | 4.152938 | 4.125062 | 4.874729 |
| 30 | C | 4.841049 | 3.673446 | 5.567179 | 4.891781 | 3.618855 |
| 31 | O | 5.985289 | 4.681932 | 5.970547 | 5.165368 | 3.818317 |
|    |   | 21       | 22       | 23       | 24       | 25       |
| 21 | H | 0.000000 |          |          |          |          |
| 22 | H | 4.355377 | 0.000000 |          |          |          |
| 23 | C | 3.341847 | 2.231564 | 0.000000 |          |          |
| 24 | H | 4.350009 | 2.686647 | 1.078328 | 0.000000 |          |

|                                                                                    |                                                   |
|------------------------------------------------------------------------------------|---------------------------------------------------|
|                                                                                    | 25 C 2.224923 3.340520 1.423229 2.236567 0.000000 |
|                                                                                    | 26 H 2.679399 4.350128 2.233573 2.692010 1.079991 |
|                                                                                    | 27 C 1.079367 3.345441 2.298298 3.339901 1.411067 |
|                                                                                    | 28 C 3.326578 4.441744 4.060258 4.842258 3.701590 |
|                                                                                    | 29 O 3.937938 5.457860 5.185558 5.988424 4.719838 |
|                                                                                    | 30 C 6.497114 3.216532 3.501443 2.976741 4.767052 |
|                                                                                    | 31 O 6.598406 3.556569 3.352391 2.528592 4.623824 |
|                                                                                    | 26 27 28 29 30                                    |
|                                                                                    | 26 H 0.000000                                     |
|                                                                                    | 27 C 2.223182 0.000000                            |
|                                                                                    | 28 C 4.238988 3.162477 0.000000                   |
|                                                                                    | 29 O 5.184607 4.025776 1.150299 0.000000          |
|                                                                                    | 30 C 5.339014 5.469594 5.446310 6.487658 0.000000 |
|                                                                                    | 31 O 5.046639 5.557234 6.023783 7.122960 1.151287 |
|                                                                                    | 31                                                |
|                                                                                    | 31 O 0.000000                                     |
| 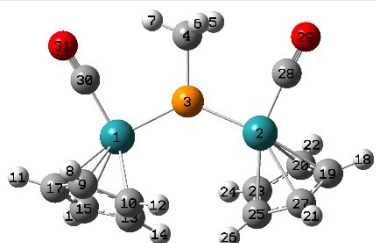 |                                                   |
| 12T. -1184.081055 25.59 C2<br>WBI 0.10                                             |                                                   |
| Charges and spin densities                                                         |                                                   |
| 1 2                                                                                | 1 2 3 4 5                                         |
| 1 Ru 0.379316 0.857109                                                             | 1 Ru 0.000000                                     |
| 2 Ru 0.392377 0.837976                                                             | 2 Ru 4.030697 0.000000                            |
| 3 P -0.041978 0.092047                                                             | 3 P 2.220760 2.223301 0.000000                    |
| 4 C 0.020398 -0.001720                                                             | 4 C 3.451177 3.406090 1.838243 0.000000           |
| 9 C -0.001662 0.000908                                                             | 5 H 4.195454 3.494264 2.424017 1.092106 0.000000  |
| 10 C -0.036688 0.038612                                                            | 6 H 4.114282 3.586259 2.426450 1.093592 1.758061  |
| 13 C -0.048594 -0.041088                                                           | 7 H 3.395395 4.378717 2.476024 1.087546 1.778242  |
| 15 C 0.007205 0.115416                                                             | 8 H 2.952797 5.717563 4.378279 5.420154 6.422047  |
| 17 C -0.054573 -0.028453                                                           | 9 C 2.230904 5.233462 3.921635 5.200656 6.109178  |
| 19 C -0.058604 -0.021272                                                           | 10 C 2.247100 4.196356 3.402999 5.023257 5.797960 |
| 20 C -0.004651 -0.001749                                                           | 11 H 2.992659 6.874719 5.181848 6.151149 6.980774 |
| 23 C -0.041253 0.037135                                                            | 12 H 2.951325 3.732272 3.422500 5.054314 5.811698 |
| 25 C -0.049758 -0.028068                                                           | 13 C 2.276688 4.380161 3.635257 5.335402 5.929333 |
| 27 C 0.001439 0.103712                                                             | 14 H 3.022650 4.152185 3.890828 5.670774 6.103175 |
| 28 C -0.084645 -0.002786                                                           | 15 C 2.298924 5.488801 4.266530 5.704057 6.333999 |
| 29 O -0.151499 0.021574                                                            | 16 H 3.024225 6.130278 4.921600 6.272246 6.785274 |
| 30 C -0.078605 -0.001367                                                           | 17 C 2.270185 5.931753 4.420137 5.627118 6.437765 |
| 31 O -0.148223 0.022016                                                            | 18 H 6.898988 2.985587 5.157708 6.004228 5.705037 |
|                                                                                    | 19 C 5.971863 2.266374 4.409011 5.507850 5.316985 |
|                                                                                    | 20 C 5.301704 2.233881 3.889552 5.024133 4.734517 |
|                                                                                    | 21 H 6.158296 3.021374 4.972460 6.309257 6.474274 |
|                                                                                    | 22 H 5.787331 2.957459 4.318329 5.168615 4.665490 |
|                                                                                    | 23 C 4.294629 2.252290 3.406159 4.928307 4.896049 |
|                                                                                    | 24 H 3.867711 2.960202 3.422929 4.952326 4.933029 |
|                                                                                    | 25 C 4.458312 2.281927 3.685929 5.344828 5.527868 |
|                                                                                    | 26 H 4.244526 3.031239 3.975925 5.754311 6.105127 |
|                                                                                    | 27 C 5.530745 2.294953 4.298551 5.688328 5.765927 |
|                                                                                    | 28 C 5.117027 1.838294 2.919698 3.011274 2.769894 |
|                                                                                    | 29 O 6.025038 2.986609 3.805544 3.361877 2.915036 |

|    |   |          |          |          |          |          |  |  |  |  |
|----|---|----------|----------|----------|----------|----------|--|--|--|--|
| 30 | C | 1.839551 | 5.119899 | 2.928188 | 3.107212 | 3.968520 |  |  |  |  |
| 31 | O | 2.987470 | 6.024653 | 3.816847 | 3.480919 | 4.319182 |  |  |  |  |
|    |   | 6        | 7        | 8        | 9        | 10       |  |  |  |  |
| 6  | H | 0.000000 |          |          |          |          |  |  |  |  |
| 7  | H | 1.777038 | 0.000000 |          |          |          |  |  |  |  |
| 8  | H | 5.564038 | 5.325756 | 0.000000 |          |          |  |  |  |  |
| 9  | C | 5.526849 | 5.156810 | 1.078805 | 0.000000 |          |  |  |  |  |
| 10 | C | 5.368015 | 5.255090 | 2.232789 | 1.419453 | 0.000000 |  |  |  |  |
| 11 | H | 6.703666 | 5.752931 | 2.697437 | 2.239979 | 3.343768 |  |  |  |  |
| 12 | H | 5.221258 | 5.467465 | 2.686162 | 2.228948 | 1.079251 |  |  |  |  |
| 13 | C | 5.916332 | 5.534926 | 3.342805 | 2.299664 | 1.421558 |  |  |  |  |
| 14 | H | 6.284828 | 6.008500 | 4.353612 | 3.342926 | 2.237098 |  |  |  |  |
| 15 | C | 6.389137 | 5.633243 | 3.339696 | 2.298085 | 2.298609 |  |  |  |  |
| 16 | H | 7.068668 | 6.137156 | 4.350349 | 3.342242 | 3.342102 |  |  |  |  |
| 17 | C | 6.172054 | 5.407621 | 2.240894 | 1.429258 | 2.301018 |  |  |  |  |
| 18 | H | 6.049047 | 7.051165 | 8.468421 | 7.955744 | 6.719543 |  |  |  |  |
| 19 | C | 5.672901 | 6.506264 | 7.583003 | 7.004589 | 5.737919 |  |  |  |  |
| 20 | C | 5.455397 | 5.917585 | 7.366387 | 6.653521 | 5.448242 |  |  |  |  |
| 21 | H | 6.254432 | 7.262522 | 6.877823 | 6.463359 | 5.155142 |  |  |  |  |
| 22 | H | 5.686615 | 6.018931 | 8.111123 | 7.374560 | 6.254679 |  |  |  |  |
| 23 | C | 5.460037 | 5.686909 | 6.279519 | 5.476432 | 4.228744 |  |  |  |  |
| 24 | H | 5.658599 | 5.542775 | 6.120664 | 5.211030 | 4.081528 |  |  |  |  |
| 25 | C | 5.659999 | 6.142725 | 5.777567 | 5.084901 | 3.711191 |  |  |  |  |
| 26 | H | 6.061647 | 6.441574 | 5.135772 | 4.431155 | 3.013126 |  |  |  |  |
| 27 | C | 5.793283 | 6.631094 | 6.683631 | 6.143916 | 4.811333 |  |  |  |  |
| 28 | C | 2.874658 | 4.097017 | 6.822302 | 6.513157 | 5.709370 |  |  |  |  |
| 29 | O | 3.047379 | 4.386592 | 7.713666 | 7.479861 | 6.772315 |  |  |  |  |
| 30 | C | 3.710313 | 2.502204 | 3.431078 | 3.196944 | 3.793163 |  |  |  |  |
| 31 | O | 3.953623 | 2.604511 | 4.076847 | 4.067138 | 4.837867 |  |  |  |  |
|    |   | 11       | 12       | 13       | 14       | 15       |  |  |  |  |
| 11 | H | 0.000000 |          |          |          |          |  |  |  |  |
| 12 | H | 4.353242 | 0.000000 |          |          |          |  |  |  |  |
| 13 | C | 3.340208 | 2.235451 | 0.000000 |          |          |  |  |  |  |
| 14 | H | 4.344591 | 2.699919 | 1.077980 | 0.000000 |          |  |  |  |  |
| 15 | C | 2.224519 | 3.342848 | 1.422645 | 2.229915 | 0.000000 |  |  |  |  |
| 16 | H | 2.678680 | 4.353324 | 2.233857 | 2.683588 | 1.079977 |  |  |  |  |
| 17 | C | 1.079345 | 3.344051 | 2.296642 | 3.335457 | 1.410882 |  |  |  |  |
| 18 | H | 9.646309 | 6.091197 | 6.717571 | 6.117609 | 7.967719 |  |  |  |  |
| 19 | C | 8.653665 | 5.170106 | 5.662480 | 5.040301 | 6.918651 |  |  |  |  |
| 20 | C | 8.008882 | 5.140459 | 5.082007 | 4.407654 | 6.183466 |  |  |  |  |
| 21 | H | 8.438867 | 4.293097 | 5.455685 | 4.963462 | 6.858305 |  |  |  |  |
| 22 | H | 8.539536 | 6.050631 | 5.777976 | 5.111185 | 6.734723 |  |  |  |  |
| 23 | C | 6.787192 | 4.045502 | 3.723917 | 2.993444 | 4.861824 |  |  |  |  |
| 24 | H | 6.201521 | 4.178978 | 3.267134 | 2.510601 | 4.195795 |  |  |  |  |
| 25 | C | 6.743629 | 3.228566 | 3.559139 | 2.908387 | 4.915261 |  |  |  |  |
| 26 | H | 6.142736 | 2.526057 | 2.923233 | 2.325966 | 4.337034 |  |  |  |  |



|    |   |          |          |          |          |          |
|----|---|----------|----------|----------|----------|----------|
| 27 | C | 7.962436 | 4.111752 | 4.896185 | 4.319795 | 6.261454 |
| 28 | C | 8.058091 | 5.249807 | 6.010006 | 5.893093 | 6.956730 |
| 29 | O | 8.957011 | 6.319712 | 7.101826 | 7.014246 | 7.979690 |
| 30 | C | 3.293042 | 4.407194 | 4.051087 | 4.850834 | 3.691694 |
| 31 | O | 3.873026 | 5.415004 | 5.168510 | 5.993457 | 4.695962 |
|    |   | 16       | 17       | 18       | 19       | 20       |
| 16 | H | 0.000000 |          |          |          |          |
| 17 | C | 2.222906 | 0.000000 |          |          |          |
| 18 | H | 8.469208 | 8.641564 | 0.000000 |          |          |
| 19 | C | 7.412764 | 7.637869 | 1.079415 | 0.000000 |          |
| 20 | C | 6.522025 | 7.040882 | 2.238535 | 1.428277 | 0.000000 |
| 21 | H | 7.557831 | 7.379713 | 2.678240 | 2.223240 | 3.343121 |
| 22 | H | 6.951517 | 7.632619 | 2.696980 | 2.240803 | 1.078657 |
| 23 | C | 5.215287 | 5.792175 | 3.341906 | 2.298929 | 1.420364 |
| 24 | H | 4.380952 | 5.265434 | 4.350714 | 3.341503 | 2.228149 |
| 25 | C | 5.480917 | 5.681857 | 3.340380 | 2.296787 | 2.301171 |
| 26 | H | 4.976894 | 5.064226 | 4.344893 | 3.335737 | 3.344631 |
| 27 | C | 6.873945 | 6.906607 | 2.224404 | 1.411297 | 2.299355 |
| 28 | C | 7.577351 | 7.231020 | 3.253689 | 3.112924 | 3.234204 |
| 29 | O | 8.578912 | 8.190436 | 3.820674 | 3.948931 | 4.114239 |
| 30 | C | 4.240905 | 3.132843 | 8.073275 | 7.268616 | 6.606293 |
| 31 | O | 5.173814 | 3.973539 | 8.962801 | 8.221805 | 7.578560 |
|    |   | 21       | 22       | 23       | 24       | 25       |
| 21 | H | 0.000000 |          |          |          |          |
| 22 | H | 4.351263 | 0.000000 |          |          |          |
| 23 | C | 3.341198 | 2.233862 | 0.000000 |          |          |
| 24 | H | 4.353145 | 2.684930 | 1.079306 | 0.000000 |          |
| 25 | C | 2.235508 | 3.343846 | 1.419967 | 2.234392 | 0.000000 |
| 26 | H | 2.685581 | 4.354741 | 2.236344 | 2.699908 | 1.078156 |
| 27 | C | 1.079859 | 3.341039 | 2.297570 | 3.342256 | 1.423739 |
| 28 | C | 4.174903 | 3.496867 | 3.830444 | 4.468162 | 4.048343 |
| 29 | O | 5.086355 | 4.165116 | 4.885154 | 5.494346 | 5.164447 |
| 30 | C | 7.570628 | 6.934896 | 5.831382 | 5.428504 | 6.082868 |
| 31 | O | 8.551447 | 7.840476 | 6.898679 | 6.509580 | 7.168103 |
|    |   | 26       | 27       | 28       | 29       | 30       |
| 26 | H | 0.000000 |          |          |          |          |
| 27 | C | 2.230910 | 0.000000 |          |          |          |
| 28 | C | 4.846557 | 3.650459 | 0.000000 |          |          |
| 29 | O | 5.986182 | 4.644478 | 1.150482 | 0.000000 |          |
| 30 | C | 5.971704 | 6.980472 | 5.664519 | 6.315699 | 0.000000 |
| 31 | O | 7.083765 | 7.990570 | 6.311921 | 6.807132 | 1.150055 |
|    |   | 31       |          |          |          |          |
| 31 | O | 0.000000 |          |          |          |          |

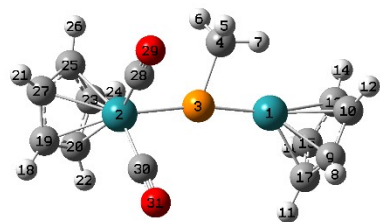

13S. -1184.07395 30.04 C1  
WBI 0.07

Charges and spin densities

1

|      |           |
|------|-----------|
| 1 Ru | 0.365383  |
| 2 Ru | 0.325134  |
| 3 P  | -0.170619 |
| 4 C  | 0.022329  |
| 9 C  | -0.066723 |
| 10 C | -0.055294 |
| 13 C | -0.053279 |
| 15 C | -0.069982 |
| 17 C | -0.084241 |
| 19 C | -0.005378 |
| 20 C | 0.001777  |
| 23 C | 0.053426  |
| 25 C | -0.015998 |
| 27 C | -0.003916 |
| 28 C | -0.033987 |
| 29 O | -0.109720 |
| 30 C | 0.004009  |
| 31 O | -0.102919 |

|      | 1        | 2        | 3        | 4        | 5        |
|------|----------|----------|----------|----------|----------|
| 1 Ru | 0.000000 |          |          |          |          |
| 2 Ru | 4.482039 | 0.000000 |          |          |          |
| 3 P  | 2.138701 | 2.362728 | 0.000000 |          |          |
| 4 C  | 2.494333 | 3.550277 | 1.862833 | 0.000000 |          |
| 5 H  | 3.218679 | 3.793458 | 2.511265 | 1.090134 | 0.000000 |
| 6 H  | 3.242908 | 3.793088 | 2.509120 | 1.090873 | 1.794007 |
| 7 H  | 2.007915 | 4.540949 | 2.475188 | 1.138666 | 1.765682 |
| 8 H  | 2.873370 | 6.185891 | 4.273530 | 4.877158 | 5.116695 |
| 9 C  | 2.127010 | 6.056868 | 3.918112 | 4.392413 | 4.814560 |
| 10 C | 2.163909 | 6.503989 | 4.191548 | 4.045809 | 4.441528 |
| 11 H | 2.853361 | 5.850133 | 4.086825 | 5.227067 | 5.926810 |
| 12 H | 2.923336 | 6.989250 | 4.736420 | 4.269997 | 4.429888 |
| 13 C | 2.179505 | 6.612921 | 4.263234 | 4.059949 | 4.730876 |
| 14 H | 2.937880 | 7.169852 | 4.846276 | 4.283498 | 4.951279 |
| 15 C | 2.148062 | 6.240513 | 4.036441 | 4.406042 | 5.234545 |
| 16 H | 2.901828 | 6.519404 | 4.474943 | 4.899287 | 5.842237 |
| 17 C | 2.103233 | 5.866261 | 3.799880 | 4.590827 | 5.274480 |
| 18 H | 7.095974 | 2.985360 | 5.131074 | 6.469581 | 6.756538 |
| 19 C | 6.372381 | 2.264258 | 4.368093 | 5.580613 | 5.928447 |
| 20 C | 5.448810 | 2.262646 | 3.661524 | 4.985265 | 5.571569 |
| 21 H | 7.311544 | 2.987951 | 5.184524 | 5.785439 | 5.812717 |
| 22 H | 5.461728 | 2.991344 | 3.960413 | 5.480691 | 6.162584 |
| 23 C | 4.983232 | 2.277739 | 3.217293 | 4.086836 | 4.733736 |
| 24 H | 4.493307 | 2.980634 | 3.094859 | 3.777756 | 4.608701 |
| 25 C | 5.685818 | 2.262880 | 3.723086 | 4.200734 | 4.566417 |
| 26 H | 5.907546 | 2.995894 | 4.073827 | 4.056754 | 4.330787 |
| 27 C | 6.499985 | 2.266525 | 4.401745 | 5.170521 | 5.376416 |
| 28 C | 4.867146 | 1.857230 | 2.944621 | 3.370659 | 3.044154 |
| 29 O | 5.434258 | 2.999334 | 3.754458 | 3.755704 | 3.101575 |
| 30 C | 4.628633 | 1.862119 | 2.926376 | 4.491120 | 4.626959 |
| 31 O | 5.090249 | 3.002421 | 3.734709 | 5.334500 | 5.421475 |
|      | 6        | 7        | 8        | 9        | 10       |
| 6 H  | 0.000000 |          |          |          |          |
| 7 H  | 1.758700 | 0.000000 |          |          |          |
| 8 H  | 5.855778 | 4.376558 | 0.000000 |          |          |
| 9 C  | 5.268606 | 3.752139 | 1.079194 | 0.000000 |          |
| 10 C | 4.820376 | 3.124094 | 2.235532 | 1.423590 | 0.000000 |
| 11 H | 5.904084 | 4.857632 | 2.704232 | 2.244547 | 3.351973 |
| 12 H | 5.070898 | 3.312301 | 2.691604 | 2.235109 | 1.079437 |
| 13 C | 4.560435 | 3.078355 | 3.354044 | 2.310687 | 1.431535 |
| 14 H | 4.582776 | 3.218665 | 4.362858 | 3.353057 | 2.242000 |
| 15 C | 4.871549 | 3.682739 | 3.362033 | 2.318279 | 2.310539 |
| 16 H | 5.165695 | 4.263268 | 4.373050 | 3.361861 | 3.353764 |
| 17 C | 5.287276 | 4.045322 | 2.245228 | 1.432942 | 2.309163 |
| 18 H | 6.528894 | 7.433679 | 8.526100 | 8.474367 | 9.156519 |

|    |   |          |          |          |          |          |
|----|---|----------|----------|----------|----------|----------|
| 19 | C | 5.544901 | 6.559055 | 8.088425 | 7.931057 | 8.484815 |
| 20 | C | 4.912387 | 5.825135 | 7.365093 | 7.064701 | 7.595082 |
| 21 | H | 5.606513 | 6.904753 | 9.139345 | 9.013957 | 9.337305 |
| 22 | H | 5.492395 | 6.178038 | 7.194521 | 6.886990 | 7.547277 |
| 23 | C | 3.776216 | 4.951892 | 7.308746 | 6.870886 | 7.138524 |
| 24 | H | 3.352492 | 4.466897 | 7.034552 | 6.456050 | 6.602641 |
| 25 | C | 3.810409 | 5.235327 | 7.968711 | 7.613799 | 7.779533 |
| 26 | H | 3.467301 | 5.088476 | 8.329659 | 7.923611 | 7.901402 |
| 27 | C | 4.985690 | 6.247789 | 8.434221 | 8.238906 | 8.588505 |
| 28 | C | 3.773307 | 4.412576 | 6.278869 | 6.299638 | 6.563188 |
| 29 | O | 4.196012 | 4.724770 | 6.625989 | 6.728706 | 6.876425 |
| 30 | C | 5.081639 | 5.261731 | 5.440129 | 5.597646 | 6.391834 |
| 31 | O | 6.037993 | 5.977282 | 5.294161 | 5.638749 | 6.616454 |
|    |   | 11       | 12       | 13       | 14       | 15       |
| 11 | H | 0.000000 |          |          |          |          |
| 12 | H | 4.362739 | 0.000000 |          |          |          |
| 13 | C | 3.349572 | 2.243002 | 0.000000 |          |          |
| 14 | H | 4.360172 | 2.698791 | 1.079672 | 0.000000 |          |
| 15 | C | 2.246125 | 3.352452 | 1.419126 | 2.230056 | 0.000000 |
| 16 | H | 2.705791 | 4.361900 | 2.231479 | 2.685540 | 1.079269 |
| 17 | C | 1.079171 | 3.352953 | 2.307229 | 3.351084 | 1.434804 |
| 18 | H | 7.654146 | 9.766908 | 9.162021 | 9.768108 | 8.481221 |
| 19 | C | 7.213958 | 9.086833 | 8.405516 | 8.937692 | 7.789612 |
| 20 | C | 6.163465 | 8.301465 | 7.348118 | 7.862668 | 6.625181 |
| 21 | H | 8.768727 | 9.731150 | 9.352888 | 9.748632 | 9.034813 |
| 22 | H | 5.671939 | 8.351975 | 7.251670 | 7.835418 | 6.350233 |
| 23 | C | 6.267041 | 7.776601 | 6.774217 | 7.125954 | 6.240460 |
| 24 | H | 5.840006 | 7.285484 | 6.060046 | 6.324648 | 5.522793 |
| 25 | C | 7.324942 | 8.263423 | 7.549607 | 7.840165 | 7.223591 |
| 26 | H | 7.867613 | 8.287140 | 7.639403 | 7.798595 | 7.489384 |
| 27 | C | 7.854108 | 9.067194 | 8.516036 | 8.927035 | 8.111243 |
| 28 | C | 6.711351 | 6.767101 | 6.945327 | 7.441387 | 6.925894 |
| 29 | O | 7.444471 | 6.903611 | 7.396926 | 7.842504 | 7.564119 |
| 30 | C | 5.282787 | 6.896929 | 6.777934 | 7.552624 | 6.287918 |
| 31 | O | 5.257708 | 7.117184 | 7.146347 | 8.019116 | 6.602345 |
|    |   | 16       | 17       | 18       | 19       | 20       |
| 16 | H | 0.000000 |          |          |          |          |
| 17 | C | 2.246917 | 0.000000 |          |          |          |
| 18 | H | 8.536995 | 8.010869 | 0.000000 |          |          |
| 19 | C | 7.822900 | 7.459976 | 1.079465 | 0.000000 |          |
| 20 | C | 6.547393 | 6.415782 | 2.241010 | 1.430202 | 0.000000 |
| 21 | H | 9.176332 | 8.805453 | 2.679692 | 2.224207 | 3.344440 |
| 22 | H | 6.191362 | 6.077334 | 2.702213 | 2.244231 | 1.078955 |
| 23 | C | 6.148372 | 6.291229 | 3.341276 | 2.298625 | 1.415958 |
| 24 | H | 5.327013 | 5.780308 | 4.349949 | 3.341135 | 2.223806 |
| 25 | C | 7.249380 | 7.251925 | 3.342628 | 2.298269 | 2.297030 |

|  |      |          |          |          |          |          |
|--|------|----------|----------|----------|----------|----------|
|  | 26 H | 7.532208 | 7.658164 | 4.351338 | 3.340236 | 3.339455 |
|  | 27 C | 8.195652 | 7.918030 | 2.223760 | 1.410981 | 2.300273 |
|  | 28 C | 7.417999 | 6.520785 | 4.302543 | 3.736762 | 4.069820 |
|  | 29 O | 8.149049 | 7.157451 | 5.268246 | 4.768492 | 5.194833 |
|  | 30 C | 6.711843 | 5.507204 | 3.332397 | 3.169476 | 3.247617 |
|  | 31 O | 7.089169 | 5.611929 | 3.957288 | 4.040013 | 4.143860 |
|  |      | 21       | 22       | 23       | 24       | 25       |
|  | 21 H | 0.000000 |          |          |          |          |
|  | 22 H | 4.354046 | 0.000000 |          |          |          |
|  | 23 C | 3.342941 | 2.227723 | 0.000000 |          |          |
|  | 24 H | 4.354650 | 2.676739 | 1.079348 | 0.000000 |          |
|  | 25 C | 2.241798 | 3.338927 | 1.416666 | 2.229718 | 0.000000 |
|  | 26 H | 2.700140 | 4.347359 | 2.229839 | 2.688115 | 1.079005 |
|  | 27 C | 1.079341 | 3.342859 | 2.300163 | 3.344666 | 1.430277 |
|  | 28 C | 3.382069 | 4.847264 | 3.809929 | 4.395685 | 3.238013 |
|  | 29 O | 4.030314 | 5.988705 | 4.860220 | 5.397860 | 4.135449 |
|  | 30 C | 4.257520 | 3.485312 | 3.831680 | 4.432717 | 4.068263 |
|  | 31 O | 5.201197 | 4.169934 | 4.884706 | 5.444867 | 5.188466 |
|  |      | 26       | 27       | 28       | 29       | 30       |
|  | 26 H | 0.000000 |          |          |          |          |
|  | 27 C | 2.242149 | 0.000000 |          |          |          |
|  | 28 C | 3.468400 | 3.200269 | 0.000000 |          |          |
|  | 29 O | 4.147721 | 4.084204 | 1.142323 | 0.000000 |          |
|  | 30 C | 4.852608 | 3.707497 | 2.631505 | 3.542719 | 0.000000 |
|  | 31 O | 5.990282 | 4.724764 | 3.544099 | 4.276178 | 1.140649 |
|  |      | 31       |          |          |          |          |
|  | 31 O | 0.000000 |          |          |          |          |

Table S5. Distance matrix for the lowest energy MePCp<sub>2</sub>Ru<sub>2</sub>(CO)<sub>3</sub> structures as optimized at the PBE0/def2TZVP level. Included are the ranking order, spin multiplicity (S, T or Q), total energy (in a.u.), relative energy (in kcal/mol), symmetry point group Wiberg bond indices for the Fe-Fe bonds, Mulliken charges and the spin density (Cp moieties are omitted for clarity).

|                                                                                                                                 |      |          |          |          |          |          |  |
|---------------------------------------------------------------------------------------------------------------------------------|------|----------|----------|----------|----------|----------|--|
| 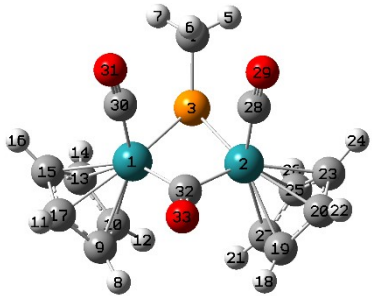 <p>1S -1297.415564 0.00 Cs<br/>WBI 0.33</p> |      | 1        | 2        | 3        | 4        | 5        |  |
|                                                                                                                                 | 1 Ru | 0.000000 |          |          |          |          |  |
|                                                                                                                                 | 2 Ru | 2.761340 | 0.000000 |          |          |          |  |
|                                                                                                                                 | 3 P  | 2.346915 | 2.348805 | 0.000000 |          |          |  |
|                                                                                                                                 | 4 C  | 3.522091 | 3.521487 | 1.853592 | 0.000000 |          |  |
|                                                                                                                                 | 5 H  | 4.441047 | 3.854754 | 2.420200 | 1.094116 | 0.000000 |  |
|                                                                                                                                 | 6 H  | 3.623915 | 3.623841 | 2.540749 | 1.089249 | 1.774185 |  |
|                                                                                                                                 | 7 H  | 3.856013 | 4.440651 | 2.418758 | 1.094121 | 1.758986 |  |
|                                                                                                                                 | 8 H  | 3.002026 | 4.262170 | 4.861655 | 6.408976 | 7.196276 |  |
|                                                                                                                                 | 9 C  | 2.283073 | 4.135310 | 4.212836 | 5.704900 | 6.552796 |  |
|                                                                                                                                 | 10 C | 2.294835 | 3.970920 | 3.487154 | 5.123903 | 5.875661 |  |
|                                                                                                                                 | 11 H | 2.966741 | 5.335229 | 5.286246 | 6.243526 | 7.262826 |  |

|                  |      |          |          |          |          |          |
|------------------|------|----------|----------|----------|----------|----------|
| Charge densities | 12 H | 3.033379 | 3.981160 | 3.633672 | 5.418048 | 6.006936 |
| 1                | 13 C | 2.273968 | 4.513116 | 3.309778 | 4.606861 | 5.458004 |
| 1 Ru 0.300802    | 14 H | 2.988037 | 4.936427 | 3.284269 | 4.431728 | 5.186757 |
| 2 Ru 0.315585    | 15 C | 2.212920 | 4.922580 | 3.941451 | 4.904206 | 5.904964 |
| 3 P -0.087519    | 16 H | 2.929918 | 5.661191 | 4.443051 | 5.037453 | 6.079901 |
| 4 C -0.023375    | 17 C | 2.252744 | 4.740172 | 4.471084 | 5.603857 | 6.587970 |
| 9 C 0.014061     | 18 H | 4.460088 | 3.001125 | 5.039468 | 6.484538 | 6.831581 |
| 10 C 0.006208    | 19 C | 4.247780 | 2.284618 | 4.328418 | 5.754444 | 5.983139 |
| 13 C 0.030560    | 20 C | 4.819663 | 2.242270 | 4.433441 | 5.501884 | 5.538873 |
| 15 C -0.031213   | 21 H | 3.944979 | 3.049147 | 3.893963 | 5.684972 | 5.969342 |
| 17 C 0.016254    | 22 H | 5.470687 | 2.955321 | 5.222143 | 6.068728 | 6.090452 |
| 19 C 0.016911    | 23 C | 4.884599 | 2.213053 | 3.808434 | 4.787990 | 4.609168 |
| 20 C 0.004611    | 24 H | 5.599518 | 2.933000 | 4.213494 | 4.821365 | 4.420272 |
| 23 C -0.031865   | 25 C | 4.404098 | 2.282060 | 3.281120 | 4.663223 | 4.587196 |
| 25 C 0.052711    | 26 H | 4.737443 | 2.994395 | 3.209410 | 4.527586 | 4.325026 |
| 27 C -0.007776   | 27 C | 3.947215 | 2.300088 | 3.630118 | 5.269378 | 5.457289 |
| 28 C -0.042015   | 28 C | 3.536871 | 1.836386 | 2.987627 | 3.103269 | 3.364248 |
| 29 O -0.129050   | 29 O | 4.393952 | 2.981580 | 3.833177 | 3.405648 | 3.566332 |
| 30 C -0.041499   | 30 C | 1.837062 | 3.533490 | 2.993460 | 3.114233 | 4.149738 |
| 31 O -0.129387   | 31 O | 2.982414 | 4.388243 | 3.839681 | 3.419293 | 4.411579 |
| 32 C -0.023989   | 32 C | 2.023672 | 2.023183 | 3.342280 | 4.387648 | 5.096043 |
| 33 O -0.210017   | 33 O | 2.985877 | 2.990010 | 4.510917 | 5.447792 | 6.155193 |
|                  | 6    | 7        | 8        | 9        | 10       |          |
|                  | 6 H  | 0.000000 |          |          |          |          |
|                  | 7 H  | 1.774033 | 0.000000 |          |          |          |
|                  | 8 H  | 6.543986 | 6.779570 | 0.000000 |          |          |
|                  | 9 C  | 5.902107 | 5.947395 | 1.079744 | 0.000000 |          |
|                  | 10 C | 5.572442 | 5.275951 | 2.235741 | 1.424007 | 0.000000 |
|                  | 11 H | 6.128182 | 6.342779 | 2.679520 | 2.227649 | 3.344922 |
|                  | 12 H | 5.989889 | 5.643527 | 2.697316 | 2.238611 | 1.078157 |
|                  | 13 C | 5.088758 | 4.484339 | 3.340639 | 2.297884 | 1.415523 |
|                  | 14 H | 5.088364 | 4.130957 | 4.350046 | 3.340851 | 2.227651 |
|                  | 15 C | 5.108908 | 4.749172 | 3.334407 | 2.290297 | 2.290559 |
|                  | 16 H | 5.168202 | 4.692530 | 4.343826 | 3.333052 | 3.333471 |
|                  | 17 C | 5.657171 | 5.685648 | 2.220892 | 1.411687 | 2.301077 |
|                  | 18 H | 6.545979 | 7.322069 | 3.654888 | 4.279735 | 4.617206 |
|                  | 19 C | 5.907024 | 6.631192 | 4.086118 | 4.480992 | 4.517258 |
|                  | 20 C | 5.555807 | 6.502202 | 5.292796 | 5.570904 | 5.545104 |
|                  | 21 H | 6.181830 | 6.294964 | 3.537992 | 3.681808 | 3.150629 |
|                  | 22 H | 5.951490 | 7.113476 | 5.915276 | 6.267692 | 6.409818 |
|                  | 23 C | 5.045536 | 5.772774 | 5.872135 | 5.926859 | 5.562310 |
|                  | 24 H | 5.051347 | 5.833748 | 6.880156 | 6.869797 | 6.451479 |
|                  | 25 C | 5.165791 | 5.484584 | 5.221278 | 5.185790 | 4.574754 |
|                  | 26 H | 5.221908 | 5.223842 | 5.777036 | 5.588226 | 4.725697 |
|                  | 27 C | 5.676196 | 6.028229 | 4.018574 | 4.174368 | 3.775714 |
|                  | 28 C | 2.704492 | 4.140296 | 5.599056 | 5.394811 | 5.385625 |

|  |    |   |          |          |          |          |          |  |  |
|--|----|---|----------|----------|----------|----------|----------|--|--|
|  | 29 | O | 2.716382 | 4.399790 | 6.576824 | 6.353475 | 6.406065 |  |  |
|  | 30 | C | 2.711990 | 3.379387 | 4.509089 | 3.852223 | 4.054767 |  |  |
|  | 31 | O | 2.726062 | 3.586819 | 5.538991 | 4.909610 | 5.169842 |  |  |
|  | 32 | C | 4.182777 | 5.096813 | 3.063128 | 3.043418 | 3.571455 |  |  |
|  | 33 | O | 5.106498 | 6.154676 | 3.195657 | 3.465470 | 4.330302 |  |  |
|  |    |   | 11       | 12       | 13       | 14       | 15       |  |  |
|  | 11 | H | 0.000000 |          |          |          |          |  |  |
|  | 12 | H | 4.353895 | 0.000000 |          |          |          |  |  |
|  | 13 | C | 3.352308 | 2.222944 | 0.000000 |          |          |  |  |
|  | 14 | H | 4.362675 | 2.676854 | 1.078668 | 0.000000 |          |  |  |
|  | 15 | C | 2.243849 | 3.331608 | 1.419881 | 2.233445 | 0.000000 |  |  |
|  | 16 | H | 2.700192 | 4.340425 | 2.230697 | 2.689098 | 1.079556 |  |  |
|  | 17 | C | 1.078796 | 3.342895 | 2.309932 | 3.353237 | 1.430412 |  |  |
|  | 18 | H | 5.748875 | 4.385054 | 5.794619 | 6.502145 | 6.158056 |  |  |
|  | 19 | C | 6.069061 | 4.185590 | 5.589275 | 6.152845 | 6.110665 |  |  |
|  | 20 | C | 6.943250 | 5.267203 | 6.421063 | 6.880982 | 6.900805 |  |  |
|  | 21 | H | 5.774503 | 2.399676 | 4.321672 | 4.717166 | 5.250509 |  |  |
|  | 22 | H | 7.411153 | 6.222278 | 7.261088 | 7.775816 | 7.595106 |  |  |
|  | 23 | C | 7.423747 | 5.179544 | 6.263506 | 6.503164 | 6.939022 |  |  |
|  | 24 | H | 8.261425 | 6.091530 | 7.014556 | 7.154312 | 7.680805 |  |  |
|  | 25 | C | 6.951765 | 4.022398 | 5.324699 | 5.483522 | 6.213071 |  |  |
|  | 26 | H | 7.402883 | 4.089790 | 5.303836 | 5.249589 | 6.349593 |  |  |
|  | 27 | C | 6.063611 | 3.211564 | 4.814431 | 5.203767 | 5.624728 |  |  |
|  | 28 | C | 5.986567 | 5.606260 | 5.594095 | 5.958129 | 5.691172 |  |  |
|  | 29 | O | 6.662646 | 6.695832 | 6.482920 | 6.811539 | 6.440682 |  |  |
|  | 30 | C | 3.498733 | 4.846613 | 3.624187 | 4.133067 | 3.041732 |  |  |
|  | 31 | O | 4.181900 | 5.982748 | 4.621081 | 5.043960 | 3.889640 |  |  |
|  | 32 | C | 3.655394 | 4.019252 | 4.123896 | 4.903176 | 3.987806 |  |  |
|  | 33 | O | 3.694068 | 4.810628 | 4.972831 | 5.855259 | 4.630988 |  |  |
|  |    |   | 16       | 17       | 18       | 19       | 20       |  |  |
|  | 16 | H | 0.000000 |          |          |          |          |  |  |
|  | 17 | C | 2.240235 | 0.000000 |          |          |          |  |  |
|  | 18 | H | 7.127289 | 5.350489 | 0.000000 |          |          |  |  |
|  | 19 | C | 7.052751 | 5.534257 | 1.079588 | 0.000000 |          |  |  |
|  | 20 | C | 7.739897 | 6.449451 | 2.219016 | 1.408773 | 0.000000 |  |  |
|  | 21 | H | 6.265571 | 4.950569 | 2.693821 | 2.235988 | 3.337496 |  |  |
|  | 22 | H | 8.389824 | 7.048985 | 2.676727 | 2.224247 | 1.079046 |  |  |
|  | 23 | C | 7.723082 | 6.777027 | 3.338962 | 2.294804 | 1.434071 |  |  |
|  | 24 | H | 8.382963 | 7.624626 | 4.347461 | 3.336644 | 2.244316 |  |  |
|  | 25 | C | 7.058861 | 6.160156 | 3.342532 | 2.299905 | 2.308075 |  |  |
|  | 26 | H | 7.138775 | 6.518276 | 4.352166 | 3.343024 | 3.351603 |  |  |
|  | 27 | C | 6.585058 | 5.315074 | 2.238510 | 1.426087 | 2.297436 |  |  |
|  | 28 | C | 6.169580 | 5.602570 | 4.353844 | 3.756332 | 3.141795 |  |  |
|  | 29 | O | 6.777538 | 6.392934 | 5.329224 | 4.783827 | 4.003905 |  |  |
|  | 30 | C | 3.161148 | 3.245478 | 5.648750 | 5.423214 | 5.622572 |  |  |
|  | 31 | O | 3.737197 | 4.135216 | 6.566388 | 6.347202 | 6.385121 |  |  |

|                                                                                                                                                                                                                                          |                                                   |
|------------------------------------------------------------------------------------------------------------------------------------------------------------------------------------------------------------------------------------------|---------------------------------------------------|
|                                                                                                                                                                                                                                          | 32 C 4.715625 3.361676 3.043198 3.032143 3.474290 |
|                                                                                                                                                                                                                                          | 33 O 5.325566 3.707954 3.065958 3.403362 3.865519 |
|                                                                                                                                                                                                                                          | 21 22 23 24 25                                    |
|                                                                                                                                                                                                                                          | 21 H 0.000000                                     |
|                                                                                                                                                                                                                                          | 22 H 4.348327 0.000000                            |
|                                                                                                                                                                                                                                          | 23 C 3.333161 2.245862 0.000000                   |
|                                                                                                                                                                                                                                          | 24 H 4.342711 2.702853 1.079270 0.000000          |
|                                                                                                                                                                                                                                          | 25 C 2.225486 3.350290 1.418951 2.231185 0.000000 |
|                                                                                                                                                                                                                                          | 26 H 2.681910 4.360795 2.230979 2.688150 1.078753 |
|                                                                                                                                                                                                                                          | 27 C 1.078319 3.341848 2.290757 3.333729 1.414321 |
|                                                                                                                                                                                                                                          | 28 C 4.882685 3.324306 3.092865 3.263282 3.732212 |
|                                                                                                                                                                                                                                          | 29 O 6.024602 3.944860 3.954994 3.877476 4.757617 |
|                                                                                                                                                                                                                                          | 30 C 5.597918 6.029280 5.679865 6.155869 5.561618 |
|                                                                                                                                                                                                                                          | 31 O 6.695278 6.659129 6.440571 6.786809 6.480668 |
|                                                                                                                                                                                                                                          | 32 C 3.813176 3.858645 4.056088 4.829899 4.062310 |
|                                                                                                                                                                                                                                          | 33 O 4.508117 3.995223 4.758238 5.536616 4.920988 |
|                                                                                                                                                                                                                                          | 26 27 28 29 30                                    |
|                                                                                                                                                                                                                                          | 26 H 0.000000                                     |
|                                                                                                                                                                                                                                          | 27 C 2.226823 0.000000                            |
|                                                                                                                                                                                                                                          | 28 C 4.309273 4.069966 0.000000                   |
|                                                                                                                                                                                                                                          | 29 O 5.278894 5.187047 1.146276 0.000000          |
|                                                                                                                                                                                                                                          | 30 C 5.895163 5.373242 3.304209 3.709415 0.000000 |
|                                                                                                                                                                                                                                          | 31 O 6.805156 6.396286 3.705760 3.762532 1.146348 |
|                                                                                                                                                                                                                                          | 32 C 4.803464 3.443559 2.685012 3.563569 2.675173 |
|                                                                                                                                                                                                                                          | 33 O 5.769413 4.151450 3.400441 4.088391 3.382749 |
|                                                                                                                                                                                                                                          | 31 32 33                                          |
|                                                                                                                                                                                                                                          | 31 O 0.000000                                     |
|                                                                                                                                                                                                                                          | 32 C 3.551346 0.000000                            |
|                                                                                                                                                                                                                                          | 33 O 4.066727 1.172372 0.000000                   |
|                                                                                                                                                                                                                                          | 1 2 3 4 5                                         |
|                                                                                                                                                                                                                                          | 1 Ru 0.000000                                     |
|                                                                                                                                                                                                                                          | 2 Ru 2.774020 0.000000                            |
|                                                                                                                                                                                                                                          | 3 P 2.365269 2.349653 0.000000                    |
|                                                                                                                                                                                                                                          | 4 C 3.435731 3.488334 1.859090 0.000000           |
|                                                                                                                                                                                                                                          | 5 H 3.443682 3.606393 2.543646 1.090099 0.000000  |
|                                                                                                                                                                                                                                          | 6 H 3.864732 4.439293 2.438161 1.094022 1.782354  |
|                                                                                                                                                                                                                                          | 7 H 4.343948 3.742726 2.414599 1.094563 1.770213  |
|                                                                                                                                                                                                                                          | 8 H 2.966477 5.447715 5.267336 6.099947 5.888750  |
|                                                                                                                                                                                                                                          | 9 C 2.250696 4.856640 4.481903 5.117629 4.856209  |
|                                                                                                                                                                                                                                          | 10 C 2.214014 4.950384 3.881065 4.362882 4.282199 |
|                                                                                                                                                                                                                                          | 11 H 3.004258 4.561100 5.046857 5.400104 4.784808 |
|                                                                                                                                                                                                                                          | 12 H 2.931383 5.624721 4.294115 4.882246 4.987309 |
|                                                                                                                                                                                                                                          | 13 C 2.262694 4.556716 3.334938 3.265015 3.014564 |
|                                                                                                                                                                                                                                          | 14 H 2.987130 4.937881 3.292605 2.808377 2.701398 |
|                                                                                                                                                                                                                                          | 15 C 2.290800 4.146164 3.658946 3.517258 2.901436 |
|                                                                                                                                                                                                                                          | 16 H 3.033232 4.204016 3.899484 3.344604 2.463123 |
| 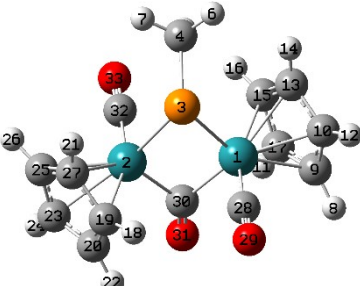 <p>2S -1297.412194 2.11 C1<br/>WBI 0.33</p> <p>Charge densities</p> <p>1<br/>1 Ru 0.330540<br/>2 Ru 0.309839<br/>3 P -0.075682<br/>4 C -0.044751</p> |                                                   |

|      |           |      |          |          |          |          |          |
|------|-----------|------|----------|----------|----------|----------|----------|
| 9 C  | -0.003551 | 17 C | 2.290880 | 4.364679 | 4.356842 | 4.690466 | 4.172107 |
| 10 C | -0.021328 | 18 H | 4.133426 | 3.026903 | 3.537516 | 5.313755 | 5.908594 |
| 13 C | 0.026736  | 19 C | 4.100341 | 2.294850 | 3.410229 | 5.026394 | 5.508671 |
| 15 C | -0.041210 | 20 C | 4.272985 | 2.291217 | 4.178424 | 5.652353 | 5.886678 |
| 17 C | 0.040033  | 21 H | 4.978115 | 2.983406 | 3.172790 | 4.254664 | 4.962918 |
| 19 C | 0.012446  | 22 H | 4.427299 | 3.005959 | 4.836226 | 6.378236 | 6.544550 |
| 20 C | 0.022795  | 23 C | 4.809161 | 2.256363 | 4.445832 | 5.544078 | 5.645564 |
| 23 C | 0.007496  | 24 H | 5.391306 | 2.972930 | 5.281659 | 6.209882 | 6.146869 |
| 25 C | -0.031776 | 25 C | 4.958012 | 2.216808 | 3.896788 | 4.800683 | 5.058650 |
| 27 C | 0.039413  | 26 H | 5.659227 | 2.932771 | 4.405937 | 4.925323 | 5.115010 |
| 28 C | 0.016397  | 27 C | 4.575009 | 2.269863 | 3.221226 | 4.468025 | 4.997277 |
| 29 O | -0.149910 | 28 C | 1.838897 | 3.337510 | 2.937057 | 4.568181 | 4.915471 |
| 30 C | -0.044721 | 29 O | 2.985761 | 4.120431 | 3.754985 | 5.486798 | 5.949452 |
| 31 O | -0.215288 | 30 C | 2.025462 | 2.014665 | 3.374495 | 4.500253 | 4.335735 |
| 32 C | -0.025260 | 31 O | 2.985441 | 2.981337 | 4.547035 | 5.613308 | 5.343085 |
| 33 O | -0.152217 | 32 C | 3.361838 | 1.833709 | 3.039385 | 3.132321 | 2.734636 |
|      |           | 33 O | 4.140160 | 2.982474 | 3.885026 | 3.446708 | 2.749712 |
|      |           |      | 6        | 7        | 8        | 9        | 10       |
|      |           | 6 H  | 0.000000 |          |          |          |          |
|      |           | 7 H  | 1.755469 | 0.000000 |          |          |          |
|      |           | 8 H  | 6.261622 | 7.121739 | 0.000000 |          |          |
|      |           | 9 C  | 5.271408 | 6.158780 | 1.078898 | 0.000000 |          |
|      |           | 10 C | 4.264728 | 5.442851 | 2.244402 | 1.432212 | 0.000000 |
|      |           | 11 H | 5.882254 | 6.291703 | 2.677434 | 2.219494 | 3.336994 |
|      |           | 12 H | 4.603465 | 5.934317 | 2.702225 | 2.243078 | 1.079249 |
|      |           | 13 C | 3.178100 | 4.356955 | 3.348200 | 2.305832 | 1.417973 |
|      |           | 14 H | 2.409553 | 3.865988 | 4.357021 | 3.348027 | 2.227946 |
|      |           | 15 C | 3.801978 | 4.513660 | 3.343208 | 2.299707 | 2.295648 |
|      |           | 16 H | 3.757206 | 4.201311 | 4.349193 | 3.339862 | 3.339750 |
|      |           | 17 C | 5.038469 | 5.668798 | 2.225761 | 1.410192 | 2.293359 |
|      |           | 18 H | 5.909819 | 5.495963 | 6.308749 | 6.073087 | 5.993319 |
|      |           | 19 C | 5.785854 | 5.110645 | 6.475391 | 6.150041 | 6.170484 |
|      |           | 20 C | 6.527054 | 5.800396 | 6.333257 | 6.097835 | 6.432374 |
|      |           | 21 H | 4.965908 | 3.895864 | 7.797679 | 7.222581 | 6.878388 |
|      |           | 22 H | 7.208126 | 6.654518 | 6.002911 | 5.945897 | 6.468322 |
|      |           | 23 C | 6.544074 | 5.514222 | 7.062660 | 6.685134 | 7.020747 |
|      |           | 24 H | 7.251354 | 6.186612 | 7.411182 | 7.067013 | 7.562103 |
|      |           | 25 C | 5.791932 | 4.539050 | 7.595616 | 7.062397 | 7.122843 |
|      |           | 26 H | 5.942824 | 4.466091 | 8.365285 | 7.748583 | 7.760888 |
|      |           | 27 C | 5.302236 | 4.268934 | 7.286919 | 6.780153 | 6.646038 |
|      |           | 28 C | 4.880934 | 5.326799 | 3.392770 | 3.187322 | 3.095722 |
|      |           | 29 O | 5.734366 | 6.163090 | 4.046667 | 4.069258 | 3.965533 |
|      |           | 30 C | 5.273390 | 5.126769 | 3.788379 | 3.405364 | 4.017336 |
|      |           | 31 O | 6.389312 | 6.230710 | 3.873866 | 3.740617 | 4.674981 |
|      |           | 32 C | 4.185786 | 3.332824 | 5.851910 | 5.068902 | 5.189179 |
|      |           | 33 O | 4.444065 | 3.576455 | 6.386965 | 5.539689 | 5.669940 |



|    |   |          |          |          |          |          |
|----|---|----------|----------|----------|----------|----------|
|    |   | 11       | 12       | 13       | 14       | 15       |
| 11 | H | 0.000000 |          |          |          |          |
| 12 | H | 4.346148 | 0.000000 |          |          |          |
| 13 | C | 3.338942 | 2.230165 | 0.000000 |          |          |
| 14 | H | 4.349049 | 2.683486 | 1.078242 | 0.000000 |          |
| 15 | C | 2.232402 | 3.338714 | 1.419457 | 2.232299 | 0.000000 |
| 16 | H | 2.685259 | 4.349987 | 2.234770 | 2.694905 | 1.078972 |
| 17 | C | 1.079507 | 3.335760 | 2.296282 | 3.339445 | 1.422146 |
| 18 | H | 6.601224 | 6.188735 | 6.155214 | 6.463103 | 6.290126 |
| 19 | C | 6.320926 | 6.536533 | 6.143153 | 6.468333 | 6.065216 |
| 20 | C | 5.851285 | 6.952159 | 6.430990 | 6.932432 | 6.058996 |
| 21 | H | 7.421995 | 7.210364 | 6.475103 | 6.444374 | 6.548419 |
| 22 | H | 5.697308 | 6.969442 | 6.664337 | 7.294757 | 6.254044 |
| 23 | C | 6.051111 | 7.673489 | 6.754143 | 7.189564 | 6.188621 |
| 24 | H | 6.110064 | 8.301277 | 7.267918 | 7.772888 | 6.516364 |
| 25 | C | 6.612453 | 7.723065 | 6.665943 | 6.889803 | 6.259529 |
| 26 | H | 7.144064 | 8.407295 | 7.134985 | 7.264962 | 6.665899 |
| 27 | C | 6.789973 | 7.073651 | 6.320582 | 6.464588 | 6.213900 |
| 28 | C | 4.403227 | 3.252705 | 3.700487 | 4.269662 | 4.068473 |
| 29 | O | 5.401376 | 3.871572 | 4.726308 | 5.229510 | 5.191401 |
| 30 | C | 2.926540 | 4.804086 | 4.015167 | 4.788257 | 3.370728 |
| 31 | O | 2.848479 | 5.476682 | 4.822982 | 5.704581 | 4.012429 |
| 32 | C | 4.203586 | 6.061910 | 4.383001 | 4.692042 | 3.598593 |
| 33 | O | 4.393253 | 6.609933 | 4.681001 | 4.921227 | 3.730668 |
|    |   | 16       | 17       | 18       | 19       | 20       |
| 16 | H | 0.000000 |          |          |          |          |
| 17 | C | 2.232133 | 0.000000 |          |          |          |
| 18 | H | 6.712679 | 6.250825 | 0.000000 |          |          |
| 19 | C | 6.335256 | 6.081505 | 1.079035 | 0.000000 |          |
| 20 | C | 6.271805 | 5.856434 | 2.234458 | 1.421047 | 0.000000 |
| 21 | H | 6.592277 | 7.025036 | 2.685262 | 2.229454 | 3.337743 |
| 22 | H | 6.575871 | 5.803434 | 2.688568 | 2.231163 | 1.079706 |
| 23 | C | 6.155988 | 6.157235 | 3.343412 | 2.301771 | 1.412232 |
| 24 | H | 6.391430 | 6.394291 | 4.353259 | 3.345165 | 2.228409 |
| 25 | C | 6.132388 | 6.536233 | 3.337990 | 2.294912 | 2.291216 |
| 26 | H | 6.372135 | 7.089879 | 4.347695 | 3.337974 | 3.334055 |
| 27 | C | 6.273961 | 6.518164 | 2.231183 | 1.419056 | 2.295385 |
| 28 | C | 4.868964 | 3.796292 | 3.084656 | 3.499931 | 3.920134 |
| 29 | O | 6.013531 | 4.840218 | 2.915224 | 3.628569 | 4.163627 |
| 30 | C | 3.733609 | 2.942219 | 3.851925 | 3.445867 | 2.944896 |
| 31 | O | 4.357780 | 3.236666 | 4.563233 | 4.145159 | 3.296211 |
| 32 | C | 3.192095 | 4.130619 | 4.844154 | 4.068344 | 3.866808 |
| 33 | O | 3.015640 | 4.409345 | 5.987682 | 5.196944 | 4.938242 |
|    |   | 21       | 22       | 23       | 24       | 25       |
| 21 | H | 0.000000 |          |          |          |          |
| 22 | H | 4.346677 | 0.000000 |          |          |          |

|                                                                                                                                                                                                                                                                                                                                                                          |                                                                                                                                                                                                                                                                                                                                                                                                                                                                                                                                                                                                                                                                                                                                                                                                                                                                                                                                                                                                                                                                                                                                                              |
|--------------------------------------------------------------------------------------------------------------------------------------------------------------------------------------------------------------------------------------------------------------------------------------------------------------------------------------------------------------------------|--------------------------------------------------------------------------------------------------------------------------------------------------------------------------------------------------------------------------------------------------------------------------------------------------------------------------------------------------------------------------------------------------------------------------------------------------------------------------------------------------------------------------------------------------------------------------------------------------------------------------------------------------------------------------------------------------------------------------------------------------------------------------------------------------------------------------------------------------------------------------------------------------------------------------------------------------------------------------------------------------------------------------------------------------------------------------------------------------------------------------------------------------------------|
|                                                                                                                                                                                                                                                                                                                                                                          | <p>23 C 3.351413 2.221216 0.000000</p> <p>24 H 4.361081 2.680316 1.078816 0.000000</p> <p>25 C 2.232921 3.335104 1.430684 2.243755 0.000000</p> <p>26 H 2.689653 4.344722 2.240994 2.700739 1.079434</p> <p>27 C 1.078573 3.338118 2.307840 3.350289 1.419257</p> <p>28 C 4.776003 3.904145 4.922739 5.676594 5.151227</p> <p>29 O 5.044036 4.030174 5.364754 6.170713 5.626394</p> <p>30 C 4.836108 2.936459 3.335570 3.669612 3.974791</p> <p>31 O 5.769237 2.951822 3.664777 3.713191 4.618963</p> <p>32 C 4.171320 4.505495 3.278121 3.533575 3.098142</p> <p>33 O 5.108337 5.542876 4.194831 4.248202 3.980348</p> <p>26 27 28 29 30</p> <p>26 H 0.000000</p> <p>27 C 2.230779 0.000000</p> <p>28 C 6.061193 4.394680 0.000000</p> <p>29 O 6.606682 4.706464 1.147496 0.000000</p> <p>30 C 4.736759 4.053090 2.766139 3.661306 0.000000</p> <p>31 O 5.371511 4.878566 3.541654 4.281684 1.172767</p> <p>32 C 3.234543 3.658214 4.635427 5.615406 2.742256</p> <p>33 O 3.860961 4.679341 5.616730 6.650566 3.629232</p> <p>31 32 33</p> <p>31 O 0.000000</p> <p>32 C 3.515494 0.000000</p> <p>33 O 4.242714 1.148980 0.000000</p>                        |
| 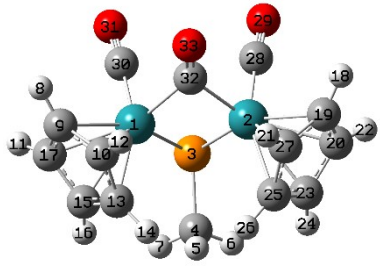 <p>3S -1297.408871 4.20 Cs<br/>WBI 0.33</p> <p>Charges and spin densities</p> <p>1</p> <p>1 Ru 0.317868</p> <p>2 Ru 0.317874</p> <p>3 P -0.069765</p> <p>4 C -0.068050</p> <p>9 C 0.006357</p> <p>10 C 0.028403</p> <p>13 C -0.043810</p> <p>15 C 0.014522</p> <p>17 C -0.013592</p> | <p>1 2 3 4 5</p> <p>1 Ru 0.000000</p> <p>2 Ru 2.766536 0.000000</p> <p>3 P 2.368010 2.368042 0.000000</p> <p>4 C 3.411703 3.411968 1.865030 0.000000</p> <p>5 H 3.440386 3.440463 2.549648 1.091055 0.000000</p> <p>6 H 4.357856 3.761529 2.432894 1.094339 1.778352</p> <p>7 H 3.760713 4.357905 2.432843 1.094339 1.778336</p> <p>8 H 2.961708 5.386996 5.282173 6.104831 5.923705</p> <p>9 C 2.246673 4.776876 4.514319 5.133076 4.897568</p> <p>10 C 2.280604 4.189641 4.374047 4.714062 4.221054</p> <p>11 H 2.931521 5.650673 4.378938 4.898388 5.018688</p> <p>12 H 2.997619 4.342992 5.042502 5.421349 4.832869</p> <p>13 C 2.288086 3.978807 3.716065 3.566714 2.968776</p> <p>14 H 3.034559 3.992258 3.955746 3.410731 2.545592</p> <p>15 C 2.269608 4.491421 3.440918 3.319104 3.074849</p> <p>16 H 2.995934 4.902477 3.434241 2.885525 2.766060</p> <p>17 C 2.211756 4.922298 3.955097 4.384931 4.321155</p> <p>18 H 5.388678 2.961631 5.281435 6.104591 5.923970</p> <p>19 C 4.777847 2.246571 4.513803 5.133016 4.897733</p> <p>20 C 4.921938 2.211782 3.953611 4.383059 4.319062</p> <p>21 H 4.345242 2.997611 5.044195 5.424618 4.836742</p> |

|      |           |          |          |          |          |  |
|------|-----------|----------|----------|----------|----------|--|
| 19 C | 0.006197  |          |          |          |          |  |
| 20 C | -0.013627 |          |          |          |          |  |
| 23 C | 0.014908  |          |          |          |          |  |
| 25 C | -0.043916 |          |          |          |          |  |
| 27 C | 0.028451  |          |          |          |          |  |
| 28 C | 0.008136  |          |          |          |          |  |
| 29 O | -0.123592 |          |          |          |          |  |
| 30 C | 0.008194  |          |          |          |          |  |
| 31 O | -0.123606 |          |          |          |          |  |
| 32 C | -0.038741 |          |          |          |          |  |
| 33 O | -0.212213 |          |          |          |          |  |
| 22 H | 5.650079  | 2.931592 | 4.376478 | 4.895010 | 5.015257 |  |
| 23 C | 4.490178  | 2.269680 | 3.440451 | 3.318208 | 3.072854 |  |
| 24 H | 4.900206  | 2.995985 | 3.433307 | 2.883066 | 2.761697 |  |
| 25 C | 3.978424  | 2.288088 | 3.717257 | 3.568935 | 2.970582 |  |
| 26 H | 3.991616  | 3.034647 | 3.958036 | 3.414915 | 2.549631 |  |
| 27 C | 4.190898  | 2.280603 | 4.375062 | 4.716180 | 4.223419 |  |
| 28 C | 3.533064  | 1.844604 | 2.873674 | 4.473356 | 4.862754 |  |
| 29 O | 4.386804  | 2.987701 | 3.680010 | 5.369508 | 5.879476 |  |
| 30 C | 1.844601  | 3.532991 | 2.873585 | 4.473079 | 4.862659 |  |
| 31 O | 2.987704  | 4.386665 | 3.679861 | 5.369196 | 5.879351 |  |
| 32 C | 2.018920  | 2.018891 | 3.326162 | 4.570836 | 4.474339 |  |
| 33 O | 2.982015  | 2.982095 | 4.488636 | 5.724617 | 5.556578 |  |
|      | 6         | 7        | 8        | 9        | 10       |  |
| 6 H  | 0.000000  |          |          |          |          |  |
| 7 H  | 1.751320  | 0.000000 |          |          |          |  |
| 8 H  | 7.147867  | 6.186171 | 0.000000 |          |          |  |
| 9 C  | 6.194109  | 5.206997 | 1.078832 | 0.000000 |          |  |
| 10 C | 5.723373  | 4.993298 | 2.226190 | 1.410500 | 0.000000 |  |
| 11 H | 5.943732  | 4.533589 | 2.701296 | 2.241902 | 3.334510 |  |
| 12 H | 6.354376  | 5.841252 | 2.677820 | 2.219775 | 1.079627 |  |
| 13 C | 4.585376  | 3.783562 | 3.343413 | 2.299550 | 1.423941 |  |
| 14 H | 4.297200  | 3.768708 | 4.350164 | 3.339960 | 2.234701 |  |
| 15 C | 4.409853  | 3.152132 | 3.350817 | 2.308670 | 2.299020 |  |
| 16 H | 3.921267  | 2.417353 | 4.359417 | 3.350727 | 3.342441 |  |
| 17 C | 5.468227  | 4.202131 | 2.244561 | 1.431839 | 2.292118 |  |
| 18 H | 6.185790  | 7.147584 | 7.322263 | 6.944077 | 6.138075 |  |
| 19 C | 5.207115  | 6.193986 | 6.942861 | 6.425319 | 5.540030 |  |
| 20 C | 4.200593  | 5.466383 | 7.496605 | 6.851850 | 6.038249 |  |
| 21 H | 5.844718  | 6.357581 | 5.772714 | 5.281074 | 4.139429 |  |
| 22 H | 4.530110  | 5.940399 | 8.309072 | 7.694663 | 6.984138 |  |
| 23 C | 3.152504  | 4.408944 | 7.137689 | 6.339307 | 5.431995 |  |
| 24 H | 2.416638  | 3.918992 | 7.668057 | 6.793263 | 5.952423 |  |
| 25 C | 3.786903  | 4.587280 | 6.260466 | 5.466112 | 4.372184 |  |
| 26 H | 3.774183  | 4.300958 | 6.057821 | 5.172954 | 3.979038 |  |
| 27 C | 4.995835  | 5.725342 | 6.135800 | 5.539547 | 4.466673 |  |
| 28 C | 4.686808  | 5.264166 | 5.966204 | 5.588594 | 5.397938 |  |
| 29 O | 5.508888  | 6.072621 | 6.609507 | 6.356963 | 6.335091 |  |
| 30 C | 5.264003  | 4.686086 | 3.402186 | 3.185931 | 3.805818 |  |
| 31 O | 6.072357  | 5.508195 | 4.048617 | 4.056549 | 4.845915 |  |
| 32 C | 5.263236  | 5.262780 | 3.711837 | 3.383016 | 3.010214 |  |
| 33 O | 6.411033  | 6.410501 | 3.773327 | 3.732206 | 3.393145 |  |
|      | 11        | 12       | 13       | 14       | 15       |  |
| 11 H | 0.000000  |          |          |          |          |  |
| 12 H | 4.345062  | 0.000000 |          |          |          |  |
| 13 C | 3.334516  | 2.235753 | 0.000000 |          |          |  |
| 14 H | 4.344106  | 2.691294 | 1.078592 | 0.000000 |          |  |

|  |    |   |          |          |          |          |          |
|--|----|---|----------|----------|----------|----------|----------|
|  | 15 | C | 2.229490 | 3.341892 | 1.417500 | 2.229387 | 0.000000 |
|  | 16 | H | 2.683467 | 4.352365 | 2.231528 | 2.689296 | 1.078219 |
|  | 17 | C | 1.079420 | 3.336039 | 2.291473 | 3.334407 | 1.418317 |
|  | 18 | H | 8.310488 | 5.774628 | 6.264363 | 6.062842 | 7.141111 |
|  | 19 | C | 7.695834 | 5.280541 | 5.468724 | 5.176570 | 6.342132 |
|  | 20 | C | 7.753246 | 6.007120 | 5.657902 | 5.301885 | 6.320600 |
|  | 21 | H | 7.002433 | 3.573301 | 4.325459 | 3.995919 | 5.531393 |
|  | 22 | H | 8.433915 | 6.999943 | 6.588479 | 6.274503 | 7.123582 |
|  | 23 | C | 7.123879 | 5.525397 | 4.773133 | 4.260963 | 5.427725 |
|  | 24 | H | 7.284974 | 6.191240 | 5.077721 | 4.519895 | 5.538400 |
|  | 25 | C | 6.589599 | 4.319095 | 3.829353 | 3.236811 | 4.775473 |
|  | 26 | H | 6.275892 | 3.986926 | 3.236003 | 2.431474 | 4.263722 |
|  | 27 | C | 6.985919 | 4.137370 | 4.375869 | 3.984497 | 5.436193 |
|  | 28 | C | 6.154423 | 5.602820 | 5.390602 | 5.629848 | 5.592518 |
|  | 29 | O | 6.761082 | 6.548955 | 6.407120 | 6.719778 | 6.487633 |
|  | 30 | C | 3.192562 | 4.435714 | 4.060627 | 4.869455 | 3.668171 |
|  | 31 | O | 3.775532 | 5.438399 | 5.173792 | 6.006969 | 4.673299 |
|  | 32 | C | 4.754389 | 3.017501 | 3.498274 | 3.919082 | 4.086833 |
|  | 33 | O | 5.396670 | 3.079620 | 4.224712 | 4.659015 | 4.930969 |
|  |    |   | 16       | 17       | 18       | 19       | 20       |
|  | 16 | H | 0.000000 |          |          |          |          |
|  | 17 | C | 2.229056 | 0.000000 |          |          |          |
|  | 18 | H | 7.672165 | 7.498514 | 0.000000 |          |          |
|  | 19 | C | 6.797174 | 6.853155 | 1.078835 | 0.000000 |          |
|  | 20 | C | 6.556959 | 6.989002 | 2.244580 | 1.431884 | 0.000000 |
|  | 21 | H | 6.198833 | 6.010052 | 2.677796 | 2.219751 | 3.336093 |
|  | 22 | H | 7.285346 | 7.752854 | 2.701334 | 2.241962 | 1.079416 |
|  | 23 | C | 5.540286 | 6.319962 | 3.350770 | 2.308630 | 1.418284 |
|  | 24 | H | 5.439068 | 6.555213 | 4.359379 | 3.350694 | 2.229020 |
|  | 25 | C | 5.082544 | 5.658320 | 3.343390 | 2.299519 | 2.291487 |
|  | 26 | H | 4.526038 | 5.302239 | 4.350136 | 3.339925 | 3.334429 |
|  | 27 | C | 5.958317 | 6.040078 | 2.226161 | 1.410468 | 2.292172 |
|  | 28 | C | 5.975114 | 5.680490 | 3.400340 | 3.184809 | 3.054692 |
|  | 29 | O | 6.847375 | 6.425299 | 4.046039 | 4.055088 | 3.901662 |
|  | 30 | C | 4.223433 | 3.054139 | 5.966965 | 5.588949 | 5.680361 |
|  | 31 | O | 5.156257 | 3.900995 | 6.609772 | 6.357000 | 6.425229 |
|  | 32 | C | 4.869578 | 4.003273 | 3.714320 | 3.384442 | 4.004155 |
|  | 33 | O | 5.818383 | 4.660904 | 3.777098 | 3.734311 | 4.662591 |
|  |    |   | 21       | 22       | 23       | 24       | 25       |
|  | 21 | H | 0.000000 |          |          |          |          |
|  | 22 | H | 4.345110 | 0.000000 |          |          |          |
|  | 23 | C | 3.341906 | 2.229468 | 0.000000 |          |          |
|  | 24 | H | 4.352368 | 2.683442 | 1.078217 | 0.000000 |          |
|  | 25 | C | 2.235787 | 3.334527 | 1.417496 | 2.231498 | 0.000000 |
|  | 26 | H | 2.691308 | 4.344126 | 2.229413 | 2.689296 | 1.078599 |
|  | 27 | C | 1.079625 | 3.334558 | 2.299031 | 3.342442 | 1.423968 |

|                                                                                                                                                                                                                                                                                                                                                                                                                                                                                                                                   |                                                                                                                                                                                                                                                                                                                                                                                                                                                                                                                                                                                                                                                                                                                                                                                                                                                                                                                                                                                                                                                                                                                                                                                                                                                                                                                                                                                                                                                           |
|-----------------------------------------------------------------------------------------------------------------------------------------------------------------------------------------------------------------------------------------------------------------------------------------------------------------------------------------------------------------------------------------------------------------------------------------------------------------------------------------------------------------------------------|-----------------------------------------------------------------------------------------------------------------------------------------------------------------------------------------------------------------------------------------------------------------------------------------------------------------------------------------------------------------------------------------------------------------------------------------------------------------------------------------------------------------------------------------------------------------------------------------------------------------------------------------------------------------------------------------------------------------------------------------------------------------------------------------------------------------------------------------------------------------------------------------------------------------------------------------------------------------------------------------------------------------------------------------------------------------------------------------------------------------------------------------------------------------------------------------------------------------------------------------------------------------------------------------------------------------------------------------------------------------------------------------------------------------------------------------------------------|
|                                                                                                                                                                                                                                                                                                                                                                                                                                                                                                                                   | <p>28 C 4.434052 3.193687 3.669310 4.225311 4.060747</p> <p>29 O 5.436132 3.777023 4.674728 5.158763 5.173926</p> <p>30 C 5.603552 6.154274 5.591999 5.974153 5.390315</p> <p>31 O 6.549067 6.761100 6.487372 6.846930 6.406838</p> <p>32 C 3.017510 4.755765 4.086244 4.868541 3.496953</p> <p>33 O 3.078600 5.399261 4.930634 5.817637 4.222990</p> <p>26 27 28 29 30</p> <p>26 H 0.000000</p> <p>27 C 2.234708 0.000000</p> <p>28 C 4.869768 3.804772 0.000000</p> <p>29 O 6.007344 4.844526 1.144261 0.000000</p> <p>30 C 5.629486 5.398323 3.281983 3.680901 0.000000</p> <p>31 O 6.719486 6.335102 3.680792 3.729239 1.144263</p> <p>32 C 3.916869 3.010268 2.679273 3.558994 2.679257</p> <p>33 O 4.655906 3.392815 3.389761 4.079477 3.389649</p> <p>31 32 33</p> <p>31 O 0.000000</p> <p>32 C 3.558957 0.000000</p> <p>33 O 4.079364 1.172932 0.000000</p>                                                                                                                                                                                                                                                                                                                                                                                                                                                                                                                                                                                       |
| 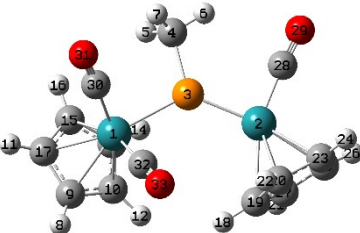 <p>4S -1297.391410 15.16 C1<br/>WBI 0.06</p> <p>Charges and spin densities</p> <p>1</p> <p>1 Ru 0.373288</p> <p>2 Ru 0.471448</p> <p>3 P -0.154001</p> <p>4 C 0.029371</p> <p>9 C 0.005076</p> <p>10 C -0.018000</p> <p>13 C 0.077322</p> <p>15 C -0.026616</p> <p>17 C 0.000176</p> <p>19 C -0.075912</p> <p>20 C -0.021106</p> <p>23 C -0.025801</p> <p>25 C -0.033513</p> <p>27 C -0.040688</p> <p>28 C -0.115291</p> <p>29 O -0.168046</p> | <p>1 2 3 4 5</p> <p>1 Ru 0.000000</p> <p>2 Ru 4.098189 0.000000</p> <p>3 P 2.378045 2.154779 0.000000</p> <p>4 C 3.364257 3.548585 1.838112 0.000000</p> <p>5 H 3.385464 4.258319 2.446777 1.093091 0.000000</p> <p>6 H 4.357233 3.529166 2.434529 1.090194 1.779116</p> <p>7 H 3.556644 4.219052 2.445575 1.092789 1.767056</p> <p>8 H 2.988178 6.269641 5.131155 6.266499 6.067177</p> <p>9 C 2.266938 5.681266 4.364153 5.361206 5.073032</p> <p>10 C 2.261911 4.675782 3.635522 4.778506 4.510403</p> <p>11 H 2.991255 7.025165 5.201053 5.539898 5.065487</p> <p>12 H 2.989773 4.442310 3.922852 5.306563 5.161737</p> <p>13 C 2.276453 4.578746 3.186943 3.847582 3.350527</p> <p>14 H 2.984799 4.207924 3.057215 3.567855 3.040371</p> <p>15 C 2.264761 5.519604 3.719125 3.934210 3.283473</p> <p>16 H 2.998673 6.008920 4.076909 3.783355 2.933816</p> <p>17 C 2.269682 6.129623 4.408203 4.922791 4.457725</p> <p>18 H 3.947832 2.973344 3.740518 5.565974 5.979444</p> <p>19 C 4.418536 2.231309 3.584233 5.351904 5.890579</p> <p>20 C 4.927715 2.238145 3.793675 5.443743 6.197486</p> <p>21 H 5.439831 2.948734 4.372796 5.813821 6.101854</p> <p>22 H 4.936761 2.964203 4.086591 5.703837 6.513006</p> <p>23 C 5.884950 2.232952 4.254446 5.641074 6.449232</p> <p>24 H 6.639583 2.968749 4.883755 6.072711 6.975861</p> <p>25 C 6.024192 2.223104 4.343784 5.676494 6.314968</p> <p>26 H 6.864717 2.943407 5.018638 6.119467 6.724447</p> |

|      |           |      |          |          |          |          |          |
|------|-----------|------|----------|----------|----------|----------|----------|
| 30 C | -0.037541 | 27 C | 5.184294 | 2.210453 | 3.939703 | 5.484919 | 5.951762 |
| 31 O | -0.110245 | 28 C | 5.187950 | 1.842960 | 2.834522 | 3.232321 | 4.003823 |
| 32 C | -0.016553 | 29 O | 6.105824 | 2.993355 | 3.735567 | 3.618350 | 4.337173 |
| 33 O | -0.113370 | 30 C | 1.855404 | 4.947758 | 2.998133 | 3.228147 | 3.403803 |
|      |           | 31 O | 2.998034 | 5.736576 | 3.823030 | 3.664637 | 3.893986 |
|      |           | 32 C | 1.857294 | 3.903886 | 2.942163 | 4.388688 | 4.789195 |
|      |           | 33 O | 2.998783 | 4.225325 | 3.747876 | 5.268619 | 5.794039 |
|      |           |      | 6        | 7        | 8        | 9        | 10       |
|      |           | 6 H  | 0.000000 |          |          |          |          |
|      |           | 7 H  | 1.775223 | 0.000000 |          |          |          |
|      |           | 8 H  | 7.226553 | 6.511638 | 0.000000 |          |          |
|      |           | 9 C  | 6.315451 | 5.677910 | 1.079431 | 0.000000 |          |
|      |           | 10 C | 5.586216 | 5.344052 | 2.240440 | 1.429713 | 0.000000 |
|      |           | 11 H | 6.599763 | 5.542102 | 2.679887 | 2.224166 | 3.343888 |
|      |           | 12 H | 5.990217 | 5.959926 | 2.702833 | 2.244476 | 1.078730 |
|      |           | 13 C | 4.631701 | 4.502354 | 3.341879 | 2.299285 | 1.416719 |
|      |           | 14 H | 4.142583 | 4.422319 | 4.350321 | 3.341754 | 2.224251 |
|      |           | 15 C | 4.875831 | 4.305966 | 3.342265 | 2.297895 | 2.296542 |
|      |           | 16 H | 4.680815 | 4.079224 | 4.350627 | 3.339647 | 3.339424 |
|      |           | 17 C | 5.944038 | 5.108253 | 2.223520 | 1.410664 | 2.299637 |
|      |           | 18 H | 5.989559 | 6.123570 | 4.591017 | 4.455578 | 3.630611 |
|      |           | 19 C | 5.591965 | 5.951485 | 5.540155 | 5.284593 | 4.343578 |
|      |           | 20 C | 5.583824 | 5.867574 | 6.411565 | 6.183108 | 5.403122 |
|      |           | 21 H | 5.837407 | 6.700372 | 6.399273 | 5.954326 | 4.654759 |
|      |           | 22 H | 5.947818 | 5.938732 | 6.375584 | 6.258679 | 5.706642 |
|      |           | 23 C | 5.502531 | 6.147123 | 7.616947 | 7.269730 | 6.332181 |
|      |           | 24 H | 5.820796 | 6.469449 | 8.526680 | 8.180391 | 7.298583 |
|      |           | 25 C | 5.463568 | 6.396926 | 7.618230 | 7.180789 | 6.039408 |
|      |           | 26 H | 5.733455 | 6.897551 | 8.527595 | 8.027045 | 6.809224 |
|      |           | 27 C | 5.502234 | 6.267031 | 6.414479 | 6.009922 | 4.827661 |
|      |           | 28 C | 2.649570 | 3.936220 | 7.712358 | 6.972866 | 5.945197 |
|      |           | 29 O | 2.740215 | 4.259360 | 8.728215 | 7.933689 | 6.906772 |
|      |           | 30 C | 4.270965 | 2.817971 | 4.301368 | 3.734390 | 4.065790 |
|      |           | 31 O | 4.626654 | 2.931369 | 5.261485 | 4.762092 | 5.190249 |
|      |           | 32 C | 5.228517 | 4.438521 | 3.349523 | 3.182389 | 3.259029 |
|      |           | 33 O | 6.011718 | 5.260651 | 3.982547 | 4.058900 | 4.162009 |
|      |           |      | 11       | 12       | 13       | 14       | 15       |
|      |           | 11 H | 0.000000 |          |          |          |          |
|      |           | 12 H | 4.353868 | 0.000000 |          |          |          |
|      |           | 13 C | 3.343135 | 2.227032 | 0.000000 |          |          |
|      |           | 14 H | 4.355685 | 2.674768 | 1.079548 | 0.000000 |          |
|      |           | 15 C | 2.241384 | 3.337807 | 1.416553 | 2.231172 | 0.000000 |
|      |           | 16 H | 2.698478 | 4.346654 | 2.230198 | 2.690752 | 1.079139 |
|      |           | 17 C | 1.079325 | 3.342380 | 2.300553 | 3.345800 | 1.430130 |
|      |           | 18 H | 6.404799 | 2.927755 | 4.445358 | 4.557408 | 5.501695 |
|      |           | 19 C | 7.115192 | 3.699399 | 4.899712 | 4.807052 | 5.995331 |

|  |    |   |          |          |          |          |          |  |  |
|--|----|---|----------|----------|----------|----------|----------|--|--|
|  | 20 | C | 7.790076 | 4.917808 | 5.849625 | 5.768145 | 6.780019 |  |  |
|  | 21 | H | 7.859240 | 3.867731 | 4.932453 | 4.450781 | 6.284678 |  |  |
|  | 22 | H | 7.730256 | 5.323796 | 6.233220 | 6.306250 | 6.995827 |  |  |
|  | 23 | C | 8.824881 | 5.837736 | 6.558993 | 6.257234 | 7.557327 |  |  |
|  | 24 | H | 9.615409 | 6.862819 | 7.458540 | 7.142937 | 8.378181 |  |  |
|  | 25 | C | 8.857929 | 5.444755 | 6.182498 | 5.708642 | 7.346573 |  |  |
|  | 26 | H | 9.666490 | 6.220395 | 6.815575 | 6.203993 | 8.007189 |  |  |
|  | 27 | C | 7.843242 | 4.126303 | 5.135096 | 4.748868 | 6.384087 |  |  |
|  | 28 | C | 7.983344 | 5.873115 | 5.445514 | 4.834079 | 6.243753 |  |  |
|  | 29 | O | 8.785514 | 6.890611 | 6.253394 | 5.552966 | 6.968278 |  |  |
|  | 30 | C | 3.378607 | 4.843820 | 3.804544 | 4.397715 | 3.233787 |  |  |
|  | 31 | O | 4.019125 | 5.985421 | 4.856123 | 5.403320 | 4.130318 |  |  |
|  | 32 | C | 4.259406 | 3.501000 | 3.835118 | 4.440614 | 4.068671 |  |  |
|  | 33 | O | 5.205430 | 4.195110 | 4.892672 | 5.456799 | 5.191580 |  |  |
|  |    |   | 16       | 17       | 18       | 19       | 20       |  |  |
|  | 16 | H | 0.000000 |          |          |          |          |  |  |
|  | 17 | C | 2.241372 | 0.000000 |          |          |          |  |  |
|  | 18 | H | 6.400215 | 5.509547 | 0.000000 |          |          |  |  |
|  | 19 | C | 6.787971 | 6.198833 | 1.078975 | 0.000000 |          |  |  |
|  | 20 | C | 7.484904 | 6.967363 | 2.229275 | 1.418484 | 0.000000 |  |  |
|  | 21 | H | 6.983831 | 6.813063 | 2.707024 | 2.245195 | 3.347905 |  |  |
|  | 22 | H | 7.708800 | 7.016969 | 2.684108 | 2.230162 | 1.079288 |  |  |
|  | 23 | C | 8.148452 | 7.956974 | 3.341879 | 2.300238 | 1.419377 |  |  |
|  | 24 | H | 8.902837 | 8.793613 | 4.349597 | 3.342095 | 2.231218 |  |  |
|  | 25 | C | 7.928859 | 7.894607 | 3.341447 | 2.298115 | 2.296717 |  |  |
|  | 26 | H | 8.509034 | 8.680509 | 4.351996 | 3.341575 | 3.339702 |  |  |
|  | 27 | C | 7.080412 | 6.844648 | 2.241898 | 1.429399 | 2.303990 |  |  |
|  | 28 | C | 6.441608 | 7.132316 | 4.799077 | 4.007879 | 3.806557 |  |  |
|  | 29 | O | 7.015993 | 7.967632 | 5.941727 | 5.127865 | 4.865047 |  |  |
|  | 30 | C | 3.465190 | 3.196725 | 5.384761 | 5.689610 | 5.797048 |  |  |
|  | 31 | O | 4.144027 | 4.075868 | 6.391468 | 6.629396 | 6.563475 |  |  |
|  | 32 | C | 4.850239 | 3.711554 | 3.126136 | 3.647547 | 3.857169 |  |  |
|  | 33 | O | 5.989187 | 4.732160 | 3.097494 | 3.596781 | 3.552471 |  |  |
|  |    |   | 21       | 22       | 23       | 24       | 25       |  |  |
|  | 21 | H | 0.000000 |          |          |          |          |  |  |
|  | 22 | H | 4.358823 | 0.000000 |          |          |          |  |  |
|  | 23 | C | 3.347687 | 2.229417 | 0.000000 |          |          |  |  |
|  | 24 | H | 4.356434 | 2.684476 | 1.078618 | 0.000000 |          |  |  |
|  | 25 | C | 2.229352 | 3.339849 | 1.424855 | 2.238821 | 0.000000 |  |  |
|  | 26 | H | 2.681068 | 4.349352 | 2.235648 | 2.695833 | 1.079296 |  |  |
|  | 27 | C | 1.078901 | 3.347386 | 2.305929 | 3.348358 | 1.418526 |  |  |
|  | 28 | C | 4.108336 | 4.457896 | 3.216778 | 3.486435 | 3.061508 |  |  |
|  | 29 | O | 5.019312 | 5.487613 | 4.100350 | 4.158119 | 3.901286 |  |  |
|  | 30 | C | 6.939040 | 5.571137 | 6.669458 | 7.197360 | 7.073419 |  |  |
|  | 31 | O | 7.953034 | 6.234199 | 7.372907 | 7.773735 | 7.892528 |  |  |
|  | 32 | C | 5.340100 | 3.551768 | 5.069798 | 5.760139 | 5.554415 |  |  |

|                                                                                                                                                                       |                                                                                                                                                                                                                                                                                                                                                                                                                                                                                                                                                                                                                                                                                                                                                                                                                                                                                                                                                                                                                                                                                                                                                                                                                                                                                                                                                                                                                                                                                                                                                                                                                                                                                                                       |
|-----------------------------------------------------------------------------------------------------------------------------------------------------------------------|-----------------------------------------------------------------------------------------------------------------------------------------------------------------------------------------------------------------------------------------------------------------------------------------------------------------------------------------------------------------------------------------------------------------------------------------------------------------------------------------------------------------------------------------------------------------------------------------------------------------------------------------------------------------------------------------------------------------------------------------------------------------------------------------------------------------------------------------------------------------------------------------------------------------------------------------------------------------------------------------------------------------------------------------------------------------------------------------------------------------------------------------------------------------------------------------------------------------------------------------------------------------------------------------------------------------------------------------------------------------------------------------------------------------------------------------------------------------------------------------------------------------------------------------------------------------------------------------------------------------------------------------------------------------------------------------------------------------------|
|                                                                                                                                                                       | <pre> 33 O  5.594372  2.985494  4.878889  5.488719  5.574056       26      27      28      29      30 26 H  0.000000 27 C  2.228113  0.000000 28 C  3.191854  3.576739  0.000000 29 O  3.757706  4.575185  1.152257  0.000000 30 C  7.884157  6.514381  5.658868  6.399714  0.000000 31 O  8.675429  7.464840  6.238724  6.856658  1.142957 32 C  6.547713  4.814072  5.354091  6.397140  2.615296 33 O  6.622492  4.937547  5.780323  6.847994  3.524407       31      32      33 31 O  0.000000 32 C  3.523670  0.000000 33 O  4.249563  1.141765  0.000000 </pre>                                                                                                                                                                                                                                                                                                                                                                                                                                                                                                                                                                                                                                                                                                                                                                                                                                                                                                                                                                                                                                                                                                                                                  |
| 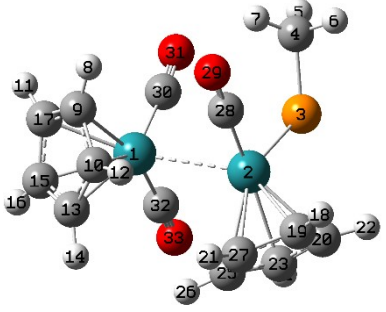 <p>5S. -1297.366150 31.01 C1<br/>WBI 0.45</p> <p>Charge and spin density<br/>1</p> | <pre>       1      2      3      4      5 1 Ru  0.000000 2 Ru  2.813798  0.000000 3 P   3.895212  2.162955  0.000000 4 C   4.551952  3.437215  1.841426  0.000000 5 H   5.008542  4.261527  2.415602  1.093476  0.000000 6 H   5.482792  3.953656  2.398577  1.096745  1.755686 7 H   4.167129  3.506204  2.524142  1.089043  1.783847 8 H   2.996067  4.447293  5.415833  5.131658  5.725872 9 C   2.264216  4.159195  5.371208  5.431766  6.008415 10 C  2.287474  3.659976  5.352933  5.806261  6.520307 11 H  2.948408  5.592610  6.311565  6.262347  6.478412 12 H  3.016954  3.501142  5.361287  5.836391  6.682679 13 C  2.264480  4.111126  5.822801  6.553526  7.153876 14 H  3.007168  4.378781  6.252138  7.207590  7.842074 15 C  2.230596  4.808538  6.124197  6.677934  7.088158 16 H  2.952684  5.554769  6.766571  7.413257  7.721087 17 C  2.230189  4.833372  5.864622  6.026215  6.400157 18 H  5.497448  2.921793  4.170196  5.218328  6.213081 19 C  4.733980  2.209228  3.715315  5.035853  5.958610 20 C  4.799268  2.260399  3.149463  4.794500  5.540267 21 H  4.300610  3.032887  5.140489  6.251467  7.189971 22 H  5.571130  2.959310  3.119130  4.715650  5.379583 23 C  4.115131  2.321357  3.456723  5.219595  5.834891 24 H  4.409690  3.051618  3.694387  5.515357  5.950664 25 C  3.572790  2.338169  4.163280  5.712783  6.432122 26 H  3.404378  3.076172  4.875873  6.369866  7.014003 27 C  4.049838  2.311740  4.331074  5.648383  6.537785 28 C  3.085005  1.816471  2.859525  3.088939  4.075472 29 O  3.770007  2.968672  3.727886  3.414469  4.390805 30 C  1.846799  3.350728  3.280840  3.454216  3.582302 31 O  2.990682  4.157855  3.485618  3.243525  3.035202 </pre> |



|                |               |          |          |          |          |
|----------------|---------------|----------|----------|----------|----------|
| 33 O -0.142437 | 32 C 1.845055 | 3.159106 | 3.951098 | 5.123938 | 5.398886 |
|                | 33 O 2.991303 | 3.878767 | 4.450962 | 5.801621 | 5.968899 |
|                | 6             | 7        | 8        | 9        | 10       |
|                | 6 H 0.000000  |          |          |          |          |
|                | 7 H 1.777764  | 0.000000 |          |          |          |
|                | 8 H 5.834563  | 4.203117 | 0.000000 |          |          |
|                | 9 C 6.221633  | 4.639736 | 1.078716 | 0.000000 |          |
|                | 10 C 6.512400 | 5.171643 | 2.226884 | 1.416283 | 0.000000 |
|                | 11 H 7.233930 | 5.529513 | 2.703346 | 2.239286 | 3.338995 |
|                | 12 H 6.386862 | 5.228911 | 2.674173 | 2.223118 | 1.078456 |
|                | 13 C 7.357997 | 6.053846 | 3.339853 | 2.299014 | 1.415746 |
|                | 14 H 7.964986 | 6.813071 | 4.347950 | 3.341444 | 2.229793 |
|                | 15 C 7.607884 | 6.137645 | 3.346070 | 2.302551 | 2.298089 |
|                | 16 H 8.390093 | 6.947323 | 4.356803 | 3.345977 | 3.341092 |
|                | 17 C 6.955168 | 5.324995 | 2.243400 | 1.427606 | 2.295825 |
|                | 18 H 5.116034 | 5.382666 | 6.353272 | 6.226002 | 5.376064 |
|                | 19 C 5.142348 | 5.229163 | 6.036450 | 5.753953 | 4.855374 |
|                | 20 C 4.967779 | 5.239208 | 6.643558 | 6.293406 | 5.527624 |
|                | 21 H 6.565646 | 6.087068 | 5.230304 | 4.761284 | 3.511494 |
|                | 22 H 4.726263 | 5.347943 | 7.371321 | 7.110122 | 6.461667 |
|                | 23 C 5.654882 | 5.585670 | 6.443474 | 5.891984 | 5.084211 |
|                | 24 H 6.026342 | 5.984510 | 7.027018 | 6.423170 | 5.726504 |
|                | 25 C 6.216329 | 5.816547 | 5.706304 | 5.048518 | 4.017321 |
|                | 26 H 6.991375 | 6.386520 | 5.705836 | 4.889915 | 3.812928 |
|                | 27 C 5.972596 | 5.650209 | 5.464492 | 4.985338 | 3.871102 |
|                | 28 C 3.501189 | 2.651560 | 3.259497 | 3.385863 | 3.223503 |
|                | 29 O 3.686081 | 2.697706 | 2.911483 | 3.381512 | 3.470004 |
|                | 30 C 4.524742 | 3.127417 | 3.495038 | 3.238304 | 3.837073 |
|                | 31 O 4.331800 | 2.992835 | 4.180638 | 4.126502 | 4.896906 |
|                | 32 C 6.061013 | 5.111337 | 4.839386 | 4.061874 | 3.818110 |
|                | 33 O 6.707327 | 5.953708 | 5.983759 | 5.187188 | 4.874399 |
|                | 11            | 12       | 13       | 14       | 15       |
|                | 11 H 0.000000 |          |          |          |          |
|                | 12 H 4.346941 | 0.000000 |          |          |          |
|                | 13 C 3.343364 | 2.227293 | 0.000000 |          |          |
|                | 14 H 4.352263 | 2.686227 | 1.079077 | 0.000000 |          |
|                | 15 C 2.227355 | 3.341483 | 1.428785 | 2.240298 | 0.000000 |
|                | 16 H 2.682969 | 4.351676 | 2.241182 | 2.699093 | 1.079180 |
|                | 17 C 1.079356 | 3.337454 | 2.299741 | 3.342058 | 1.416059 |
|                | 18 H 8.109214 | 4.644849 | 5.995481 | 5.934897 | 7.101852 |
|                | 19 C 7.491469 | 4.274948 | 5.276656 | 5.163150 | 6.344460 |
|                | 20 C 7.712545 | 5.180938 | 5.729901 | 5.615192 | 6.597178 |
|                | 21 H 6.662181 | 2.785296 | 3.842679 | 3.536790 | 5.175992 |
|                | 22 H 8.455573 | 6.121683 | 6.716230 | 6.654374 | 7.499633 |
|                | 23 C 7.055831 | 4.959867 | 4.955787 | 4.742513 | 5.727578 |
|                | 24 H 7.284104 | 5.762056 | 5.417146 | 5.200337 | 5.986362 |

|  |    |   |          |          |          |          |          |
|--|----|---|----------|----------|----------|----------|----------|
|  | 25 | C | 6.388764 | 3.845527 | 3.818136 | 3.473101 | 4.807411 |
|  | 26 | H | 6.014828 | 3.842771 | 3.249864 | 2.722668 | 4.193218 |
|  | 27 | C | 6.718899 | 3.333848 | 4.096150 | 3.836619 | 5.286055 |
|  | 28 | C | 5.142051 | 2.911472 | 4.234678 | 4.793369 | 4.879495 |
|  | 29 | O | 5.223916 | 3.085089 | 4.712154 | 5.380185 | 5.293398 |
|  | 30 | C | 3.231760 | 4.482795 | 4.047718 | 4.843760 | 3.630904 |
|  | 31 | O | 3.792061 | 5.519042 | 5.159629 | 5.977442 | 4.615426 |
|  | 32 | C | 4.247831 | 4.436480 | 3.244749 | 3.496474 | 3.157070 |
|  | 33 | O | 5.195648 | 5.452732 | 4.139976 | 4.177095 | 4.026677 |
|  |    |   | 16       | 17       | 18       | 19       | 20       |
|  | 16 | H | 0.000000 |          |          |          |          |
|  | 17 | C | 2.228675 | 0.000000 |          |          |          |
|  | 18 | H | 7.907228 | 7.221877 | 0.000000 |          |          |
|  | 19 | C | 7.073024 | 6.594134 | 1.079109 | 0.000000 |          |
|  | 20 | C | 7.185504 | 6.905769 | 2.238962 | 1.428410 | 0.000000 |
|  | 21 | H | 5.932602 | 5.625108 | 2.694110 | 2.236214 | 3.348563 |
|  | 22 | H | 8.074858 | 7.719754 | 2.692564 | 2.237454 | 1.078933 |
|  | 23 | C | 6.162907 | 6.249597 | 3.338293 | 2.297329 | 1.408882 |
|  | 24 | H | 6.261566 | 6.570786 | 4.350872 | 3.342690 | 2.226083 |
|  | 25 | C | 5.303242 | 5.461092 | 3.328487 | 2.285687 | 2.288942 |
|  | 26 | H | 4.542254 | 5.079329 | 4.340037 | 3.329723 | 3.327710 |
|  | 27 | C | 5.979975 | 5.736126 | 2.238828 | 1.426444 | 2.306039 |
|  | 28 | C | 5.833219 | 4.451488 | 3.403297 | 3.201041 | 3.777630 |
|  | 29 | O | 6.315990 | 4.623218 | 4.075841 | 4.103291 | 4.830464 |
|  | 30 | C | 4.165970 | 3.091253 | 6.218649 | 5.552608 | 5.348015 |
|  | 31 | O | 5.060311 | 3.924487 | 6.957803 | 6.357182 | 6.037879 |
|  | 32 | C | 3.332577 | 3.694453 | 5.824307 | 4.856299 | 4.441939 |
|  | 33 | O | 3.953304 | 4.715751 | 6.345315 | 5.314986 | 4.651868 |
|  |    |   | 21       | 22       | 23       | 24       | 25       |
|  | 21 | H | 0.000000 |          |          |          |          |
|  | 22 | H | 4.356845 | 0.000000 |          |          |          |
|  | 23 | C | 3.347936 | 2.222497 | 0.000000 |          |          |
|  | 24 | H | 4.353570 | 2.685422 | 1.078882 | 0.000000 |          |
|  | 25 | C | 2.224356 | 3.333934 | 1.427288 | 2.237849 | 0.000000 |
|  | 26 | H | 2.682005 | 4.338754 | 2.230695 | 2.682464 | 1.078291 |
|  | 27 | C | 1.078972 | 3.348060 | 2.303289 | 3.342793 | 1.406017 |
|  | 28 | C | 3.516425 | 4.338894 | 4.099762 | 4.867237 | 3.819410 |
|  | 29 | O | 4.194569 | 5.332715 | 5.235541 | 6.019929 | 4.871465 |
|  | 30 | C | 5.721669 | 5.827522 | 4.863439 | 4.958506 | 4.813469 |
|  | 31 | O | 6.753065 | 6.351704 | 5.656650 | 5.649888 | 5.798608 |
|  | 32 | C | 4.779456 | 5.138578 | 3.366717 | 3.230218 | 3.184656 |
|  | 33 | O | 5.407231 | 5.254747 | 3.412948 | 2.932658 | 3.489560 |
|  |    |   | 26       | 27       | 28       | 29       | 30       |
|  | 26 | H | 0.000000 |          |          |          |          |
|  | 27 | C | 2.218325 | 0.000000 |          |          |          |
|  | 28 | C | 4.420300 | 3.294077 | 0.000000 |          |          |

|  |      |          |          |          |          |          |
|--|------|----------|----------|----------|----------|----------|
|  | 29 O | 5.418267 | 4.194421 | 1.153010 | 0.000000 |          |
|  | 30 C | 4.864387 | 5.287913 | 3.418775 | 3.969999 | 0.000000 |
|  | 31 O | 5.912977 | 6.264873 | 4.116525 | 4.536599 | 1.146864 |
|  | 32 C | 2.855559 | 4.225404 | 4.261026 | 5.200786 | 2.585122 |
|  | 33 O | 3.089250 | 4.744471 | 5.225923 | 6.230241 | 3.496840 |
|  |      | 31       | 32       | 33       |          |          |
|  | 31 O | 0.000000 |          |          |          |          |
|  | 32 C | 3.495733 | 0.000000 |          |          |          |
|  | 33 O | 4.219728 | 1.147463 | 0.000000 |          |          |

Table S6. Distance matrix for the lowest energy MePCp<sub>2</sub>Ru<sub>2</sub>(CO)<sub>4</sub> structures as optimized at the PBE0/def2TZVP level. Included are the ranking order, spin multiplicity (S, T or Q), total energy (in a.u.), relative energy (in kcal/mol), symmetry point group Wiberg bond indices for the Fe-Fe bonds, Mulliken charges and the spin density (Cp moieties are omitted for clarity).

|                                                                                    |           |          |          |          |          |          |  |
|------------------------------------------------------------------------------------|-----------|----------|----------|----------|----------|----------|--|
| 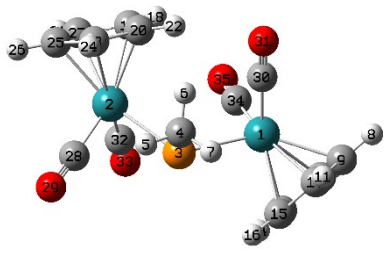 |           | 1        | 2        | 3        | 4        | 5        |  |
|                                                                                    | 1 Ru      | 0.000000 |          |          |          |          |  |
|                                                                                    | 2 Ru      | 4.202078 | 0.000000 |          |          |          |  |
|                                                                                    | 3 P       | 2.451225 | 2.454570 | 0.000000 |          |          |  |
|                                                                                    | 4 C       | 3.431563 | 3.356901 | 1.862661 | 0.000000 |          |  |
|                                                                                    | 5 H       | 4.420649 | 3.449647 | 2.434245 | 1.093947 | 0.000000 |  |
|                                                                                    | 6 H       | 3.667106 | 3.484658 | 2.540037 | 1.091865 | 1.770982 |  |
|                                                                                    | 7 H       | 3.453488 | 4.368403 | 2.440159 | 1.094445 | 1.767822 |  |
|                                                                                    | 8 H       | 2.991684 | 7.157030 | 5.299664 | 5.746560 | 6.797240 |  |
|                                                                                    | 9 C       | 2.273703 | 6.465812 | 4.478596 | 5.109699 | 6.114377 |  |
|                                                                                    | 10 C      | 2.266503 | 6.148566 | 4.360766 | 5.468245 | 6.398470 |  |
|                                                                                    | 11 H      | 3.001274 | 6.505281 | 4.190098 | 4.066660 | 4.956009 |  |
|                                                                                    | 12 H      | 2.980282 | 6.604696 | 5.110405 | 6.343142 | 7.278076 |  |
|                                                                                    | 13 C      | 2.276109 | 5.535591 | 3.584405 | 4.860159 | 5.638568 |  |
|                                                                                    | 14 H      | 3.000226 | 5.495567 | 3.809602 | 5.329465 | 5.977035 |  |
|                                                                                    | 15 C      | 2.291300 | 5.511408 | 3.186988 | 3.999965 | 4.760869 |  |
|                                                                                    | 16 H      | 2.984954 | 5.390726 | 3.008809 | 3.685505 | 4.243111 |  |
|                                                                                    | 17 C      | 2.273007 | 6.082633 | 3.798593 | 4.162194 | 5.085689 |  |
|                                                                                    | 18 H      | 4.514806 | 3.001933 | 4.362097 | 5.149183 | 5.682037 |  |
|                                                                                    | 19 C      | 4.697584 | 2.272917 | 3.992494 | 4.582825 | 4.955122 |  |
| 20 C                                                                               | 4.432126  | 2.279237 | 3.497595 | 3.534249 | 3.891685 |          |  |
| 21 H                                                                               | 6.436451  | 2.987088 | 5.334930 | 6.157276 | 6.233968 |          |  |
| 22 H                                                                               | 3.967156  | 3.008114 | 3.458390 | 3.215399 | 3.796557 |          |  |
| 23 C                                                                               | 5.390446  | 2.259036 | 3.841799 | 3.617650 | 3.557031 |          |  |
| 24 H                                                                               | 5.804163  | 2.990609 | 4.107586 | 3.403286 | 3.132561 |          |  |
| 25 C                                                                               | -0.000036 | 6.129307 | 2.260619 | 4.502195 | 4.713837 | 4.557378 |  |
| 27 C                                                                               | -0.006075 | 7.043340 | 2.976564 | 5.206439 | 5.356349 | 4.998979 |  |
| 28 C                                                                               | -0.014735 | 5.767880 | 2.268334 | 4.581219 | 5.203830 | 5.298776 |  |
| 29 O                                                                               | -0.123181 | 5.169710 | 1.850264 | 2.852098 | 3.535833 | 3.122811 |  |

1S -1410.661647 0.00 C1  
WBI 0.02

Charge densities  
1

|      |           |      |          |          |          |          |
|------|-----------|------|----------|----------|----------|----------|
| 30 C | -0.068962 |      |          |          |          |          |
| 31 O | -0.150146 |      |          |          |          |          |
| 32 C | -0.024772 |      |          |          |          |          |
| 33 O | -0.123665 |      |          |          |          |          |
| 34 C | -0.036297 |      |          |          |          |          |
| 35 O | -0.138977 |      |          |          |          |          |
|      |           | 29 O | 6.004147 | 2.993553 | 3.609762 | 4.098599 |
|      |           | 30 C | 1.839202 | 4.306574 | 3.049586 | 3.140750 |
|      |           | 31 O | 2.986973 | 4.775668 | 3.864000 | 3.499067 |
|      |           | 32 C | 4.163776 | 1.853819 | 2.928376 | 4.516857 |
|      |           | 33 O | 4.556994 | 2.997399 | 3.702160 | 5.442459 |
|      |           | 34 C | 1.846823 | 3.705867 | 3.104847 | 4.425936 |
|      |           | 35 O | 2.991299 | 3.907728 | 3.958273 | 5.319978 |
|      |           |      | 6        | 7        | 8        | 9        |
|      |           | 6 H  | 0.000000 |          |          |          |
|      |           | 7 H  | 1.769353 | 0.000000 |          |          |
|      |           | 8 H  | 5.825130 | 5.299258 | 0.000000 |          |
|      |           | 9 C  | 5.359681 | 4.678880 | 1.079063 | 0.000000 |
|      |           | 10 C | 5.837924 | 5.228965 | 2.225414 | 1.411158 |
|      |           | 11 H | 4.417776 | 3.246150 | 2.701139 | 2.241475 |
|      |           | 12 H | 6.641037 | 6.200498 | 2.679547 | 2.222619 |
|      |           | 13 C | 5.465488 | 4.641074 | 3.346991 | 2.303136 |
|      |           | 14 H | 6.016277 | 5.243096 | 4.356398 | 3.345520 |
|      |           | 15 C | 4.686084 | 3.538380 | 3.343143 | 2.300454 |
|      |           | 16 H | 4.555334 | 3.183941 | 4.354253 | 3.344288 |
|      |           | 17 C | 4.585372 | 3.544418 | 2.242862 | 1.429997 |
|      |           | 18 H | 4.744723 | 6.008401 | 6.854684 | 6.531219 |
|      |           | 19 C | 4.172068 | 5.546774 | 7.260877 | 6.856232 |
|      |           | 20 C | 2.939054 | 4.504866 | 6.945894 | 6.558768 |
|      |           | 21 H | 5.957530 | 7.199250 | 9.161669 | 8.640605 |
|      |           | 22 H | 2.419979 | 4.024584 | 6.199375 | 5.917930 |
|      |           | 23 C | 3.153077 | 4.682005 | 8.044082 | 7.560876 |
|      |           | 24 H | 2.899083 | 4.406481 | 8.351696 | 7.872671 |
|      |           | 25 C | 4.440662 | 5.806677 | 8.928986 | 8.383378 |
|      |           | 26 H | 5.175613 | 6.444091 | 9.897111 | 9.303141 |
|      |           | 27 C | 4.930199 | 6.256804 | 8.506339 | 8.001993 |
|      |           | 28 C | 4.048353 | 4.445056 | 8.115533 | 7.280579 |
|      |           | 29 O | 4.742939 | 4.876400 | 8.877472 | 7.988521 |
|      |           | 30 C | 2.804870 | 3.259199 | 3.459432 | 3.242220 |
|      |           | 31 O | 2.819644 | 3.650145 | 4.132664 | 4.138607 |
|      |           | 32 C | 4.881188 | 5.323182 | 7.058927 | 6.265068 |
|      |           | 33 O | 5.882389 | 6.138952 | 7.261496 | 6.435311 |
|      |           | 34 C | 4.466471 | 4.825820 | 4.125846 | 3.623122 |
|      |           | 35 O | 5.275979 | 5.841522 | 5.005781 | 4.604523 |
|      |           |      | 11       | 12       | 13       | 14       |
|      |           | 11 H | 0.000000 |          |          |          |
|      |           | 12 H | 4.347969 | 0.000000 |          |          |
|      |           | 13 C | 3.338107 | 2.239373 | 0.000000 |          |
|      |           | 14 H | 4.345940 | 2.701241 | 1.078782 | 0.000000 |
|      |           | 15 C | 2.227258 | 3.337618 | 1.415364 | 2.228009 |
|      |           | 16 H | 2.684894 | 4.345590 | 2.221868 | 2.675794 |
|      |           | 17 C | 1.079426 | 3.338409 | 2.295585 | 3.337497 |

|  |    |   |          |          |          |          |          |  |  |
|--|----|---|----------|----------|----------|----------|----------|--|--|
|  | 18 | H | 7.243215 | 6.325730 | 6.296024 | 6.431859 | 6.619574 |  |  |
|  | 19 | C | 7.252333 | 6.875217 | 6.506453 | 6.631961 | 6.649443 |  |  |
|  | 20 | C | 6.545500 | 7.031764 | 6.422757 | 6.709503 | 6.264112 |  |  |
|  | 21 | H | 9.113481 | 8.296243 | 7.830546 | 7.669142 | 8.133641 |  |  |
|  | 22 | H | 5.822563 | 6.638994 | 6.125520 | 6.577642 | 5.858034 |  |  |
|  | 23 | C | 7.257216 | 8.108061 | 7.193888 | 7.388952 | 6.904240 |  |  |
|  | 24 | H | 7.258405 | 8.665802 | 7.589574 | 7.849402 | 7.104961 |  |  |
|  | 25 | C | 8.302040 | 8.600481 | 7.726828 | 7.736664 | 7.633292 |  |  |
|  | 26 | H | 9.119769 | 9.509106 | 8.506032 | 8.441049 | 8.380237 |  |  |
|  | 27 | C | 8.298982 | 7.912536 | 7.341842 | 7.301844 | 7.492113 |  |  |
|  | 28 | C | 6.947351 | 7.537660 | 6.000672 | 5.814565 | 5.779911 |  |  |
|  | 29 | O | 7.468846 | 8.300124 | 6.572601 | 6.317946 | 6.255523 |  |  |
|  | 30 | C | 3.400406 | 4.380196 | 4.065494 | 4.837657 | 3.751960 |  |  |
|  | 31 | O | 4.058207 | 5.377670 | 5.196163 | 5.985196 | 4.793541 |  |  |
|  | 32 | C | 6.767735 | 5.828243 | 4.856366 | 4.501249 | 5.252173 |  |  |
|  | 33 | O | 7.191843 | 5.630179 | 4.786388 | 4.216503 | 5.438028 |  |  |
|  | 34 | C | 4.822122 | 3.242278 | 3.299563 | 3.580697 | 3.884407 |  |  |
|  | 35 | O | 5.951387 | 3.817758 | 4.212512 | 4.307862 | 4.959682 |  |  |
|  |    |   | 16       | 17       | 18       | 19       | 20       |  |  |
|  | 16 | H | 0.000000 |          |          |          |          |  |  |
|  | 17 | C | 2.227294 | 0.000000 |          |          |          |  |  |
|  | 18 | H | 6.967859 | 6.741483 | 0.000000 |          |          |  |  |
|  | 19 | C | 6.839518 | 6.843110 | 1.078698 | 0.000000 |          |  |  |
|  | 20 | C | 6.362813 | 6.328526 | 2.228895 | 1.414893 | 0.000000 |  |  |
|  | 21 | H | 8.188561 | 8.605602 | 2.695749 | 2.240015 | 3.340983 |  |  |
|  | 22 | H | 6.045754 | 5.703281 | 2.684041 | 2.225471 | 1.077894 |  |  |
|  | 23 | C | 6.787554 | 7.118627 | 3.339109 | 2.296280 | 1.417488 |  |  |
|  | 24 | H | 6.880786 | 7.268254 | 4.347987 | 3.338621 | 2.230622 |  |  |
|  | 25 | C | 7.499903 | 8.026848 | 3.338284 | 2.297042 | 2.298286 |  |  |
|  | 26 | H | 8.140706 | 8.864563 | 4.349184 | 3.341440 | 3.341206 |  |  |
|  | 27 | C | 7.527814 | 7.877678 | 2.239136 | 1.428759 | 2.298541 |  |  |
|  | 28 | C | 5.318432 | 6.603249 | 4.841002 | 4.056795 | 3.833667 |  |  |
|  | 29 | O | 5.624365 | 7.179204 | 5.979018 | 5.175834 | 4.890957 |  |  |
|  | 30 | C | 4.292410 | 3.201068 | 4.080311 | 4.189476 | 3.578675 |  |  |
|  | 31 | O | 5.272685 | 4.091956 | 4.236384 | 4.290564 | 3.492184 |  |  |
|  | 32 | C | 5.223757 | 6.085895 | 3.472807 | 3.246601 | 3.805532 |  |  |
|  | 33 | O | 5.467652 | 6.387980 | 4.164422 | 4.152905 | 4.862673 |  |  |
|  | 34 | C | 4.517699 | 4.046012 | 3.143923 | 3.633185 | 3.921213 |  |  |
|  | 35 | O | 5.575155 | 5.159374 | 2.661234 | 3.398857 | 4.077254 |  |  |
|  |    |   | 21       | 22       | 23       | 24       | 25       |  |  |
|  | 21 | H | 0.000000 |          |          |          |          |  |  |
|  | 22 | H | 4.350102 | 0.000000 |          |          |          |  |  |
|  | 23 | C | 3.343229 | 2.226388 | 0.000000 |          |          |  |  |
|  | 24 | H | 4.352094 | 2.683134 | 1.078959 | 0.000000 |          |  |  |
|  | 25 | C | 2.224222 | 3.340301 | 1.428880 | 2.241695 | 0.000000 |  |  |
|  | 26 | H | 2.680114 | 4.349778 | 2.239682 | 2.698683 | 1.079536 |  |  |

|                                                                                                                                                                                                                                                                                                  |                                                                                                                                                                                                                                                                                                                                                                                                                                                                                                                                                                                                                                                                                                                                                                                                                                                                                                                                                                                                                                                                                                                                                                                              |
|--------------------------------------------------------------------------------------------------------------------------------------------------------------------------------------------------------------------------------------------------------------------------------------------------|----------------------------------------------------------------------------------------------------------------------------------------------------------------------------------------------------------------------------------------------------------------------------------------------------------------------------------------------------------------------------------------------------------------------------------------------------------------------------------------------------------------------------------------------------------------------------------------------------------------------------------------------------------------------------------------------------------------------------------------------------------------------------------------------------------------------------------------------------------------------------------------------------------------------------------------------------------------------------------------------------------------------------------------------------------------------------------------------------------------------------------------------------------------------------------------------|
|                                                                                                                                                                                                                                                                                                  | 27 C 1.079237 3.340979 2.299145 3.341183 1.410853<br>28 C 4.200770 4.480679 3.234747 3.488644 3.123867<br>29 O 5.128484 5.503531 4.130065 4.174512 3.983412<br>30 C 6.298012 2.758945 4.676494 4.984809 5.694285<br>31 O 6.509232 2.475956 4.595564 4.803461 5.746362<br>32 C 3.385957 4.416997 4.063824 4.843368 3.734741<br>33 O 4.039687 5.426522 5.191896 5.986090 4.768285<br>34 C 5.183099 3.737863 5.054378 5.772125 5.461206<br>35 O 4.677510 4.082549 5.241004 6.104437 5.404104<br>26    27    28    29    30<br>26 H 0.000000<br>27 C 2.223844 0.000000<br>28 C 3.266748 3.664983 0.000000<br>29 O 3.869117 4.672727 1.143755 0.000000<br>30 C 6.686729 5.456549 5.534449 6.458987 0.000000<br>31 O 6.747726 5.600191 6.069077 7.004523 1.148072<br>32 C 4.296415 3.204433 2.612129 3.526119 4.929769<br>33 O 5.261124 4.093711 3.514457 4.243420 5.609536<br>34 C 6.425788 4.715440 5.104221 6.109042 2.604376<br>35 O 6.361357 4.407182 5.457666 6.509558 3.515402<br>31    32    33    34    35<br>31 O 0.000000<br>32 C 5.686657 0.000000<br>33 O 6.467167 1.143773 0.000000<br>34 C 3.516554 3.329094 3.604650 0.000000<br>35 O 4.241724 3.325179 3.457642 1.145918 0.000000 |
| 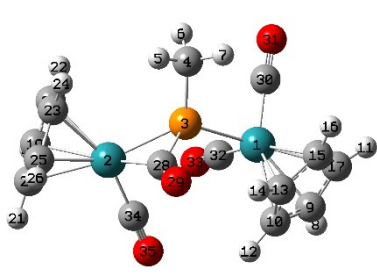 <p>2S -1410.643481 11.4 C1<br/>WBI 0.04</p> <p>Charge densities</p> <p>1</p> <p>1 Ru 0.303141<br/>2 Ru 0.494750<br/>3 P 0.056128<br/>4 C -0.003370<br/>9 C 0.009567<br/>10 C -0.000651<br/>13 C 0.116850</p> | <p>1 2 3 4 5</p> <p>1 Ru 0.000000<br/>2 Ru 4.276910 0.000000<br/>3 P 2.374708 2.328655 0.000000<br/>4 C 3.526801 3.517893 1.835987 0.000000<br/>5 H 4.460518 3.407814 2.414794 1.091493 0.000000<br/>6 H 3.841638 3.986117 2.447016 1.091891 1.771729<br/>7 H 3.551804 4.402496 2.449214 1.091841 1.779046<br/>8 H 2.966388 6.427618 5.117580 6.472945 7.354796<br/>9 C 2.247635 5.859841 4.358916 5.633896 6.494520<br/>10 C 2.259309 4.877151 3.655919 5.110355 5.798950<br/>11 H 2.972922 7.200757 5.184223 5.824950 6.818510<br/>12 H 2.985317 4.627790 3.945028 5.592989 6.160198<br/>13 C 2.287380 4.804903 3.227427 4.314803 4.954795<br/>14 H 2.999075 4.439429 3.114357 4.094447 4.517495<br/>15 C 2.265478 5.726493 3.733623 4.390247 5.205475<br/>16 H 3.002759 6.211544 4.092000 4.295334 5.071181<br/>17 C 2.249743 6.313992 4.398257 5.246171 6.176808<br/>18 H 6.277537 3.050997 4.784852 5.674945 5.588341<br/>19 C 6.066074 2.314634 4.263422 5.049570 4.810800</p>                                                                                                                                                                                                         |

|      |           |      |          |          |          |          |          |
|------|-----------|------|----------|----------|----------|----------|----------|
| 15 C | -0.016963 | 20 C | 5.823775 | 2.297772 | 3.747118 | 4.050320 | 3.680492 |
| 17 C | -0.003203 | 21 H | 6.920379 | 2.953249 | 5.264325 | 6.380025 | 6.056508 |
| 19 C | -0.025201 | 22 H | 5.818349 | 3.024285 | 3.871392 | 3.856399 | 3.599197 |
| 20 C | 0.016949  | 23 C | 6.071011 | 2.247610 | 3.765374 | 3.917267 | 3.245378 |
| 23 C | -0.100917 | 24 H | 6.322087 | 2.982881 | 3.950660 | 3.633407 | 2.741672 |
| 25 C | -0.000307 | 25 C | 6.444410 | 2.225491 | 4.289905 | 4.885185 | 4.284090 |
| 27 C | -0.050529 | 26 H | 6.976297 | 2.942870 | 4.850188 | 5.410934 | 4.722035 |
| 28 C | 0.014348  | 27 C | 6.414235 | 2.235445 | 4.541863 | 5.468117 | 5.094096 |
| 29 O | -0.292411 | 28 C | 3.673531 | 1.963142 | 1.867680 | 2.971328 | 2.912098 |
| 30 C | -0.034749 | 29 O | 4.319157 | 3.033625 | 2.866944 | 3.678070 | 3.509821 |
| 31 O | -0.108790 | 30 C | 1.857252 | 5.118100 | 3.005998 | 3.243861 | 4.329810 |
| 32 C | 0.021809  | 31 O | 2.999538 | 5.898115 | 3.835296 | 3.597725 | 4.658599 |
| 33 O | -0.092793 | 32 C | 1.863441 | 4.074475 | 2.973289 | 4.348663 | 5.194739 |
| 34 C | -0.130451 | 33 O | 3.002400 | 4.376960 | 3.785965 | 5.144257 | 5.912972 |
| 35 O | -0.173206 | 34 C | 3.926665 | 1.842204 | 2.982457 | 4.692029 | 4.876177 |
|      |           | 35 O | 4.161458 | 2.994065 | 3.828578 | 5.628454 | 5.913503 |
|      |           |      | 6        | 7        | 8        | 9        | 10       |
|      |           | 6 H  | 0.000000 |          |          |          |          |
|      |           | 7 H  | 1.776841 | 0.000000 |          |          |          |
|      |           | 8 H  | 6.794567 | 6.400273 | 0.000000 |          |          |
|      |           | 9 C  | 6.058392 | 5.478685 | 1.079470 | 0.000000 |          |
|      |           | 10 C | 5.732265 | 5.045116 | 2.240433 | 1.429798 | 0.000000 |
|      |           | 11 H | 6.075804 | 5.355874 | 2.682039 | 2.225861 | 3.345241 |
|      |           | 12 H | 6.238345 | 5.686961 | 2.701035 | 2.243777 | 1.079337 |
|      |           | 13 C | 5.080180 | 4.035895 | 3.342804 | 2.300116 | 1.418189 |
|      |           | 14 H | 5.017589 | 3.840093 | 4.353129 | 3.344401 | 2.227358 |
|      |           | 15 C | 4.992265 | 3.862761 | 3.344042 | 2.299498 | 2.297257 |
|      |           | 16 H | 4.902663 | 3.536027 | 4.353077 | 3.341623 | 3.339568 |
|      |           | 17 C | 5.639594 | 4.850981 | 2.225689 | 1.412698 | 2.301126 |
|      |           | 18 H | 5.588740 | 6.728923 | 8.081814 | 7.842717 | 7.163711 |
|      |           | 19 C | 5.099976 | 6.101805 | 8.087427 | 7.713041 | 6.898794 |
|      |           | 20 C | 4.032663 | 5.126524 | 8.239804 | 7.730020 | 6.950183 |
|      |           | 21 H | 6.738130 | 7.302358 | 8.444146 | 8.097168 | 7.037129 |
|      |           | 22 H | 3.555993 | 4.940382 | 8.363500 | 7.868916 | 7.253259 |
|      |           | 23 C | 4.213880 | 4.883809 | 8.543280 | 7.900591 | 6.938343 |
|      |           | 24 H | 3.971116 | 4.498620 | 8.962499 | 8.227287 | 7.276481 |
|      |           | 25 C | 5.343321 | 5.778031 | 8.574214 | 7.980804 | 6.869914 |
|      |           | 26 H | 6.012855 | 6.182400 | 9.005797 | 8.360470 | 7.140352 |
|      |           | 27 C | 5.781225 | 6.431832 | 8.269632 | 7.839038 | 6.817135 |
|      |           | 28 C | 3.875504 | 3.437053 | 5.866113 | 5.053763 | 3.894952 |
|      |           | 29 O | 4.702848 | 3.866426 | 6.238945 | 5.349843 | 4.075275 |
|      |           | 30 C | 3.075816 | 3.178481 | 4.254746 | 3.697302 | 4.059552 |
|      |           | 31 O | 3.133623 | 3.476701 | 5.206197 | 4.719087 | 5.181412 |
|      |           | 32 C | 4.358775 | 4.762077 | 3.277486 | 3.132684 | 3.249496 |
|      |           | 33 O | 5.019790 | 5.692309 | 3.898837 | 4.004448 | 4.153507 |
|      |           | 34 C | 5.181477 | 5.385725 | 5.263763 | 4.888090 | 3.877740 |

|    |   |          |          |          |          |          |
|----|---|----------|----------|----------|----------|----------|
| 35 | O | 6.112560 | 6.221753 | 4.788473 | 4.591902 | 3.634663 |
|    |   | 11       | 12       | 13       | 14       | 15       |
| 11 | H | 0.000000 |          |          |          |          |
| 12 | H | 4.355197 | 0.000000 |          |          |          |
| 13 | C | 3.343370 | 2.230612 | 0.000000 |          |          |
| 14 | H | 4.357290 | 2.680627 | 1.081462 | 0.000000 |          |
| 15 | C | 2.243002 | 3.339560 | 1.415049 | 2.230503 | 0.000000 |
| 16 | H | 2.701724 | 4.347859 | 2.227468 | 2.687102 | 1.078988 |
| 17 | C | 1.079391 | 3.344116 | 2.300734 | 3.347431 | 1.431052 |
| 18 | H | 9.191127 | 6.792158 | 7.451210 | 7.311970 | 8.229012 |
| 19 | C | 9.033836 | 6.556494 | 7.011779 | 6.736632 | 7.839272 |
| 20 | C | 8.761942 | 6.805483 | 6.802780 | 6.472877 | 7.475920 |
| 21 | H | 9.785390 | 6.407343 | 7.271457 | 6.848504 | 8.392853 |
| 22 | H | 8.669760 | 7.239340 | 7.069390 | 6.841322 | 7.553910 |
| 23 | C | 8.948262 | 6.785982 | 6.587888 | 6.046608 | 7.360911 |
| 24 | H | 9.068667 | 7.246099 | 6.721933 | 6.108152 | 7.386446 |
| 25 | C | 9.322581 | 6.510815 | 6.664318 | 6.053754 | 7.657685 |
| 26 | H | 9.745454 | 6.738621 | 6.852055 | 6.111169 | 7.926698 |
| 27 | C | 9.346653 | 6.336032 | 6.898601 | 6.461129 | 7.918413 |
| 28 | C | 6.248660 | 3.851630 | 3.374020 | 2.727171 | 4.372531 |
| 29 | O | 6.514231 | 4.029143 | 3.343631 | 2.410762 | 4.426069 |
| 30 | C | 3.317795 | 4.839822 | 3.816203 | 4.422471 | 3.225031 |
| 31 | O | 3.942613 | 5.980267 | 4.865649 | 5.429103 | 4.116487 |
| 32 | C | 4.210893 | 3.490508 | 3.852755 | 4.474347 | 4.067510 |
| 33 | O | 5.144530 | 4.188527 | 4.911124 | 5.495519 | 5.186675 |
| 34 | C | 6.653106 | 3.318746 | 4.302777 | 4.159069 | 5.403991 |
| 35 | O | 6.585865 | 2.844876 | 4.395148 | 4.405379 | 5.541579 |
|    |   | 16       | 17       | 18       | 19       | 20       |
| 16 | H | 0.000000 |          |          |          |          |
| 17 | C | 2.242940 | 0.000000 |          |          |          |
| 18 | H | 8.795325 | 8.459593 | 0.000000 |          |          |
| 19 | C | 8.330737 | 8.245772 | 1.078828 | 0.000000 |          |
| 20 | C | 7.800995 | 8.024650 | 2.221843 | 1.406208 | 0.000000 |
| 21 | H | 8.988581 | 8.855359 | 2.700183 | 2.239887 | 3.328708 |
| 22 | H | 7.812499 | 8.039255 | 2.674724 | 2.217060 | 1.079663 |
| 23 | C | 7.593131 | 8.131509 | 3.344012 | 2.300193 | 1.426570 |
| 24 | H | 7.465189 | 8.286608 | 4.350499 | 3.340551 | 2.238344 |
| 25 | C | 8.012716 | 8.409692 | 3.356800 | 2.315143 | 2.306694 |
| 26 | H | 8.244472 | 8.785332 | 4.365711 | 3.357531 | 3.350830 |
| 27 | C | 8.427177 | 8.450845 | 2.244381 | 1.430464 | 2.286325 |
| 28 | C | 4.731357 | 5.288664 | 5.010783 | 4.244756 | 3.918056 |
| 29 | O | 4.683172 | 5.519446 | 6.069342 | 5.249298 | 4.928212 |
| 30 | C | 3.464105 | 3.148792 | 6.708771 | 6.551449 | 6.025947 |
| 31 | O | 4.137988 | 4.019768 | 7.234732 | 7.111351 | 6.453787 |
| 32 | C | 4.857245 | 3.671153 | 5.183164 | 5.275333 | 5.333804 |
| 33 | O | 5.992162 | 4.684771 | 4.778379 | 5.099238 | 5.365923 |



|                                                                                                                                 |      |          |          |          |          |          |
|---------------------------------------------------------------------------------------------------------------------------------|------|----------|----------|----------|----------|----------|
|                                                                                                                                 | 34 C | 6.157292 | 5.709551 | 3.630141 | 3.330173 | 3.876153 |
|                                                                                                                                 | 35 O | 6.424666 | 5.642911 | 4.356068 | 4.248307 | 4.953846 |
|                                                                                                                                 |      | 21       | 22       | 23       | 24       | 25       |
|                                                                                                                                 | 21 H | 0.000000 |          |          |          |          |
|                                                                                                                                 | 22 H | 4.340195 | 0.000000 |          |          |          |
|                                                                                                                                 | 23 C | 3.332408 | 2.235805 | 0.000000 |          |          |
|                                                                                                                                 | 24 H | 4.343166 | 2.691639 | 1.079329 | 0.000000 |          |
|                                                                                                                                 | 25 C | 2.226129 | 3.348839 | 1.424503 | 2.235814 | 0.000000 |
|                                                                                                                                 | 26 H | 2.683474 | 4.360058 | 2.240174 | 2.698880 | 1.078550 |
|                                                                                                                                 | 27 C | 1.079702 | 3.331189 | 2.288999 | 3.332950 | 1.418360 |
|                                                                                                                                 | 28 C | 4.484524 | 4.474766 | 3.352189 | 3.546198 | 3.362567 |
|                                                                                                                                 | 29 O | 5.145762 | 5.533589 | 4.122693 | 4.149312 | 3.959246 |
|                                                                                                                                 | 30 C | 7.888692 | 5.687373 | 6.441532 | 6.532876 | 7.167104 |
|                                                                                                                                 | 31 O | 8.657504 | 5.939320 | 6.943173 | 6.942566 | 7.829140 |
|                                                                                                                                 | 32 C | 6.265352 | 5.287963 | 5.967044 | 6.476640 | 6.275419 |
|                                                                                                                                 | 33 O | 6.132721 | 5.296579 | 6.208577 | 6.847530 | 6.461759 |
|                                                                                                                                 | 34 C | 3.210094 | 4.542592 | 4.020201 | 4.802318 | 3.580875 |
|                                                                                                                                 | 35 O | 3.816633 | 5.593820 | 5.148417 | 5.944784 | 4.590750 |
|                                                                                                                                 |      | 26       | 27       | 28       | 29       | 30       |
|                                                                                                                                 | 26 H | 0.000000 |          |          |          |          |
|                                                                                                                                 | 27 C | 2.232838 | 0.000000 |          |          |          |
|                                                                                                                                 | 28 C | 3.555596 | 3.909026 | 0.000000 |          |          |
|                                                                                                                                 | 29 O | 3.827656 | 4.686616 | 1.191726 | 0.000000 |          |
|                                                                                                                                 | 30 C | 7.825297 | 7.203889 | 4.745442 | 5.489190 | 0.000000 |
|                                                                                                                                 | 31 O | 8.534985 | 7.899269 | 5.629725 | 6.386183 | 1.142678 |
|                                                                                                                                 | 32 C | 6.996113 | 5.854336 | 4.329674 | 5.251794 | 2.627614 |
|                                                                                                                                 | 33 O | 7.267176 | 5.807690 | 5.051078 | 6.048952 | 3.530794 |
|                                                                                                                                 | 34 C | 4.080037 | 3.082163 | 2.619426 | 3.456655 | 5.258288 |
|                                                                                                                                 | 35 O | 4.993768 | 3.953891 | 3.499214 | 4.142275 | 5.685866 |
|                                                                                                                                 |      | 31       | 32       | 33       | 34       | 35       |
|                                                                                                                                 | 31 O | 0.000000 |          |          |          |          |
|                                                                                                                                 | 32 C | 3.537479 | 0.000000 |          |          |          |
|                                                                                                                                 | 33 O | 4.258036 | 1.139141 | 0.000000 |          |          |
|                                                                                                                                 | 34 C | 6.231721 | 3.457891 | 3.653171 | 0.000000 |          |
|                                                                                                                                 | 35 O | 6.721761 | 3.564601 | 3.652360 | 1.152128 | 0.000000 |
|                                                                                                                                 |      | 1        | 2        | 3        | 4        | 5        |
|                                                                                                                                 | 1 Ru | 0.000000 |          |          |          |          |
|                                                                                                                                 | 2 Ru | 2.866983 | 0.000000 |          |          |          |
|                                                                                                                                 | 3 P  | 2.394413 | 3.015917 | 0.000000 |          |          |
|                                                                                                                                 | 4 C  | 3.516070 | 4.544319 | 1.851914 | 0.000000 |          |
|                                                                                                                                 | 5 H  | 3.641185 | 4.631560 | 2.496533 | 1.090294 | 0.000000 |
|                                                                                                                                 | 6 H  | 4.471719 | 5.043442 | 2.421737 | 1.092549 | 1.774560 |
|                                                                                                                                 | 7 H  | 3.713975 | 5.294384 | 2.437382 | 1.092368 | 1.777915 |
|                                                                                                                                 | 8 H  | 2.987787 | 4.218278 | 4.940091 | 6.370083 | 6.619367 |
|                                                                                                                                 | 9 C  | 2.271144 | 4.176948 | 4.242293 | 5.521186 | 5.803648 |
|                                                                                                                                 | 10 C | 2.244380 | 4.752995 | 4.454353 | 5.311418 | 5.404602 |
| 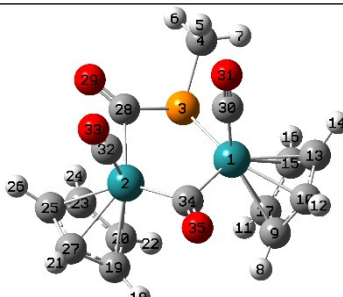 <p>3S -1410.629176 20.4 C1<br/>WBI 0.32</p> |      |          |          |          |          |          |

| Charges and spin densities |    | 11        | 12 | 13 | 14       | 15       | 16       | 17       | 18       | 19 | 20 | 21 | 22 | 23 | 24 | 25 | 26 | 27 | 28 | 29 | 30 | 31 | 32 | 33 | 34 | 35 |
|----------------------------|----|-----------|----|----|----------|----------|----------|----------|----------|----|----|----|----|----|----|----|----|----|----|----|----|----|----|----|----|----|
| 1                          | Ru | 0.231741  |    |    |          |          |          |          |          |    |    |    |    |    |    |    |    |    |    |    |    |    |    |    |    |    |
| 2                          | Ru | 0.287587  |    |    |          |          |          |          |          |    |    |    |    |    |    |    |    |    |    |    |    |    |    |    |    |    |
| 3                          | P  | 0.000378  |    |    |          |          |          |          |          |    |    |    |    |    |    |    |    |    |    |    |    |    |    |    |    |    |
| 4                          | C  | 0.005154  |    |    |          |          |          |          |          |    |    |    |    |    |    |    |    |    |    |    |    |    |    |    |    |    |
| 9                          | C  | 0.013966  |    |    |          |          |          |          |          |    |    |    |    |    |    |    |    |    |    |    |    |    |    |    |    |    |
| 10                         | C  | 0.035419  |    |    |          |          |          |          |          |    |    |    |    |    |    |    |    |    |    |    |    |    |    |    |    |    |
| 13                         | C  | -0.005399 |    |    |          |          |          |          |          |    |    |    |    |    |    |    |    |    |    |    |    |    |    |    |    |    |
| 15                         | C  | 0.025591  |    |    |          |          |          |          |          |    |    |    |    |    |    |    |    |    |    |    |    |    |    |    |    |    |
| 17                         | C  | -0.007771 |    |    |          |          |          |          |          |    |    |    |    |    |    |    |    |    |    |    |    |    |    |    |    |    |
| 19                         | C  | -0.002894 |    |    |          |          |          |          |          |    |    |    |    |    |    |    |    |    |    |    |    |    |    |    |    |    |
| 20                         | C  | 0.029911  |    |    |          |          |          |          |          |    |    |    |    |    |    |    |    |    |    |    |    |    |    |    |    |    |
| 23                         | C  | 0.017205  |    |    |          |          |          |          |          |    |    |    |    |    |    |    |    |    |    |    |    |    |    |    |    |    |
| 25                         | C  | 0.019550  |    |    |          |          |          |          |          |    |    |    |    |    |    |    |    |    |    |    |    |    |    |    |    |    |
| 27                         | C  | 0.027262  |    |    |          |          |          |          |          |    |    |    |    |    |    |    |    |    |    |    |    |    |    |    |    |    |
| 28                         | C  | 0.118660  |    |    |          |          |          |          |          |    |    |    |    |    |    |    |    |    |    |    |    |    |    |    |    |    |
| 29                         | O  | -0.269763 |    |    |          |          |          |          |          |    |    |    |    |    |    |    |    |    |    |    |    |    |    |    |    |    |
| 30                         | C  | -0.033938 |    |    |          |          |          |          |          |    |    |    |    |    |    |    |    |    |    |    |    |    |    |    |    |    |
| 31                         | O  | -0.127427 |    |    |          |          |          |          |          |    |    |    |    |    |    |    |    |    |    |    |    |    |    |    |    |    |
| 32                         | C  | -0.019769 |    |    |          |          |          |          |          |    |    |    |    |    |    |    |    |    |    |    |    |    |    |    |    |    |
| 33                         | O  | -0.110484 |    |    |          |          |          |          |          |    |    |    |    |    |    |    |    |    |    |    |    |    |    |    |    |    |
| 34                         | C  | -0.032170 |    |    |          |          |          |          |          |    |    |    |    |    |    |    |    |    |    |    |    |    |    |    |    |    |
| 35                         | O  | -0.202812 |    |    |          |          |          |          |          |    |    |    |    |    |    |    |    |    |    |    |    |    |    |    |    |    |
|                            |    |           | 6  | 7  | 8        | 9        | 10       |          |          |    |    |    |    |    |    |    |    |    |    |    |    |    |    |    |    |    |
|                            |    |           | 6  | H  | 0.000000 |          |          |          |          |    |    |    |    |    |    |    |    |    |    |    |    |    |    |    |    |    |
|                            |    |           | 7  | H  | 1.772305 | 0.000000 |          |          |          |    |    |    |    |    |    |    |    |    |    |    |    |    |    |    |    |    |
|                            |    |           | 8  | H  | 7.252101 | 6.413881 | 0.000000 |          |          |    |    |    |    |    |    |    |    |    |    |    |    |    |    |    |    |    |
|                            |    |           | 9  | C  | 6.440829 | 5.458266 | 1.079549 | 0.000000 |          |    |    |    |    |    |    |    |    |    |    |    |    |    |    |    |    |    |
|                            |    |           | 10 | C  | 6.343507 | 5.128561 | 2.222369 | 1.416643 | 0.000000 |    |    |    |    |    |    |    |    |    |    |    |    |    |    |    |    |    |
|                            |    |           | 11 | H  | 5.798476 | 5.073675 | 2.695459 | 2.235426 | 3.346868 |    |    |    |    |    |    |    |    |    |    |    |    |    |    |    |    |    |
|                            |    |           | 12 | H  | 7.094358 | 5.880031 | 2.676945 | 2.230385 | 1.078822 |    |    |    |    |    |    |    |    |    |    |    |    |    |    |    |    |    |
|                            |    |           | 13 | C  | 5.396083 | 3.969037 | 3.334226 | 2.291891 | 1.427384 |    |    |    |    |    |    |    |    |    |    |    |    |    |    |    |    |    |
|                            |    |           | 14 | H  | 5.420429 | 3.829542 | 4.344296 | 3.335633 | 2.238730 |    |    |    |    |    |    |    |    |    |    |    |    |    |    |    |    |    |
|                            |    |           | 15 | C  | 4.879038 | 3.602019 | 3.335885 | 2.291550 | 2.302975 |    |    |    |    |    |    |    |    |    |    |    |    |    |    |    |    |    |
|                            |    |           | 16 | H  | 4.375264 | 3.048931 | 4.346089 | 3.334793 | 3.346545 |    |    |    |    |    |    |    |    |    |    |    |    |    |    |    |    |    |
|                            |    |           | 17 | C  | 5.602016 | 4.650600 | 2.231171 | 1.418734 | 2.304383 |    |    |    |    |    |    |    |    |    |    |    |    |    |    |    |    |    |
|                            |    |           | 18 | H  | 7.649540 | 7.568465 | 3.288904 | 3.967906 | 5.103505 |    |    |    |    |    |    |    |    |    |    |    |    |    |    |    |    |    |
|                            |    |           | 19 | C  | 6.923616 | 7.055351 | 3.871485 | 4.318472 | 5.395422 |    |    |    |    |    |    |    |    |    |    |    |    |    |    |    |    |    |
|                            |    |           | 20 | C  | 5.961177 | 6.165641 | 4.086790 | 4.237066 | 5.346278 |    |    |    |    |    |    |    |    |    |    |    |    |    |    |    |    |    |
|                            |    |           | 21 | H  | 7.837377 | 8.239736 | 5.525918 | 6.018020 | 6.819907 |    |    |    |    |    |    |    |    |    |    |    |    |    |    |    |    |    |
|                            |    |           | 22 | H  | 5.945816 | 5.947852 | 3.769409 | 3.824033 | 5.033429 |    |    |    |    |    |    |    |    |    |    |    |    |    |    |    |    |    |
|                            |    |           | 23 | C  | 5.453614 | 6.059309 | 5.320591 | 5.339901 | 6.272036 |    |    |    |    |    |    |    |    |    |    |    |    |    |    |    |    |    |
|                            |    |           | 24 | H  | 4.917983 | 5.716383 | 6.004887 | 5.870819 | 6.742921 |    |    |    |    |    |    |    |    |    |    |    |    |    |    |    |    |    |
|                            |    |           | 25 | C  | 6.148076 | 6.843895 | 5.787081 | 5.945401 | 6.776229 |    |    |    |    |    |    |    |    |    |    |    |    |    |    |    |    |    |

|  |    |   |          |          |          |          |          |
|--|----|---|----------|----------|----------|----------|----------|
|  | 26 | H | 6.314849 | 7.236224 | 6.790824 | 6.907740 | 7.640307 |
|  | 27 | C | 7.025369 | 7.430940 | 5.027241 | 5.414234 | 6.303209 |
|  | 28 | C | 3.094057 | 3.799047 | 5.559435 | 5.132336 | 5.413416 |
|  | 29 | O | 3.165273 | 4.314843 | 6.725761 | 6.319552 | 6.544144 |
|  | 30 | C | 4.240144 | 3.584362 | 4.507494 | 3.859137 | 3.265693 |
|  | 31 | O | 4.498404 | 3.953388 | 5.548464 | 4.928434 | 4.174735 |
|  | 32 | C | 5.415905 | 5.808892 | 5.424000 | 5.367497 | 5.552704 |
|  | 33 | O | 5.958988 | 6.415972 | 6.339839 | 6.285557 | 6.302471 |
|  | 34 | C | 5.830904 | 5.490632 | 2.917485 | 2.928365 | 3.213968 |
|  | 35 | O | 6.945668 | 6.517520 | 2.947586 | 3.244143 | 3.427489 |
|  |    |   | 11       | 12       | 13       | 14       | 15       |
|  | 11 | H | 0.000000 |          |          |          |          |
|  | 12 | H | 4.355585 | 0.000000 |          |          |          |
|  | 13 | C | 3.339331 | 2.242953 | 0.000000 |          |          |
|  | 14 | H | 4.348059 | 2.702009 | 1.079524 | 0.000000 |          |
|  | 15 | C | 2.230717 | 3.346528 | 1.417012 | 2.228800 | 0.000000 |
|  | 16 | H | 2.684216 | 4.357356 | 2.229578 | 2.684665 | 1.079374 |
|  | 17 | C | 1.078007 | 3.346375 | 2.298725 | 3.341604 | 1.421275 |
|  | 18 | H | 4.081097 | 5.515934 | 5.952435 | 6.948570 | 5.563648 |
|  | 19 | C | 4.103261 | 5.908926 | 6.036102 | 6.992180 | 5.529644 |
|  | 20 | C | 3.354122 | 6.075228 | 5.668416 | 6.613343 | 4.880166 |
|  | 21 | H | 6.205948 | 7.088873 | 7.544027 | 8.372097 | 7.289925 |
|  | 22 | H | 2.489737 | 5.875319 | 5.255025 | 6.239053 | 4.291876 |
|  | 23 | C | 4.408454 | 6.994366 | 6.412978 | 7.242160 | 5.620993 |
|  | 24 | H | 4.651371 | 7.549121 | 6.663319 | 7.424315 | 5.742210 |
|  | 25 | C | 5.464588 | 7.327051 | 7.092000 | 7.882767 | 6.528295 |
|  | 26 | H | 6.446385 | 8.155873 | 7.890732 | 8.606348 | 7.364599 |
|  | 27 | C | 5.317630 | 6.721523 | 6.897758 | 7.757502 | 6.490697 |
|  | 28 | C | 4.793186 | 6.056019 | 5.163980 | 5.639826 | 4.723107 |
|  | 29 | O | 5.940992 | 7.134508 | 6.246528 | 6.621870 | 5.836605 |
|  | 30 | C | 4.844204 | 3.529274 | 3.085083 | 3.215726 | 3.629402 |
|  | 31 | O | 5.980602 | 4.240054 | 3.947848 | 3.814539 | 4.632974 |
|  | 32 | C | 5.892010 | 5.787179 | 5.884248 | 6.387582 | 5.925712 |
|  | 33 | O | 6.975458 | 6.394578 | 6.635760 | 7.014038 | 6.831418 |
|  | 34 | C | 4.039848 | 3.461086 | 3.925386 | 4.654442 | 4.106103 |
|  | 35 | O | 4.758202 | 3.341777 | 4.447402 | 5.141091 | 4.851559 |
|  |    |   | 16       | 17       | 18       | 19       | 20       |
|  | 16 | H | 0.000000 |          |          |          |          |
|  | 17 | C | 2.231780 | 0.000000 |          |          |          |
|  | 18 | H | 6.299905 | 4.325569 | 0.000000 |          |          |
|  | 19 | C | 6.135904 | 4.414947 | 1.079437 | 0.000000 |          |
|  | 20 | C | 5.277493 | 3.868309 | 2.239604 | 1.427091 | 0.000000 |
|  | 21 | H | 7.919676 | 6.341936 | 2.678744 | 2.223031 | 3.338363 |
|  | 22 | H | 4.627889 | 3.212621 | 2.697750 | 2.238632 | 1.078332 |
|  | 23 | C | 5.848641 | 4.866618 | 3.345328 | 2.303416 | 1.412861 |
|  | 24 | H | 5.768934 | 5.168396 | 4.354475 | 3.346427 | 2.225755 |

|  |    |   |          |          |          |          |          |
|--|----|---|----------|----------|----------|----------|----------|
|  | 25 | C | 6.881834 | 5.765650 | 3.343358 | 2.298647 | 2.288834 |
|  | 26 | H | 7.653993 | 6.714673 | 4.352361 | 3.340544 | 3.331617 |
|  | 27 | C | 7.046120 | 5.542403 | 2.219757 | 1.407311 | 2.293061 |
|  | 28 | C | 4.831667 | 4.691669 | 4.984750 | 4.161467 | 3.531571 |
|  | 29 | O | 5.849072 | 5.874936 | 5.876182 | 4.967208 | 4.381625 |
|  | 30 | C | 4.139085 | 4.057697 | 5.649322 | 5.393512 | 5.248884 |
|  | 31 | O | 5.052435 | 5.177966 | 6.599300 | 6.315231 | 6.235545 |
|  | 32 | C | 6.441111 | 5.604920 | 4.369689 | 3.776587 | 4.093610 |
|  | 33 | O | 7.342340 | 6.614830 | 5.337217 | 4.799945 | 5.208844 |
|  | 34 | C | 4.927892 | 3.547702 | 3.126799 | 3.084748 | 3.491995 |
|  | 35 | O | 5.781754 | 4.215923 | 3.261093 | 3.527636 | 4.273475 |
|  |    |   | 21       | 22       | 23       | 24       | 25       |
|  | 21 | H | 0.000000 |          |          |          |          |
|  | 22 | H | 4.346930 | 0.000000 |          |          |          |
|  | 23 | C | 3.350109 | 2.219864 | 0.000000 |          |          |
|  | 24 | H | 4.361638 | 2.673683 | 1.079034 | 0.000000 |          |
|  | 25 | C | 2.246104 | 3.329797 | 1.419819 | 2.232910 | 0.000000 |
|  | 26 | H | 2.705163 | 4.338466 | 2.231338 | 2.689464 | 1.079173 |
|  | 27 | C | 1.079240 | 3.334417 | 2.308386 | 3.352935 | 1.436378 |
|  | 28 | C | 4.759094 | 3.982699 | 2.922679 | 2.878578 | 3.235201 |
|  | 29 | O | 5.168021 | 4.935257 | 3.453743 | 3.233304 | 3.518496 |
|  | 30 | C | 6.080882 | 5.416884 | 5.444240 | 5.746069 | 5.628024 |
|  | 31 | O | 6.710539 | 6.485137 | 6.283424 | 6.546529 | 6.317357 |
|  | 32 | C | 3.310927 | 4.898853 | 3.774430 | 4.366940 | 3.115306 |
|  | 33 | O | 3.935252 | 6.037362 | 4.804893 | 5.345636 | 3.987476 |
|  | 34 | C | 3.827354 | 3.877602 | 4.078871 | 4.824354 | 4.032498 |
|  | 35 | O | 3.955035 | 4.673171 | 4.972020 | 5.820198 | 4.738756 |
|  |    |   | 26       | 27       | 28       | 29       | 30       |
|  | 26 | H | 0.000000 |          |          |          |          |
|  | 27 | C | 2.248397 | 0.000000 |          |          |          |
|  | 28 | C | 3.493042 | 4.011275 | 0.000000 |          |          |
|  | 29 | O | 3.402980 | 4.526904 | 1.195695 | 0.000000 |          |
|  | 30 | C | 6.114665 | 5.621292 | 3.267961 | 4.073691 | 0.000000 |
|  | 31 | O | 6.653807 | 6.362597 | 3.836325 | 4.372136 | 1.145739 |
|  | 32 | C | 3.279780 | 3.146799 | 2.603478 | 2.921870 | 3.400028 |
|  | 33 | O | 3.912674 | 4.012823 | 3.429650 | 3.447869 | 3.865427 |
|  | 34 | C | 4.781780 | 3.461445 | 3.471029 | 4.457422 | 2.670742 |
|  | 35 | O | 5.468205 | 3.869489 | 4.584249 | 5.495874 | 3.391033 |
|  |    |   | 31       | 32       | 33       | 34       | 35       |
|  | 31 | O | 0.000000 |          |          |          |          |
|  | 32 | C | 3.711207 | 0.000000 |          |          |          |
|  | 33 | O | 3.845242 | 1.141783 | 0.000000 |          |          |
|  | 34 | C | 3.536929 | 2.573188 | 3.429104 | 0.000000 |          |
|  | 35 | O | 4.086125 | 3.181325 | 3.800952 | 1.172710 | 0.000000 |

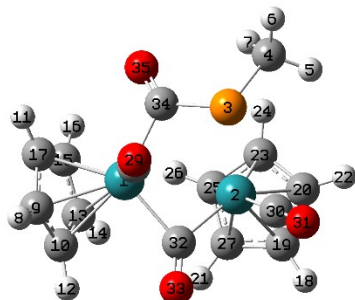

4S -1410.621176 25.40 C1  
WBI 0.32

Charges and spin densities

1

1 Ru 0.284005  
2 Ru 0.127838  
3 P 0.030399  
4 C -0.027386  
9 C 0.008262  
10 C 0.037465  
13 C -0.027731  
15 C 0.041564  
17 C -0.000452  
19 C 0.030472  
20 C -0.041876  
23 C 0.058662  
25 C 0.025493  
27 C 0.002969  
28 C -0.020575  
29 O -0.114566  
30 C 0.028796  
31 O -0.121138  
32 C 0.004105  
33 O -0.199136  
34 C 0.193387  
35 O -0.320556

|      | 1        | 2        | 3        | 4        | 5        |  |
|------|----------|----------|----------|----------|----------|--|
| 1 Ru | 0.000000 |          |          |          |          |  |
| 2 Ru | 2.827048 | 0.000000 |          |          |          |  |
| 3 P  | 3.121165 | 2.439586 | 0.000000 |          |          |  |
| 4 C  | 4.678444 | 3.512384 | 1.853588 | 0.000000 |          |  |
| 5 H  | 5.303629 | 3.542932 | 2.466565 | 1.091485 | 0.000000 |  |
| 6 H  | 5.337224 | 4.471289 | 2.423677 | 1.092659 | 1.766551 |  |
| 7 H  | 4.722009 | 3.785888 | 2.470520 | 1.091506 | 1.789783 |  |
| 8 H  | 2.962298 | 5.629754 | 5.798748 | 7.436931 | 8.157758 |  |
| 9 C  | 2.254841 | 4.950351 | 5.277461 | 6.807659 | 7.516073 |  |
| 10 C | 2.320778 | 4.435520 | 5.405161 | 6.874212 | 7.427026 |  |
| 11 H | 2.921695 | 5.580520 | 5.032795 | 6.206976 | 7.134306 |  |
| 12 H | 3.030452 | 4.707463 | 5.985367 | 7.522093 | 7.968419 |  |
| 13 C | 2.307935 | 4.017540 | 5.042831 | 6.218314 | 6.762690 |  |
| 14 H | 3.051415 | 3.995292 | 5.410961 | 6.409158 | 6.818074 |  |
| 15 C | 2.277801 | 4.379070 | 4.707835 | 5.741396 | 6.466772 |  |
| 16 H | 2.960409 | 4.605448 | 4.731210 | 5.427468 | 6.179334 |  |
| 17 C | 2.216589 | 4.912511 | 4.831380 | 6.109171 | 6.932257 |  |
| 18 H | 5.376849 | 2.932863 | 5.181338 | 5.755876 | 5.283754 |  |
| 19 C | 4.694306 | 2.217071 | 4.462030 | 4.949715 | 4.572353 |  |
| 20 C | 4.877566 | 2.212208 | 3.794744 | 3.812105 | 3.302250 |  |
| 21 H | 4.059145 | 2.973448 | 5.275569 | 6.126369 | 6.093180 |  |
| 22 H | 5.694406 | 2.944462 | 4.079366 | 3.801700 | 3.023520 |  |
| 23 C | 4.312012 | 2.280462 | 3.450983 | 3.325091 | 3.147538 |  |
| 24 H | 4.715379 | 3.009504 | 3.402519 | 2.759668 | 2.656067 |  |
| 25 C | 3.662294 | 2.294348 | 3.940475 | 4.303003 | 4.355067 |  |
| 26 H | 3.540585 | 3.037762 | 4.300247 | 4.664150 | 4.919711 |  |
| 27 C | 3.940415 | 2.251818 | 4.524148 | 5.180349 | 5.076660 |  |
| 28 C | 1.851821 | 3.614000 | 3.031979 | 4.827577 | 5.489781 |  |
| 29 O | 2.990330 | 4.496566 | 3.610848 | 5.364437 | 6.015114 |  |
| 30 C | 3.851439 | 1.841976 | 2.802837 | 4.005001 | 3.827093 |  |
| 31 O | 4.768910 | 2.984434 | 3.553020 | 4.674743 | 4.399965 |  |
| 32 C | 2.024002 | 2.032185 | 3.519587 | 5.115166 | 5.359908 |  |
| 33 O | 2.973344 | 2.986423 | 4.585740 | 6.198575 | 6.360205 |  |
| 34 C | 2.094822 | 2.883726 | 1.810360 | 2.874993 | 3.727359 |  |
| 35 O | 2.947222 | 3.864870 | 2.739339 | 3.163480 | 4.119469 |  |
|      | 6        | 7        | 8        | 9        | 10       |  |
| 6 H  | 0.000000 |          |          |          |          |  |
| 7 H  | 1.769376 | 0.000000 |          |          |          |  |
| 8 H  | 7.902512 | 7.476934 | 0.000000 |          |          |  |
| 9 C  | 7.365101 | 6.740247 | 1.079706 | 0.000000 |          |  |
| 10 C | 7.602458 | 6.771151 | 2.219162 | 1.405183 | 0.000000 |  |
| 11 H | 6.544744 | 5.966020 | 2.703995 | 2.247621 | 3.341608 |  |
| 12 H | 8.289109 | 7.503634 | 2.674361 | 2.218234 | 1.079103 |  |
| 13 C | 7.024206 | 5.926670 | 3.333155 | 2.287770 | 1.426764 |  |
| 14 H | 7.316298 | 6.056296 | 4.338883 | 3.327548 | 2.232618 |  |

|  |    |   |          |          |          |          |          |
|--|----|---|----------|----------|----------|----------|----------|
|  | 15 | C | 6.411797 | 5.342207 | 3.344872 | 2.302510 | 2.303257 |
|  | 16 | H | 6.083596 | 4.847766 | 4.350429 | 3.342664 | 3.348686 |
|  | 17 | C | 6.610728 | 5.878575 | 2.243694 | 1.434244 | 2.299953 |
|  | 18 | H | 6.757101 | 5.994925 | 7.757290 | 7.092783 | 6.130062 |
|  | 19 | C | 5.997842 | 5.066813 | 7.265023 | 6.510417 | 5.602004 |
|  | 20 | C | 4.857121 | 3.915754 | 7.719312 | 6.935132 | 6.238300 |
|  | 21 | H | 7.175469 | 6.022502 | 6.059774 | 5.233277 | 4.039083 |
|  | 22 | H | 4.739597 | 4.064793 | 8.563637 | 7.831938 | 7.209938 |
|  | 23 | C | 4.412925 | 3.066889 | 7.195410 | 6.309088 | 5.701132 |
|  | 24 | H | 3.786507 | 2.260351 | 7.616913 | 6.724250 | 6.287577 |
|  | 25 | C | 5.371724 | 3.971521 | 6.316082 | 5.364820 | 4.575123 |
|  | 26 | H | 5.667638 | 4.142716 | 5.975987 | 4.949909 | 4.214048 |
|  | 27 | C | 6.250514 | 5.084026 | 6.363209 | 5.509906 | 4.496412 |
|  | 28 | C | 5.189061 | 5.201510 | 3.116305 | 3.027026 | 3.611530 |
|  | 29 | O | 5.536970 | 5.876894 | 3.595673 | 3.805417 | 4.543149 |
|  | 30 | C | 4.717994 | 4.694063 | 6.269399 | 5.864218 | 5.509429 |
|  | 31 | O | 5.220394 | 5.506484 | 6.921624 | 6.657580 | 6.375413 |
|  | 32 | C | 5.910341 | 5.402215 | 4.049154 | 3.563081 | 3.001528 |
|  | 33 | O | 6.976507 | 6.537807 | 4.237863 | 3.942144 | 3.247460 |
|  | 34 | C | 3.447325 | 2.792821 | 4.688813 | 3.999490 | 4.244445 |
|  | 35 | O | 3.608460 | 2.702301 | 5.190949 | 4.435924 | 4.765717 |
|  |    |   | 11       | 12       | 13       | 14       | 15       |
|  | 11 | H | 0.000000 |          |          |          |          |
|  | 12 | H | 4.352370 | 0.000000 |          |          |          |
|  | 13 | C | 3.331176 | 2.239918 | 0.000000 |          |          |
|  | 14 | H | 4.342066 | 2.689632 | 1.079103 | 0.000000 |          |
|  | 15 | C | 2.230242 | 3.345039 | 1.412483 | 2.226152 | 0.000000 |
|  | 16 | H | 2.673749 | 4.358040 | 2.232733 | 2.695868 | 1.078620 |
|  | 17 | C | 1.078938 | 3.343722 | 2.288337 | 3.332273 | 1.417873 |
|  | 18 | H | 8.184162 | 5.963016 | 5.741367 | 5.229751 | 6.579937 |
|  | 19 | C | 7.394995 | 5.611327 | 5.028033 | 4.520361 | 5.738694 |
|  | 20 | C | 7.401396 | 6.458138 | 5.511432 | 5.114112 | 5.895543 |
|  | 21 | H | 6.464573 | 3.933658 | 3.456087 | 2.723778 | 4.533752 |
|  | 22 | H | 8.211510 | 7.418338 | 6.534557 | 6.181285 | 6.847533 |
|  | 23 | C | 6.472907 | 6.127745 | 4.744040 | 4.375425 | 4.902186 |
|  | 24 | H | 6.525189 | 6.845388 | 5.253625 | 4.984065 | 5.131215 |
|  | 25 | C | 5.791603 | 4.973034 | 3.537729 | 3.024219 | 3.931694 |
|  | 26 | H | 5.186244 | 4.767989 | 2.962469 | 2.444458 | 3.191697 |
|  | 27 | C | 6.438219 | 4.577299 | 3.771215 | 3.151902 | 4.578545 |
|  | 28 | C | 3.445833 | 4.104389 | 4.054684 | 4.861361 | 3.863495 |
|  | 29 | O | 4.111990 | 4.935322 | 5.137813 | 5.972215 | 4.908572 |
|  | 30 | C | 6.631013 | 5.582880 | 5.477744 | 5.581387 | 5.858215 |
|  | 31 | O | 7.472809 | 6.354326 | 6.496517 | 6.638267 | 6.885196 |
|  | 32 | C | 4.884480 | 3.021937 | 3.236961 | 3.497629 | 3.918356 |
|  | 33 | O | 5.631184 | 2.866164 | 3.811028 | 4.002814 | 4.716345 |
|  | 34 | C | 3.422596 | 5.057519 | 3.698841 | 4.217499 | 3.045860 |

|      |          |          |          |          |          |
|------|----------|----------|----------|----------|----------|
| 35 O | 3.305656 | 5.702393 | 4.000340 | 4.493364 | 3.012743 |
|      | 16       | 17       | 18       | 19       | 20       |
| 16 H | 0.000000 |          |          |          |          |
| 17 C | 2.220960 | 0.000000 |          |          |          |
| 18 H | 6.815864 | 7.337381 | 0.000000 |          |          |
| 19 C | 5.873220 | 6.582193 | 1.079166 | 0.000000 |          |
| 20 C | 5.821383 | 6.742255 | 2.245345 | 1.432598 | 0.000000 |
| 21 H | 4.858834 | 5.482250 | 2.675347 | 2.220602 | 3.340727 |
| 22 H | 6.739946 | 7.621921 | 2.704031 | 2.243844 | 1.079205 |
| 23 C | 4.644790 | 5.873609 | 3.347729 | 2.304500 | 1.420147 |
| 24 H | 4.681314 | 6.078918 | 4.358039 | 3.347454 | 2.231000 |
| 25 C | 3.801715 | 5.037402 | 3.345576 | 2.301607 | 2.294807 |
| 26 H | 2.914539 | 4.450716 | 4.356215 | 3.344535 | 3.333906 |
| 27 C | 4.738493 | 5.552340 | 2.225652 | 1.411909 | 2.297432 |
| 28 C | 4.503787 | 3.198690 | 6.235604 | 5.720586 | 5.780948 |
| 29 O | 5.542375 | 4.061421 | 7.019673 | 6.598335 | 6.621874 |
| 30 C | 6.213583 | 6.061724 | 3.245536 | 3.085823 | 3.106529 |
| 31 O | 7.285249 | 6.956208 | 3.854415 | 3.945282 | 3.975883 |
| 32 C | 4.594796 | 4.073345 | 3.830611 | 3.470788 | 4.071984 |
| 33 O | 5.507336 | 4.772322 | 3.981601 | 3.915728 | 4.787919 |
| 34 C | 2.996379 | 3.237377 | 5.760466 | 4.882078 | 4.436277 |
| 35 O | 2.580778 | 3.335670 | 6.603886 | 5.637751 | 5.071115 |
|      | 21       | 22       | 23       | 24       | 25       |
| 21 H | 0.000000 |          |          |          |          |
| 22 H | 4.349301 | 0.000000 |          |          |          |
| 23 C | 3.339874 | 2.233417 | 0.000000 |          |          |
| 24 H | 4.348427 | 2.689856 | 1.078041 | 0.000000 |          |
| 25 C | 2.243823 | 3.336837 | 1.410170 | 2.218969 | 0.000000 |
| 26 H | 2.711902 | 4.341069 | 2.215981 | 2.663047 | 1.077792 |
| 27 C | 1.079558 | 3.339625 | 2.296394 | 3.338300 | 1.429543 |
| 28 C | 5.521888 | 6.363514 | 5.466701 | 5.769094 | 5.161421 |
| 29 O | 6.542605 | 7.087076 | 6.419131 | 6.677771 | 6.229209 |
| 30 C | 4.276474 | 3.308006 | 3.760252 | 4.375576 | 4.068041 |
| 31 O | 5.235545 | 3.938933 | 4.793030 | 5.359659 | 5.183693 |
| 32 C | 3.074733 | 4.838269 | 4.106313 | 4.862073 | 3.514899 |
| 33 O | 3.326265 | 5.510812 | 5.030796 | 5.879454 | 4.368207 |
| 34 C | 4.958558 | 5.052364 | 3.591966 | 3.516678 | 3.545572 |
| 35 O | 5.600189 | 5.685414 | 3.975284 | 3.641306 | 3.930305 |
|      | 26       | 27       | 28       | 29       | 30       |
| 26 H | 0.000000 |          |          |          |          |
| 27 C | 2.246297 | 0.000000 |          |          |          |
| 28 C | 5.223807 | 5.326745 | 0.000000 |          |          |
| 29 O | 6.341904 | 6.341765 | 1.143319 | 0.000000 |          |
| 30 C | 4.876749 | 3.696464 | 3.780917 | 4.257916 | 0.000000 |
| 31 O | 6.016180 | 4.717183 | 4.339822 | 4.547613 | 1.143190 |
| 32 C | 3.900284 | 3.057337 | 2.696761 | 3.572986 | 2.564853 |

|  |    |   |          |          |          |          |          |
|--|----|---|----------|----------|----------|----------|----------|
|  | 33 | O | 4.785670 | 3.587783 | 3.388107 | 4.060731 | 3.081814 |
|  | 34 | C | 3.436752 | 4.396827 | 2.716322 | 3.613535 | 3.984955 |
|  | 35 | O | 3.555462 | 5.034053 | 3.696570 | 4.536230 | 5.112648 |
|  |    |   | 31       | 32       | 33       | 34       | 35       |
|  | 31 | O | 0.000000 |          |          |          |          |
|  | 32 | C | 3.407634 | 0.000000 |          |          |          |
|  | 33 | O | 3.653604 | 1.170912 | 0.000000 |          |          |
|  | 34 | C | 4.922620 | 3.448273 | 4.595370 | 0.000000 |          |
|  | 35 | O | 6.064853 | 4.518612 | 5.659578 | 1.203491 | 0.000000 |

Table S7. Orbital energies and the HOMO-LUMO gaps.

| Structure   | HOMO energy (Hartree) | LUMO energy (Hartree) | HOMO/LU MO Gap (Hartree) | HOMO/LUMO Gap (eV) |
|-------------|-----------------------|-----------------------|--------------------------|--------------------|
| Ru2PCO0-1S  | -0.19330              | -0.07037              | 0.12293                  | 3.35               |
| Ru2PCO0-2S  | -0.18523              | -0.07996              | 0.10527                  | 2.86               |
| Ru2PCO0-3T  | -0.18603              | -0.04538              | 0.14065                  | 3.83               |
| Ru2PCO0-4T  | -0.18149              | -0.06896              | 0.11253                  | 3.06               |
| Ru2PCO0-5T  | -0.17812              | -0.07340              | 0.10472                  | 2.85               |
| Ru2PCO0-6Q  | -0.17544              | -0.05980              | 0.11564                  | 3.15               |
| Ru2PCO1-1S  | -0.20566              | -0.05170              | 0.15396                  | 4.19               |
| Ru2PCO1-2S  | -0.19437              | -0.06949              | 0.12488                  | 3.40               |
| Ru2PCO1-3S  | -0.19874              | -0.08089              | 0.11785                  | 3.21               |
| Ru2PCO1-4S  | -0.19590              | -0.08067              | 0.11523                  | 3.14               |
| Ru2PCO1-5T  | -0.15883              | -0.05167              | 0.10716                  | 2.92               |
| Ru2PCO2-1S  | -0.20228              | -0.04698              | 0.15530                  | 4.23               |
| Ru2PCO2-2S  | -0.19069              | -0.08247              | 0.10822                  | 2.94               |
| Ru2PCO2-3S  | -0.19954              | -0.04549              | 0.15405                  | 4.19               |
| Ru2PCO2-4S  | -0.20892              | -0.08343              | 0.12549                  | 3.41               |
| Ru2PCO2-5S  | -0.20889              | -0.08403              | 0.12486                  | 3.40               |
| Ru2PCO2-6S  | -0.18655              | -0.09698              | 0.08957                  | 2.44               |
| Ru2PCO2-7T  | -0.18264              | -0.05060              | 0.13204                  | 3.59               |
| Ru2PCO2-8T  | -0.19153              | -0.04471              | 0.14682                  | 4.00               |
| Ru2PCO2-9T  | -0.17416              | -0.04639              | 0.12777                  | 3.48               |
| Ru2PCO2-10T | -0.17722              | -0.03822              | 0.13900                  | 3.78               |
| Ru2PCO2-11T | -0.18564              | -0.06731              | 0.11833                  | 3.22               |
| Ru2PCO2-12S | -0.18725              | -0.06735              | 0.11990                  | 3.26               |
| Ru2PCO2-13S | -0.18104              | -0.04120              | 0.13984                  | 3.81               |
| Ru2PCO3-1S  | -0.20516              | -0.05109              | 0.15407                  | 4.19               |
| Ru2PCO3-2S  | -0.20376              | -0.05273              | 0.15103                  | 4.11               |



|            |          |          |         |      |
|------------|----------|----------|---------|------|
| Ru2PCO3-3S | -0.20123 | -0.05411 | 0.14712 | 4.00 |
| Ru2PCO3-4S | -0.19927 | -0.05067 | 0.14860 | 4.04 |
| Ru2PCO3-5S | -0.21178 | -0.08005 | 0.13173 | 3.58 |
| Ru2PCO4-1S | -0.18309 | -0.03332 | 0.14977 | 4.08 |
| Ru2PCO4-2S | -0.18506 | -0.05059 | 0.13447 | 3.66 |
| Ru2PCO4-3S | -0.20037 | -0.05844 | 0.14193 | 3.86 |
| Ru2PCO4-4S | -0.20139 | -0.06424 | 0.13715 | 3.73 |
